# Supplementary material for: A genome-wide cross-phenotype meta-analysis of the association of blood pressure with migraine
Source: PubMed Central journal article supplement (PMC7338361; doi:10.1038/s41467-020-17002-0), 2020-07-06
Supplement: 41467_2020_17002_MOESM1_ESM.pdf [file 41467_2020_17002_MOESM1_ESM.pdf]

**Supplementary Information**

**A genome-wide cross-phenotype meta-analysis of the association of blood pressure with  
migraine**

**Guo et. al.**

## Contents

|                                     |    |
|-------------------------------------|----|
| <b>Supplementary Notes</b> .....    | 4  |
| <i>Supplementary Note 1</i> .....   | 4  |
| <i>Supplementary Note 2</i> .....   | 4  |
| <i>Supplementary Note 3</i> .....   | 4  |
| <b>Supplementary Table 1</b> .....  | 6  |
| <b>Supplementary Table 2</b> .....  | 7  |
| <b>Supplementary Table 3</b> .....  | 8  |
| <b>Supplementary Table 4</b> .....  | 10 |
| <b>Supplementary Table 5</b> .....  | 11 |
| <b>Supplementary Table 6</b> .....  | 13 |
| <b>Supplementary Table 7</b> .....  | 14 |
| <b>Supplementary Table 8</b> .....  | 15 |
| <b>Supplementary Table 9</b> .....  | 16 |
| <b>Supplementary Table 10</b> ..... | 17 |
| <b>Supplementary Table 11</b> ..... | 18 |
| <b>Supplementary Table 12</b> ..... | 19 |
| <b>Supplementary Table 13</b> ..... | 20 |
| <b>Supplementary Table 14</b> ..... | 21 |
| <b>Supplementary Table 15</b> ..... | 22 |
| <b>Supplementary Table 16</b> ..... | 27 |
| <b>Supplementary Table 17</b> ..... | 30 |
| <b>Supplementary Table 18</b> ..... | 33 |
| <b>Supplementary Table 19</b> ..... | 35 |
| <b>Supplementary Table 20</b> ..... | 37 |
| <b>Supplementary Table 21</b> ..... | 39 |
| <b>Supplementary Table 22</b> ..... | 41 |
| <b>Supplementary Table 23</b> ..... | 43 |
| <b>Supplementary Table 24</b> ..... | 45 |
| <b>Supplementary Table 25</b> ..... | 47 |
| <b>Supplementary Figure 1</b> ..... | 48 |
| <b>Supplementary Figure 2</b> ..... | 48 |
| <b>Supplementary Figure 3</b> ..... | 48 |
| <b>Supplementary Figure 4</b> ..... | 49 |
| <b>Supplementary Figure 5</b> ..... | 49 |

|                                                                                |    |
|--------------------------------------------------------------------------------|----|
| <b>Supplementary Figure 6</b> .....                                            | 49 |
| <b>Supplementary Figure 7</b> .....                                            | 50 |
| <b>Supplementary Figure 8</b> .....                                            | 50 |
| <b>Supplementary Figure 9</b> .....                                            | 50 |
| <b>Supplementary Figure 10</b> .....                                           | 51 |
| <b>Supplementary Figure 11</b> .....                                           | 51 |
| <b>Supplementary Figure 12</b> .....                                           | 52 |
| <b>Supplementary Figure 13</b> .....                                           | 52 |
| <b>Supplementary Figure 14</b> .....                                           | 53 |
| <b>Supplementary Figure 15</b> .....                                           | 53 |
| <b>Supplementary Figure 16</b> .....                                           | 54 |
| <b>Supplementary Figure 17</b> .....                                           | 54 |
| <b>Supplementary Figure 18</b> .....                                           | 55 |
| <b>Supplementary Figure 19</b> .....                                           | 55 |
| <b>Supplementary Figure 20</b> .....                                           | 56 |
| <b>Supplementary Figure 21</b> .....                                           | 56 |
| <b>Supplementary Figure 22</b> .....                                           | 57 |
| <b>Supplementary Figure 23</b> .....                                           | 58 |
| <b>Supplementary Figure 24</b> .....                                           | 59 |
| <b>Supplementary Figure 25</b> .....                                           | 60 |
| <b>Supplementary Figure 26</b> .....                                           | 61 |
| <b>Supplementary Figure 27</b> .....                                           | 62 |
| <b>Supplementary Figure 28</b> .....                                           | 63 |
| <b>Supplementary Figure 29</b> .....                                           | 64 |
| <b>Author list for International Headache Genetics Consortium (IHGC)</b> ..... | 65 |
| <b>Author list for MEGASTROKE Consortium</b> .....                             | 67 |
| <b>Author list for CARDIoGRAM Consortium</b> .....                             | 74 |
| <b>Author list for ICBP Consortium</b> .....                                   | 76 |
| <b>References</b> .....                                                        | 82 |

## Supplementary Notes

### Supplementary Note 1

#### **Replication of novel migraine candidate associations from CPASSOC**

Replication of novel migraine candidate associations from CPASSOC was performed using logistic models adjusting for sex, age, genotype array, recruitment center, and the first 10 genetic principal components (PCs) in an independent data set from UK Biobank (restricted to unrelated European ancestry) for migraine ( $N_{\text{cases}} / N_{\text{controls}} = 10,005 / 267,330$  from data field 20002 with excluding participants with broad headache [defined by data field 6159] in migraine controls to avoid bias due to high correlation and heterogeneity between them) and broad headache ( $N_{\text{cases}} / N_{\text{controls}} = 67,052 / 269,883$ , data field: 6159).

### Supplementary Note 2

#### **Transcriptome-wide association studies (TWAS)**

We performed TWAS to identify genes whose expression pattern across tissues implicates etiology or biological mechanisms shared by migraine and the BP measures. To do this, we first merged the summary statistics for each trait to a subset of SNPs with Hapmap3 SNPs excluding the HLA region<sup>1</sup>, and then integrated this pruned GWAS summary data (~1.2 million SNPs) for migraine or each of BP traits (SBP, DBP, and PP) with LD-adjusted weight vector learned from the gene expression data to perform TWASs across 48 tissues from GTEx v.7<sup>2</sup> using available software and precompiled data resources (see URLs)<sup>1,3</sup>. The strength of association between concordant gene-based genetic influences on gene expression on migraine or BP was given by  $Z_{\text{TWAS}}$  as described<sup>3</sup>. The number of available gene-based models for gene expression from GTEx ranged from 1,604 for brain substantia nigra to 9,826 for thyroid. We also conducted conditional TWAS analysis among the shared genes by leveraging previous methods for joint/conditional tests of SNPs using summary statistics<sup>4,5</sup> to identify an independent set of TWAS genes. The correlation/LD matrix for this step was computed using Pearson correlation of genetic effects on gene expression predicted for the 1000 genomes genotypes as described<sup>4</sup> across all pairwise genes shared by migraine and the BP measures. With this correlation matrix, we determined separate sets of independent gene-based models of genetic

effects for migraine and BP measures separately, deriving a final set of shared gene-based models as the overlap across tissues.

### **Supplementary Note 3**

#### **Mendelian Randomization (MR) sensitivity analyses**

We conducted sensitivity analyses for the primary MR analysis using conventional inverse-variance weighted (IVW) MR, weighted median, simple median, MR-egger (Egger regression) implemented in R package “MendelianRandomization”<sup>6</sup>. We also applied MR-Steiger with the R package “TwoSampleMR” to assure that the causal direction between the hypothesized exposure and outcome was correctly assigned<sup>7</sup>.

**Supplementary Table 1 Genome-wide significant regions from local genetic correlation analysis ( $\rho$ -HESS) between migraine and blood pressure ( $P < 0.05/1703$ )**

| Trait 1  | Trait 2 | chr | start    | end      | num_snp | local_rhog  | var      | se       | z     | <i>p</i> |
|----------|---------|-----|----------|----------|---------|-------------|----------|----------|-------|----------|
| Migraine | DBP     | 10  | 95396368 | 96221243 | 1073    | 0.00022339  | 2.55E-09 | 5.05E-05 | 4.42  | 9.85E-06 |
|          |         | 6   | 94441175 | 97093511 | 4084    | 0.00022129  | 2.14E-09 | 4.63E-05 | 4.78  | 1.74E-06 |
|          | SBP     | 7   | 39862670 | 42001811 | 2725    | -0.0001779  | 1.77E-09 | 4.21E-05 | -4.23 | 2.35E-05 |
|          |         | 10  | 95396368 | 96221243 | 1073    | 0.00022985  | 2.98E-09 | 5.46E-05 | 4.21  | 2.56E-05 |
|          | PP      | 6   | 94441175 | 97093511 | 4084    | 0.00021535  | 2.14E-09 | 4.62E-05 | 4.66  | 3.20E-06 |
|          |         | 7   | 39862670 | 42001811 | 2725    | -0.00025176 | 2.10E-09 | 4.58E-05 | -5.49 | 3.98E-08 |

Abbreviations: chr: chromosome; num\_snp: number of SNPs in region; local\_rhog: local genetic covariance in the corresponding region; se: standard error; DBP: diastolic blood pressure; SBP: systolic blood pressure; PP: pulse pressure.

**Supplementary Table 2 Genome-wide significant regions from local genetic correlation analysis (GWAS-PW) between migraine and blood pressure (PPA\_3>0.90)**

| Trait 1  | Trait 2 | NSNP | chr       | st        | sp        | PPA_1    | PPA_2    | PPA_3 | PPA_4 |
|----------|---------|------|-----------|-----------|-----------|----------|----------|-------|-------|
| Migraine | DBP     | 4201 | 1         | 156336687 | 158027330 | 4.79E-09 | 1.68E-18 | 0.97  | 0.03  |
|          |         | 5308 | 1         | 175089963 | 177433277 | 1.48E-10 | 0.0006   | 0.96  | 0.04  |
|          |         | 3197 | 2         | 95358799  | 98994973  | 6.01E-28 | 0.00022  | 0.93  | 0.06  |
|          |         | 3876 | 3         | 123518258 | 124935910 | 1.24E-17 | 0.00055  | 0.96  | 0.04  |
|          |         | 6708 | 6         | 94441595  | 97093400  | 4.02E-11 | 4.37E-23 | 0.96  | 0.04  |
|          |         | 1695 | 10        | 95397754  | 96220615  | 2.31E-56 | 1.11E-11 | 0.99  | 0.01  |
|          |         | 4293 | 10        | 96222131  | 97820339  | 2.39E-26 | 9.16E-05 | 0.94  | 0.06  |
|          |         | 849  | 12        | 8429979   | 9031328   | 1.60E-17 | 0.00255  | 0.98  | 0.01  |
|          |         | 4914 | 13        | 109815112 | 111231864 | 3.33E-11 | 0.00067  | 0.95  | 0.04  |
|          | 4992    | 20   | 18972387  | 20959637  | 3.89E-10  | 5.13E-16 | 0.98     | 0.02  |       |
|          | DBP     | 4201 | 1         | 156336687 | 158027330 | 1.01E-08 | 3.26E-22 | 0.95  | 0.05  |
|          |         | 3876 | 3         | 123518258 | 124935910 | 7.80E-19 | 1.14E-07 | 0.91  | 0.09  |
|          |         | 3426 | 6         | 11791351  | 13209144  | 3.58E-18 | 8.69E-23 | 1.00  | 0.00  |
|          |         | 6708 | 6         | 94441595  | 97093400  | 2.01E-20 | 4.02E-27 | 0.96  | 0.04  |
|          |         | 4050 | 7         | 39863558  | 42001171  | 2.62E-16 | 3.54E-16 | 0.93  | 0.07  |
|          |         | 1695 | 10        | 95397754  | 96220615  | 8.33E-48 | 2.43E-15 | 0.98  | 0.02  |
|          |         | 849  | 12        | 8429979   | 9031328   | 1.05E-10 | 7.13E-07 | 0.95  | 0.05  |
|          |         | 3876 | 3         | 123518258 | 124935910 | 2.19E-10 | 0.00112  | 0.90  | 0.10  |
|          |         | 3426 | 6         | 11791351  | 13209144  | 2.70E-36 | 5.29E-19 | 1.00  | 0.00  |
| 6708     |         | 6    | 94441595  | 97093400  | 1.55E-17  | 2.31E-23 | 0.98     | 0.02  |       |
| SBP      | 4050    | 7    | 39863558  | 42001171  | 8.26E-27  | 2.29E-12 | 0.95     | 0.05  |       |
|          | 8343    | 11   | 101331132 | 103958766 | 5.52E-12  | 1.80E-05 | 0.95     | 0.05  |       |
|          | 2853    | 12   | 55665948  | 57548466  | 1.59E-09  | 8.35E-45 | 0.99     | 0.01  |       |
|          | 5202    | 12   | 89684199  | 92065305  | 1.55E-59  | 0.00734  | 0.91     | 0.08  |       |
|          | 4914    | 13   | 109815112 | 111231864 | 3.49E-08  | 0.00027  | 0.98     | 0.02  |       |
|          | 4992    | 20   | 18972387  | 20959637  | 1.13E-34  | 2.37E-15 | 0.91     | 0.09  |       |
|          | 3322    | 21   | 35226082  | 36523905  | 6.58E-12  | 9.37E-05 | 0.94     | 0.06  |       |
|          | 3322    | 21   | 35226082  | 36523905  | 6.58E-12  | 9.37E-05 | 0.94     | 0.06  |       |

Abbreviations: chr: chromosome; NSNP: number of SNPs in region; st:start; ed:end; PPA\_1: posterior probability for model 1 (association only to phenotype 1); PPA\_2: posterior probability for model 2 (association only to phenotype 2); PPA\_3: posterior probability for model 3 (shared association to both phenotypes); PPA\_4: posterior probability for model 4 (two distinct associations, one to each phenotype); DBP: diastolic blood pressure; SBP: systolic blood pressure; PP: pulse pressure.

**Supplementary Table 3** Genome-wide significant loci shared between migraine and diastolic blood pressure (DBP) from cross-trait meta-analysis using CPASSOC ( $P_{\text{meta}} \leq 5 \times 10^{-08}$ )

| SNP        | CHR | BP        | POS                        | A1 | A2 | A1FREQ | Migraine |      |          | DBP   |      |          | $P_{\text{meta}}$ | Genes within Ranges                                                                                                                                                                                                   |
|------------|-----|-----------|----------------------------|----|----|--------|----------|------|----------|-------|------|----------|-------------------|-----------------------------------------------------------------------------------------------------------------------------------------------------------------------------------------------------------------------|
|            |     |           |                            |    |    |        | BETA     | SE   | $P$      | BETA  | SE   | $P$      |                   |                                                                                                                                                                                                                       |
| rs1271309  | 12  | 124820705 | chr12:124771217..124843104 | A  | G  | 0.17   | -0.04    | 0.01 | 8.56E-06 | -0.20 | 0.02 | 1.45E-16 | 2.04E-20          | FAM101A,MIR6880,NCOR2,ZNF664-FAM101A                                                                                                                                                                                  |
| rs13260    | 13  | 110802123 | chr13:110788441..110818102 | T  | G  | 0.09   | 0.06     | 0.01 | 6.60E-07 | -0.20 | 0.03 | 1.66E-10 | 8.69E-15          | COL4A1                                                                                                                                                                                                                |
| rs1861881  | 9   | 119312256 | chr9:119157030..119486923  | T  | G  | 0.31   | 0.03     | 0.01 | 6.60E-06 | 0.12  | 0.02 | 6.49E-10 | 1.67E-13          | ASTN2,LOC100128505,PAPPA,PAPPA-AS1,TRIM32                                                                                                                                                                             |
| rs2004295  | 6   | 39154866  | chr6:39093606..39187886    | A  | G  | 0.27   | -0.04    | 0.01 | 4.60E-08 | -0.13 | 0.02 | 4.79E-11 | 3.34E-16          | KCNK5                                                                                                                                                                                                                 |
| rs2052692  | 11  | 10667641  | chr11:10579687..10736660   | A  | G  | 0.33   | -0.05    | 0.01 | 3.38E-13 | 0.17  | 0.02 | 4.28E-21 | 4.50E-31          | LYVE1,MRVII,MRVII-AS1                                                                                                                                                                                                 |
| rs2274319  | 1   | 156450873 | chr1:156406853..156507670  | T  | C  | 0.35   | 0.07     | 0.01 | 1.43E-21 | 0.10  | 0.02 | 1.65E-07 | 3.64E-21          | IQGAP3,MEF2D                                                                                                                                                                                                          |
| rs2500281  | 1   | 3220382   | chr1:3210950..3229134      | A  | G  | 0.28   | -0.04    | 0.01 | 5.43E-06 | 0.10  | 0.02 | 9.73E-07 | 6.21E-10          | PRDM16                                                                                                                                                                                                                |
| rs28451064 | 21  | 35593827  | chr21:35593827..35682958   | A  | G  | 0.13   | -0.06    | 0.01 | 2.69E-07 | 0.13  | 0.03 | 1.54E-06 | 1.96E-10          | near MRPS6                                                                                                                                                                                                            |
| rs28455731 | 6   | 121846038 | chr6:121782750..121848841  | T  | G  | 0.16   | 0.05     | 0.01 | 7.29E-09 | -0.11 | 0.02 | 3.37E-06 | 7.51E-11          | near GJA1                                                                                                                                                                                                             |
| rs2971603  | 6   | 97035418  | chr6:96732257..97081432    | T  | C  | 0.23   | 0.09     | 0.01 | 2.83E-27 | 0.13  | 0.02 | 1.23E-09 | 5.67E-27          | FHL5,UFL1                                                                                                                                                                                                             |
| rs3766694  | 1   | 175143207 | chr1:175118895..175162805  | T  | C  | 0.61   | -0.03    | 0.01 | 1.26E-06 | 0.11  | 0.02 | 4.07E-10 | 3.17E-14          | KIAA0040                                                                                                                                                                                                              |
| rs3851738  | 16  | 75387533  | chr16:75305331..75516534   | C  | G  | 0.43   | -0.04    | 0.01 | 1.34E-09 | 0.13  | 0.02 | 7.09E-13 | 3.12E-19          | CFDP1,CHST6,TMEM170A                                                                                                                                                                                                  |
| rs4814864  | 20  | 19469817  | chr20:19455203..19573475   | C  | G  | 0.26   | 0.07     | 0.01 | 2.19E-19 | -0.11 | 0.02 | 8.04E-09 | 2.05E-19          | SLC24A3                                                                                                                                                                                                               |
| rs57866767 | 10  | 96023077  | chr10:95952031..96993955   | T  | C  | 0.44   | 0.05     | 0.01 | 2.32E-14 | 0.28  | 0.02 | 2.86E-57 | 7.42E-71          | C10orf129,CYP2C8,CYP2C9,CYP2C18,CYP2C19,HELLS,NO3L,PLCE1,PLCE1-AS1,TBC1D12ADRA2B,ARID5A,ASTL,CIAO1,CNNM4,DUSP2,FAHD2A,FAHD2CP,FER1L5,GPAT2,ITPRIPL1,KANSL3,KCNIP3,LINC00342,LMAN2L,NCAPH,NEURL3,PROM2,SNRNP200,STARD7 |
| rs62155750 | 2   | 96491456  | chr2:95931218..97428320    | A  | G  | 0.31   | 0.04     | 0.01 | 4.42E-07 | -0.22 | 0.02 | 8.27E-29 | 5.42E-34          | ITGB5,KALRN,MUC13,UMPS                                                                                                                                                                                                |
| rs6438857  | 3   | 124557643 | chr3:124331571..124648820  | T  | C  | 0.57   | -0.03    | 0.01 | 8.92E-07 | 0.15  | 0.02 | 1.50E-17 | 2.64E-22          |                                                                                                                                                                                                                       |



|            |    |           |                            |   |   |      |       |      |          |       |      |          |          |                                                                                        |
|------------|----|-----------|----------------------------|---|---|------|-------|------|----------|-------|------|----------|----------|----------------------------------------------------------------------------------------|
| rs6881648  | 5  | 74991849  | chr5:74328643..75146256    | A | C | 0.37 | -0.04 | 0.01 | 4.76E-07 | -0.17 | 0.02 | 5.06E-21 | 3.43E-26 | ANKDD1B,ANKRD31, COL4A3BP,HM GCR,POC5,POLK BMP8A,KIAA0754, MACF1,PABPC4,PP IEL,SNORA55 |
| rs72663521 | 1  | 40005903  | chr1:39551488..40088043    | A | G | 0.19 | 0.04  | 0.01 | 1.94E-06 | 0.13  | 0.02 | 1.42E-08 | 2.22E-12 | ACTR10,ARID4A,F LJ31306,PSMA3                                                          |
| rs8008129  | 14 | 58829032  | chr14:58668484..58853140   | T | C | 0.34 | 0.03  | 0.01 | 3.91E-06 | 0.09  | 0.02 | 1.37E-06 | 7.22E-10 | CNNM1,HPSE2                                                                            |
| rs978851   | 10 | 100660301 | chr10:100601902..101139262 | T | C | 0.29 | 0.04  | 0.01 | 7.76E-06 | 0.09  | 0.02 | 5.50E-06 | 5.51E-09 |                                                                                        |

Abbreviations: CHR: chromosome; BP: physical position; POS: position; A1FREQ: A1 allele frequency; DBP: diastolic blood pressure.

Position is under build 37/hg19.

All these loci were genome-wide significant ( $P < 5 \times 10^{-8}$ ) for cross-trait meta-analysis (using heterogenous version of CPASSOC, SHet) and  $P < 1 \times 10^{-5}$  for single trait GWAS.

**Supplementary Table 4 Genome-wide significant loci shared between migraine and systolic blood pressure (SBP) from cross-trait meta-analysis using CPASSOC ( $P_{\text{meta}} \leq 5 \times 10^{-08}$ )**

| SNP        | CHR | BP        | POS                        | A1 | A2 | A1FREQ1 | Migraine |      |          | SBP   |      |          | $P_{\text{meta}}$ | Genes within Ranges                                                           |
|------------|-----|-----------|----------------------------|----|----|---------|----------|------|----------|-------|------|----------|-------------------|-------------------------------------------------------------------------------|
|            |     |           |                            |    |    |         | BETA     | SE   | $P$      | BETA  | SE   | $P$      |                   |                                                                               |
| rs1048483  | 17  | 1966457   | chr17:1926337..2229067     | T  | C  | 0.49    | -0.03    | 0.01 | 1.31E-06 | -0.30 | 0.03 | 6.49E-23 | 9.29E-27          | DPH1,HIC1,LOC101927839,MIR132,MIR212,O<br>VCA2,RTN4RL1,SMG6,<br>SRR,TSR1      |
| rs12202891 | 6   | 12768218  | chr6:12768218..12768218    | T  | C  | 0.17    | -0.07    | 0.01 | 2.16E-10 | -0.21 | 0.04 | 5.81E-07 | 2.83E-12          | PHACTR1                                                                       |
| rs12947578 | 17  | 78246734  | chr17:78235300..78285371   | T  | C  | 0.43    | 0.05     | 0.01 | 1.11E-09 | -0.16 | 0.03 | 1.01E-06 | 8.76E-12          | RNF213                                                                        |
| rs1332844  | 6   | 12889004  | chr6:12762814..12982423    | T  | C  | 0.36    | -0.05    | 0.01 | 1.48E-13 | -0.21 | 0.03 | 1.06E-11 | 1.19E-19          | PHACTR1                                                                       |
| rs17171710 | 7   | 40440233  | chr7:40120135..40479852    | T  | C  | 0.11    | 0.09     | 0.01 | 4.98E-15 | -0.41 | 0.05 | 1.13E-16 | 1.17E-26          | CDK13,MPLKIP,SUGC<br>T (C7orf10)                                              |
| rs2052692  | 11  | 10667641  | chr11:10579687..10736660   | A  | G  | 0.33    | -0.05    | 0.01 | 3.38E-13 | 0.19  | 0.03 | 2.13E-09 | 6.23E-17          | LYVE1,MRV11,MRV11-<br>AS1                                                     |
| rs2274319  | 1   | 156450873 | chr1:156406853..156507670  | T  | C  | 0.35    | 0.07     | 0.01 | 1.43E-21 | 0.16  | 0.03 | 2.47E-07 | 1.70E-20          | IQGAP3,MEF2D                                                                  |
| rs2983896  | 6   | 97029871  | chr6:96682566..97081432    | A  | G  | 0.22    | 0.09     | 0.01 | 4.79E-27 | 0.34  | 0.04 | 1.61E-20 | 1.53E-37          | FHL5,UFL1                                                                     |
| rs4814864  | 20  | 19469817  | chr20:19455203..19573475   | C  | G  | 0.26    | 0.07     | 0.01 | 2.19E-19 | 0.18  | 0.03 | 1.44E-07 | 2.36E-18          | SLC24A3                                                                       |
| rs4888408  | 16  | 75432824  | chr16:75240935..75516534   | A  | G  | 0.43    | -0.04    | 0.01 | 3.02E-09 | 0.37  | 0.03 | 1.42E-32 | 4.24E-39          | BCAR1,CFDP1,CHST6,<br>CTRB1,CTRB2,LOC100<br>506281,TMEM170A                   |
| rs546240   | 11  | 30533622  | chr11:30493671..30570681   | T  | C  | 0.38    | -0.03    | 0.01 | 3.55E-06 | 0.15  | 0.03 | 5.76E-07 | 3.84E-10          | MPPED2                                                                        |
| rs57866767 | 10  | 96023077  | chr10:95952031..96797500   | T  | C  | 0.44    | 0.05     | 0.01 | 2.32E-14 | 0.45  | 0.03 | 1.14E-49 | 2.82E-60          | CYP2C8,CYP2C9,CYP2<br>C18,CYP2C19,HELLS,N<br>OC3L,PLCE1,PLCE1-<br>AS1,TBC1D12 |
| rs6438857  | 3   | 124557643 | chr3:124331571..124648820  | T  | C  | 0.57    | -0.03    | 0.01 | 8.92E-07 | 0.27  | 0.03 | 3.13E-19 | 1.77E-23          | ITGB5,KALRN,MUC13,<br>UMPS                                                    |
| rs733701   | 6   | 39171862  | chr6:39115413..39187886    | T  | C  | 0.26    | 0.06     | 0.01 | 1.26E-12 | 0.19  | 0.03 | 3.70E-08 | 7.53E-15          | KCNK5                                                                         |
| rs8080108  | 17  | 47513711  | chr17:47289566..47516523   | T  | C  | 0.30    | -0.03    | 0.01 | 3.74E-06 | -0.30 | 0.03 | 3.15E-20 | 1.22E-23          | ABI3,FLJ40194,LOC102<br>724596,MIR6129,PHB,P<br>HOSPHO1,ZNF652                |
| rs978851   | 10  | 100660301 | chr10:100601902..101139262 | T  | C  | 0.29    | 0.04     | 0.01 | 7.76E-06 | 0.15  | 0.03 | 8.10E-06 | 1.53E-08          | CNNM1,HPSE2                                                                   |

Abbreviations: CHR: chromosome; BP: physical position; POS: position; A1FREQ: A1 allele frequency; SBP: systolic blood pressure.

Position is under build 37/hg19.

All these loci were genome-wide significant ( $P < 5 \times 10^{-8}$ ) for cross-trait meta-analysis (using heterogenous version of CPASSOC, SHet) and  $P < 1 \times 10^{-5}$  for single trait GWAS.

**Supplementary Table 5 Genome-wide significant loci shared between migraine and pulse pressure (PP) from cross-trait meta-analysis using CPASSOC**  
( $P_{\text{meta}} \leq 5 \times 10^{-08}$ )

| SNP        | CHR | BP        | POS                        | A1 | A2 | A1FREQ1 | Migraine |      |          | PP    |      |          | $P_{\text{meta}}$ | Genes within Ranges                                                                          |
|------------|-----|-----------|----------------------------|----|----|---------|----------|------|----------|-------|------|----------|-------------------|----------------------------------------------------------------------------------------------|
|            |     |           |                            |    |    |         | BETA     | SE   | $P$      | BETA  | SE   | $P$      |                   |                                                                                              |
| rs1048483  | 17  | 1966457   | chr17:1926337..2229067     | T  | C  | 0.49    | -0.03    | 0.01 | 1.31E-06 | -0.20 | 0.02 | 1.47E-22 | 5.13E-28          | DPH1,HIC1,LOC101927839,<br>MIR132,MIR212,OVCA2,RT<br>N4RL1,SMG6,SRR,TSR1                     |
| rs11172113 | 12  | 57527283  | chr12:57256380..57545756   | T  | C  | 0.42    | 0.10     | 0.01 | 5.64E-49 | -0.12 | 0.02 | 3.02E-08 | 1.71E-50          | GPR182,LRP1,MYO1A,NA<br>B2,RDH16,SDR9C7,STAT6,<br>TAC3,TMEM194A,ZBTB39                       |
| rs12202891 | 6   | 12768218  | chr6:12768218..13022728    | T  | C  | 0.17    | -0.07    | 0.01 | 2.16E-10 | -0.21 | 0.03 | 5.19E-14 | 9.87E-22          | PHACTR1                                                                                      |
| rs12875271 | 13  | 110792743 | chr13:110788441..110804809 | A  | G  | 0.09    | -0.06    | 0.01 | 5.15E-07 | -0.19 | 0.04 | 1.18E-07 | 6.29E-12          | COL4A1                                                                                       |
| rs1332844  | 6   | 12889004  | chr6:12762814..13098302    | T  | C  | 0.36    | -0.05    | 0.01 | 1.48E-13 | -0.20 | 0.02 | 6.95E-22 | 3.11E-33          | PHACTR1                                                                                      |
| rs17171710 | 7   | 40440233  | chr7:40000089..40479852    | T  | C  | 0.11    | 0.09     | 0.01 | 4.98E-15 | -0.37 | 0.03 | 7.39E-28 | 3.10E-41          | CDK13,MPLKIP,SUGCT<br>(C7orf10)                                                              |
| rs1800470  | 19  | 41858921  | chr19:41851509..41946095   | A  | G  | 0.40    | 0.04     | 0.01 | 4.97E-07 | -0.15 | 0.02 | 1.76E-12 | 1.49E-17          | ATP5SL,B3GNT8,B9D2,BC<br>KDHA,EXOSC5,TGFB1,TM<br>EM91                                        |
| rs2282652  | 11  | 102097315 | chr11:101915105..102125714 | T  | C  | 0.33    | -0.04    | 0.01 | 6.47E-08 | 0.15  | 0.02 | 1.17E-11 | 2.46E-17          | C11orf70,YAP1                                                                                |
| rs28577186 | 16  | 4488191   | chr16:4399075..4687695     | A  | G  | 0.35    | -0.04    | 0.01 | 1.44E-06 | -0.14 | 0.02 | 8.39E-10 | 3.77E-14          | C16orf96,CDIP1,CORO7,CO<br>RO7-<br>PAM16,DNAJA3,HMOX2,M<br>GRN1,NMRAL1,PAM16,UB<br>ALD1,VASN |
| rs2983896  | 6   | 97029871  | chr6:96732257..97081432    | A  | G  | 0.22    | 0.09     | 0.01 | 4.79E-27 | 0.21  | 0.02 | 1.26E-17 | 2.74E-36          | FHL5,UFL1                                                                                    |
| rs4888408  | 16  | 75432824  | chr16:75242729..75516534   | A  | G  | 0.43    | -0.04    | 0.01 | 3.02E-09 | 0.25  | 0.02 | 1.01E-32 | 1.31E-41          | BCAR1,CFDP1,CHST6,CTR<br>B1,LOC100506281,TMEM1<br>70A                                        |
| rs546240   | 11  | 30533622  | chr11:30449319..30570681   | T  | C  | 0.38    | -0.03    | 0.01 | 3.55E-06 | 0.13  | 0.02 | 4.47E-10 | 3.07E-14          | MPPED2                                                                                       |
| rs57866767 | 10  | 96023077  | chr10:95973747..96784778   | T  | C  | 0.44    | 0.05     | 0.01 | 2.32E-14 | 0.18  | 0.02 | 4.88E-18 | 2.35E-29          | CYP2C9,CYP2C18,CYP2C1<br>9,HELLS,NOC3L,PLCE1,PL<br>CE1-AS1,TBC1D12                           |
| rs6035355  | 20  | 19465089  | chr20:19455203..19614751   | A  | T  | 0.28    | 0.07     | 0.01 | 4.86E-18 | 0.29  | 0.02 | 1.25E-36 | 9.26E-54          | SLC24A3                                                                                      |
| rs6438857  | 3   | 124557643 | chr3:124441501..124648820  | T  | C  | 0.57    | -0.03    | 0.01 | 8.92E-07 | 0.13  | 0.02 | 9.00E-10 | 2.55E-14          | ITGB5,MUC13,UMPS                                                                             |
| rs6515020  | 20  | 19504904  | chr20:19460032..19587337   | T  | C  | 0.09    | -0.06    | 0.01 | 1.12E-07 | -0.21 | 0.03 | 5.79E-10 | 4.03E-15          | SLC24A3                                                                                      |

|           |    |           |                            |   |   |      |       |      |          |       |      |          |          |                                                                                                                                      |
|-----------|----|-----------|----------------------------|---|---|------|-------|------|----------|-------|------|----------|----------|--------------------------------------------------------------------------------------------------------------------------------------|
| rs6693567 | 1  | 150510660 | chr1:150250534..150832108  | T | C | 0.27 | -0.04 | 0.01 | 1.21E-08 | 0.14  | 0.02 | 4.09E-09 | 8.51E-15 | ADAMTSL4,ADAMTSL4-AS1,ARNT,C1orf54,CIART,CTSK,CTSS,ECM1,ENSA,GOLPH3L,HORMAD1,LINC00568,MCL1,MIR4257,MIR6878,MRPS21,PRPF3,RPRD2,TARS2 |
| rs934287  | 2  | 203708307 | chr2:203320423..204367311  | A | G | 0.17 | -0.04 | 0.01 | 3.66E-06 | 0.16  | 0.03 | 1.18E-09 | 1.01E-13 | ABI2,BMP2,CARF,CYP20A1,FAM117B,ICA1L,NBEAL1,RAPH1,WDR12                                                                              |
| rs974819  | 11 | 103660567 | chr11:103599717..103718660 | T | C | 0.29 | -0.03 | 0.01 | 1.00E-05 | 0.11  | 0.02 | 4.15E-07 | 1.67E-10 | Intergenic                                                                                                                           |
| rs9982601 | 21 | 35599128  | chr21:35566316..35716371   | T | C | 0.13 | -0.05 | 0.01 | 1.78E-07 | -0.21 | 0.03 | 7.51E-12 | 3.38E-17 | Intergenic                                                                                                                           |

Abbreviations: CHR: chromosome; BP: physical position; POS: position; A1FREQ: A1 allele frequency; PP: pulse pressure.

Position is under build 37/hg19.

All these loci were genome-wide significant ( $P < 5 \times 10^{-8}$ ) for cross-trait meta-analysis (using heterogenous version of CPASSOC, SHet) and  $P < 1 \times 10^{-5}$  for single trait GWAS.

**Supplementary Table 6 replication of migraine novel loci from CPASSOC meta-analysis by using logistic regression in UK Biobank**

| Chr | SNP        | BP        | A1 | A2 | MAF  | Migraine (N=277,335) |       |          | Headache (N=336,935) |       |          |
|-----|------------|-----------|----|----|------|----------------------|-------|----------|----------------------|-------|----------|
|     |            |           |    |    |      | BETA                 | SE    | P        | BETA                 | SE    | P        |
| 1   | rs72663521 | 40005903  | G  | A  | 0.18 | 0.004                | 0.019 | 0.82     | -0.020               | 0.008 | 0.01     |
| 1   | rs3766694  | 175143207 | T  | C  | 0.38 | -0.041               | 0.015 | 6.07E-03 | -0.028               | 0.006 | 1.54E-05 |
| 2   | rs62155750 | 96491456  | A  | G  | 0.31 | 0.036                | 0.016 | 0.02     | 0.004                | 0.007 | 0.55     |
| 3   | rs6438857  | 124557643 | T  | C  | 0.42 | -0.028               | 0.015 | 0.05     | -0.015               | 0.006 | 0.02     |
| 5   | rs6881648  | 74991849  | A  | C  | 0.37 | -0.066               | 0.015 | 9.39E-06 | -0.029               | 0.006 | 6.86E-06 |
| 11  | rs974819   | 103660567 | T  | C  | 0.29 | -0.009               | 0.016 | 0.56     | 0.008                | 0.007 | 0.23     |
| 12  | rs1271309  | 124820705 | A  | G  | 0.16 | -0.062               | 0.020 | 1.78E-03 | -0.030               | 0.008 | 3.27E-04 |
| 13  | rs12875271 | 110792743 | A  | G  | 0.09 | -0.064               | 0.024 | 8.59E-03 | -0.024               | 0.011 | 0.02     |
| 13  | rs13260    | 110802123 | G  | T  | 0.09 | -0.063               | 0.025 | 0.01     | -0.022               | 0.011 | 0.04     |
| 14  | rs8008129  | 58829032  | T  | C  | 0.36 | 0.041                | 0.015 | 6.93E-03 | 0.011                | 0.006 | 0.08     |
| 16  | rs28577186 | 4488191   | G  | A  | 0.33 | 0.028                | 0.015 | 0.07     | -0.005               | 0.007 | 0.44     |
| 17  | rs1048483  | 1966457   | C  | T  | 0.49 | 0.019                | 0.015 | 0.20     | 0.014                | 0.006 | 0.03     |
| 17  | rs8080108  | 47513711  | T  | C  | 0.31 | -0.054               | 0.016 | 6.43E-04 | -0.030               | 0.007 | 9.98E-06 |
| 19  | rs1800470  | 41858921  | G  | A  | 0.37 | -0.049               | 0.015 | 1.19E-03 | -0.024               | 0.006 | 1.59E-04 |
| 21  | rs28451064 | 35593827  | G  | A  | 0.13 | 0.117                | 0.023 | 2.96E-07 | 0.032                | 0.009 | 6.37E-04 |
| 21  | rs9982601  | 35599128  | C  | T  | 0.13 | 0.092                | 0.022 | 3.82E-05 | 0.025                | 0.009 | 6.14E-03 |

Abbreviations: Chr: chromosome; BP: physical position; MAF: minor allele frequency; SE: standard error.

Position is under build 37/hg19.

Model adjusted for sex, age, genotype array, recruitment center, and 10 PCs.

**Supplementary Table 7 eQTL results for rs62155750 at ADRA2B from GTEx (version 7 release)**

| Gencode Id        | Gene Symbol | Variant Id         | SNP Id     | P-Value  | NES  | Tissue                       |
|-------------------|-------------|--------------------|------------|----------|------|------------------------------|
| ENSG00000222040.3 | ADRA2B      | 2_96491456_A_G_b37 | rs62155750 | 1.40E-14 | 0.46 | Thyroid                      |
| ENSG00000222040.3 | ADRA2B      | 2_96491456_A_G_b37 | rs62155750 | 7.90E-11 | 0.41 | Nerve - Tibial               |
| ENSG00000222040.3 | ADRA2B      | 2_96491456_A_G_b37 | rs62155750 | 2.10E-08 | 0.33 | Colon - Transverse           |
| ENSG00000222040.3 | ADRA2B      | 2_96491456_A_G_b37 | rs62155750 | 2.90E-08 | 0.29 | Adipose - Subcutaneous       |
| ENSG00000222040.3 | ADRA2B      | 2_96491456_A_G_b37 | rs62155750 | 3.30E-08 | 0.34 | Stomach                      |
| ENSG00000222040.3 | ADRA2B      | 2_96491456_A_G_b37 | rs62155750 | 4.1E-06  | 0.31 | Adipose - Visceral (Omentum) |
| ENSG00000222040.3 | ADRA2B      | 2_96491456_A_G_b37 | rs62155750 | 4.8E-06  | 0.26 | Esophagus - Muscularis       |
| ENSG00000222040.3 | ADRA2B      | 2_96491456_A_G_b37 | rs62155750 | 0.000038 | 0.22 | Muscle - Skeletal            |

Abbreviations: NES=normalized effect size.

**Supplementary Table 8 eQTL results for rs1048483 from GTEx (version 7 release)**

| Gencode Id        | Gene Symbol | Variant Id         | SNP Id    | P-Value   | NES   | Tissue                                   |
|-------------------|-------------|--------------------|-----------|-----------|-------|------------------------------------------|
| ENSG00000167720.8 | SRR         | 17_1966457_C_T_b37 | rs1048483 | 2.30E-17  | -0.45 | Artery - Tibial                          |
| ENSG00000167720.8 | SRR         | 17_1966457_C_T_b37 | rs1048483 | 4.20E-17  | -0.41 | Muscle - Skeletal                        |
| ENSG00000167720.8 | SRR         | 17_1966457_C_T_b37 | rs1048483 | 5.50E-16  | -0.46 | Esophagus - Mucosa                       |
| ENSG00000167720.8 | SRR         | 17_1966457_C_T_b37 | rs1048483 | 2.10E-14  | -0.34 | Lung                                     |
| ENSG00000167720.8 | SRR         | 17_1966457_C_T_b37 | rs1048483 | 2.70E-14  | -0.36 | Thyroid                                  |
| ENSG00000167720.8 | SRR         | 17_1966457_C_T_b37 | rs1048483 | 6.00E-14  | -0.43 | Skin - Sun Exposed (Lower leg)           |
| ENSG00000167720.8 | SRR         | 17_1966457_C_T_b37 | rs1048483 | 1.10E-13  | -0.35 | Esophagus - Muscularis                   |
| ENSG00000167720.8 | SRR         | 17_1966457_C_T_b37 | rs1048483 | 3.40E-12  | -0.37 | Adipose - Subcutaneous                   |
| ENSG00000167720.8 | SRR         | 17_1966457_C_T_b37 | rs1048483 | 9.90E-12  | -0.4  | Heart - Atrial Appendage                 |
| ENSG00000167720.8 | SRR         | 17_1966457_C_T_b37 | rs1048483 | 1.40E-11  | -0.37 | Adipose - Visceral (Omentum)             |
| ENSG00000167720.8 | SRR         | 17_1966457_C_T_b37 | rs1048483 | 1.40E-10  | -0.4  | Colon - Transverse                       |
| ENSG00000167720.8 | SRR         | 17_1966457_C_T_b37 | rs1048483 | 2.60E-10  | -0.44 | Colon - Sigmoid                          |
| ENSG00000167720.8 | SRR         | 17_1966457_C_T_b37 | rs1048483 | 3.60E-10  | -0.36 | Whole Blood                              |
| ENSG00000167720.8 | SRR         | 17_1966457_C_T_b37 | rs1048483 | 2.00E-09  | -0.36 | Skin - Not Sun Exposed (Suprapubic)      |
| ENSG00000167720.8 | SRR         | 17_1966457_C_T_b37 | rs1048483 | 2.20E-09  | -0.46 | Stomach                                  |
| ENSG00000167720.8 | SRR         | 17_1966457_C_T_b37 | rs1048483 | 2.80E-09  | -0.38 | Breast - Mammary Tissue                  |
| ENSG00000167720.8 | SRR         | 17_1966457_C_T_b37 | rs1048483 | 3.50E-09  | -0.36 | Nerve - Tibial                           |
| ENSG00000167720.8 | SRR         | 17_1966457_C_T_b37 | rs1048483 | 1.20E-08  | -0.33 | Esophagus - Gastroesophageal Junction    |
| ENSG00000167720.8 | SRR         | 17_1966457_C_T_b37 | rs1048483 | 1.20E-07  | -0.29 | Artery - Aorta                           |
| ENSG00000167720.8 | SRR         | 17_1966457_C_T_b37 | rs1048483 | 1.60E-07  | -0.46 | Pancreas                                 |
| ENSG00000167720.8 | SRR         | 17_1966457_C_T_b37 | rs1048483 | 1.70E-07  | -0.28 | Cells - Transformed fibroblasts          |
| ENSG00000167720.8 | SRR         | 17_1966457_C_T_b37 | rs1048483 | 3.60E-07  | -0.45 | Brain - Cerebellum                       |
| ENSG00000167720.8 | SRR         | 17_1966457_C_T_b37 | rs1048483 | 4.60E-07  | -0.29 | Heart - Left Ventricle                   |
| ENSG00000167720.8 | SRR         | 17_1966457_C_T_b37 | rs1048483 | 5.00E-07  | -0.34 | Adrenal Gland                            |
| ENSG00000167720.8 | SRR         | 17_1966457_C_T_b37 | rs1048483 | 8.20E-07  | -0.49 | Brain - Anterior cingulate cortex (BA24) |
| ENSG00000167720.8 | SRR         | 17_1966457_C_T_b37 | rs1048483 | 9.70E-07  | -0.47 | Brain - Cortex                           |
| ENSG00000185924.6 | RTN4RL1     | 17_1966457_C_T_b37 | rs1048483 | 0.0000013 | 0.17  | Adipose - Visceral (Omentum)             |

Abbreviations: NES=normalized effect size.

**Supplementary Table 9** Genome-wide significant loci shared between migraine with aura and diastolic blood pressure (DBP) from cross-trait meta-analysis using CPASSOC ( $P_{\text{meta}} \leq 5 \times 10^{-08}$ )

| SNP      | CHR | BP       | POS                    | A1 | A2 | A1FREQ | Migraine with aura |      |          | SBP   |      |          | $P_{\text{meta}}$ | Genes within Ranges              |  |
|----------|-----|----------|------------------------|----|----|--------|--------------------|------|----------|-------|------|----------|-------------------|----------------------------------|--|
|          |     |          |                        |    |    |        | BETA               | SE   | P        | BETA  | SE   | P        |                   |                                  |  |
| rs379829 |     |          | chr6:96841762..9706704 |    |    |        |                    |      |          |       |      |          |                   |                                  |  |
| 3        | 6   | 97033370 | 7                      | A  | G  | 0.22   | -0.12              | 0.03 | 6.63E-07 | -0.13 | 0.02 | 2.70E-10 | 1.04E-12          | [ <b>FHL5</b> ,UFL1]             |  |
| rs205269 |     |          | chr11:10579687..107366 |    |    |        |                    |      |          |       |      |          |                   |                                  |  |
| 2        | 11  | 10667641 | 60                     | A  | G  | 0.65   | -0.11              | 0.02 | 3.09E-06 | 0.17  | 0.02 | 4.28E-21 | 1.09E-24          | [LYVE1, <b>MRVI1</b> ,MRVI1-AS1] |  |

Abbreviations: CHR: chromosome; BP: physical position; POS: position; A1FREQ: A1 allele frequency; DBP: dystolic blood pressure.

Position is under build 37/hg19.

All these loci were genome-wide significant ( $P < 5 \times 10^{-8}$ ) for cross-trait meta-analysis (using heterogonous version of CPASSOC, SHet) and  $P < 1 \times 10^{-5}$  for single trait GWAS.



**Supplementary Table 10** Genome-wide significant loci shared between migraine with aura and systolic blood pressure (SBP) from cross-trait meta-analysis using CPASSOC ( $P_{\text{meta}} \leq 5 \times 10^{-08}$ )

| SNP       | CHR | BP       | POS                          | A1 | A2 | A1FREQ1 | Migraine with aura |      |          | SBP  |      |          | $P_{\text{meta}}$ | Genes within Ranges         |
|-----------|-----|----------|------------------------------|----|----|---------|--------------------|------|----------|------|------|----------|-------------------|-----------------------------|
|           |     |          |                              |    |    |         | BETA               | SE   | $P$      | BETA | SE   | $P$      |                   |                             |
| rs2983896 | 6   | 97029871 | chr6:96767685..9708143<br>2  | A  | G  | 0.22    | 0.12               | 0.03 | 8.85E-07 | 0.34 | 0.04 | 1.61E-20 | 2.72E-26          | [FHL5,UFL1]                 |
| rs2052692 | 11  | 10667641 | chr11:10579687..107366<br>60 | A  | G  | 0.65    | -0.11              | 0.02 | 3.09E-06 | 0.19 | 0.03 | 2.13E-09 | 3.02E-12          | [LYVE1,MRVII,M<br>RVII-AS1] |

Abbreviations: CHR: chromosome; BP: physical position; POS: position; A1FREQ: A1 allele frequency; SBP: systolic blood pressure.

Position is under build 37/hg19.

All these loci were genome-wide significant ( $P < 5 \times 10^{-8}$ ) for cross-trait meta-analysis (using heterogenous version of CPASSOC, SHet) and  $P < 1 \times 10^{-5}$  for single trait GWAS.

**Supplementary Table 11** Genome-wide significant loci shared between migraine with aura and pulse pressure (PP) from cross-trait meta-analysis using CPASSOC ( $P_{\text{meta}} \leq 5 \times 10^{-08}$ )

| SNP        | CHR | BP           | POS                          | A<br>1 | A<br>2 | A1FREQ<br>1 | Migraine with aura |      |              | PP       |      |              | $P_{\text{meta}}$ | Genes within<br>Ranges |
|------------|-----|--------------|------------------------------|--------|--------|-------------|--------------------|------|--------------|----------|------|--------------|-------------------|------------------------|
|            |     |              |                              |        |        |             | BET<br>A           | SE   | $P$          | BET<br>A | SE   | $P$          |                   |                        |
| rs2983896  | 6   | 9702987<br>1 | chr6:96767685..9707019<br>0  | A      | G      | 0.22        | 0.12               | 0.03 | 8.85E-<br>07 | 0.21     | 0.02 | 1.26E-<br>17 | 8.11E-<br>22      | [FHL5,UFL1]            |
| rs11172113 | 12  | 5752728<br>3 | chr12:57502981..575407<br>51 | T      | C      | 0.45        | 0.10               | 0.02 | 1.11E-<br>06 | -0.12    | 0.02 | 3.02E-<br>08 | 1.58E-<br>10      | [LRP1,STAT6]           |

Abbreviations: CHR: chromosome; BP: physical position; POS: position; A1FREQ: A1 allele frequency; PP: pulse pressure.

Position is under build 37/hg19.

All these loci were genome-wide significant ( $P < 5 \times 10^{-8}$ ) for cross-trait meta-analysis (using heterogenous version of CPASSOC, SHet) and  $P < 1 \times 10^{-5}$  for single trait GWAS.

**Supplementary Table 12 Genome-wide significant loci shared between migraine without aura and diastolic blood pressure (DBP) from cross-trait meta-analysis using CPASSOC ( $P_{\text{meta}} \leq 5 \times 10^{-8}$ )**

| SNP            | CHR | BP            | POS                           | A<br>1 | A<br>2 | A1FREQ<br>1 | Migraine without aura |      |              | DBP      |     |              | $P_{\text{meta}}$ | Genes within Ranges                                                                                                                                                                                          |
|----------------|-----|---------------|-------------------------------|--------|--------|-------------|-----------------------|------|--------------|----------|-----|--------------|-------------------|--------------------------------------------------------------------------------------------------------------------------------------------------------------------------------------------------------------|
|                |     |               |                               |        |        |             | BET<br>A              | SE   | $P$          | BET<br>A | SE  | $P$          |                   |                                                                                                                                                                                                              |
| rs2274319      | 1   | 15645087<br>3 | chr1:156450873..1565006<br>04 | T      | C      | 0.64        | 0.09                  | 0.02 | 2.45E-<br>06 | 0.10     | 0.0 | 1.65E-<br>07 | 7.57E-<br>10      | [IQGAP3,MEF2D]                                                                                                                                                                                               |
| rs4141663      | 3   | 12455196<br>7 | chr3:124331571..1246488<br>20 | T      | C      | 0.44        | 0.08                  | 0.02 | 8.18E-<br>06 | -0.15    | 0.0 | 1.41E-<br>17 | 5.36E-<br>22      | [ITGB5,KALRN,MUC13,UMPS]                                                                                                                                                                                     |
| rs3499533<br>4 | 6   | 12184567<br>9 | chr6:121782750..1218488<br>41 | A      | G      | 0.17        | -0.12                 | 0.03 | 1.44E-<br>06 | 0.11     | 0.0 | 3.27E-<br>06 | 3.96E-<br>08      | Intergenic                                                                                                                                                                                                   |
| rs3798293      | 6   | 97033370      | chr6:96786215..97067047       | A      | G      | 0.22        | -0.15                 | 0.02 | 5.99E-<br>12 | -0.13    | 0.0 | 2.70E-<br>10 | 8.21E-<br>15      | [FHL5,UFL1]<br>[ATP1B2,CD68,DNAH2,EFNB3,<br>EIF4A1,FXR2,MPDU1,POLR2A,<br>RPL29P2,SAT2,SENP3,SENP3-<br>EIF4A1,SHBG,SNORA48,SNOR<br>A67,SNORD10,SOX15,TNFSF12,<br>TNFSF12-<br>TNFSF13,TNFSF13,TP53,WRAP<br>53] |
| rs7837822<br>2 | 17  | 7571752       | chr17:7417640..7700063        | T      | G      | 0.02        | -0.34                 | 0.07 | 2.91E-<br>06 | -0.61    | 0.0 | 1.71E-<br>14 | 1.80E-<br>18      |                                                                                                                                                                                                              |

Abbreviations: CHR: chromosome; BP: physical position; POS: position; A1FREQ: A1 allele frequency; DBP: diastolic blood pressure.

Position is under build 37/hg19.

All these loci were genome-wide significant ( $P < 5 \times 10^{-8}$ ) for cross-trait meta-analysis (using heterogenous version of CPASSOC, SHet) and  $P < 1 \times 10^{-5}$  for single trait GWAS.

**Supplementary Table 13 Genome-wide significant loci shared between migraine without aura and systolic blood pressure (SBP) from cross-trait meta-analysis using CPASSOC ( $P_{\text{meta}} \leq 5 \times 10^{-08}$ )**

| SNP       | CHR | BP        | POS                       | A1 | A2 | A1FREQ | Migraine without aura |      |          | SBP  |      |          | $P_{\text{meta}}$ | Genes within Ranges |
|-----------|-----|-----------|---------------------------|----|----|--------|-----------------------|------|----------|------|------|----------|-------------------|---------------------|
|           |     |           |                           |    |    |        | BETA                  | SE   | P        | BETA | SE   | P        |                   |                     |
| rs2274319 | 1   | 156450873 | chr1:156439000..156474119 | T  | C  | 0.64   | 0.09                  | 0.02 | 2.45E-06 | 0.16 | 0.03 | 2.47E-07 | 1.14E-08          | [MEF2D]             |
| rs2983896 | 6   | 97029871  | chr6:96767685..97081432   | A  | G  | 0.22   | 0.15                  | 0.02 | 5.82E-12 | 0.34 | 0.04 | 1.61E-20 | 1.45E-24          | [FHL5,UFL1]         |
| rs7454157 | 6   | 12909874  | chr6:12764286..12948388   | A  | G  | 0.35   | 0.11                  | 0.02 | 8.20E-08 | 0.21 | 0.03 | 1.31E-11 | 9.53E-14          | [PHACTR1]           |

Abbreviations: CHR: chromosome; BP: physical position; POS: position; A1FREQ: A1 allele frequency; SBP: systolic blood pressure.

Position is under build 37/hg19.

All these loci were genome-wide significant ( $P < 5 \times 10^{-8}$ ) for cross-trait meta-analysis (using heterogenous version of CPASSOC, SHet) and  $P < 1 \times 10^{-5}$  for single trait GWAS.

**Supplementary Table 14 Genome-wide significant loci shared between migraine without aura and pulse pressure (PP) from cross-trait meta-analysis using CPASSOC ( $P_{\text{meta}} \leq 5 \times 10^{-08}$ )**

| SNP        | CHR | BP        | POS                       | A1 | A2 | A1FREQ1 | Migraine without aura |      |          | PP    |      |          | $P_{\text{meta}}$ | Genes within Ranges                                                                                                                                                         |
|------------|-----|-----------|---------------------------|----|----|---------|-----------------------|------|----------|-------|------|----------|-------------------|-----------------------------------------------------------------------------------------------------------------------------------------------------------------------------|
|            |     |           |                           |    |    |         | BETA                  | SE   | $P$      | BETA  | SE   | $P$      |                   |                                                                                                                                                                             |
| rs11172113 | 12  | 57527283  | chr12:57362422..57540751  | T  | C  | 0.45    | 0.16                  | 0.02 | 4.27E-16 | -0.12 | 0.02 | 3.02E-08 | 1.68E-17          | [GPR182, <b>LRP1</b> ,MYO1A,NAB2,STAT6,TAC3,TMEM194A,ZBTB39]                                                                                                                |
| rs12631961 | 3   | 124561848 | chr3:124450321..124648336 | T  | C  | 0.42    | 0.09                  | 0.02 | 5.16E-06 | -0.13 | 0.02 | 6.51E-10 | 8.23E-13          | [ <b>ITGB5</b> ,MUC13,UMPS]                                                                                                                                                 |
| rs1332844  | 6   | 12889004  | chr6:12762814..13052693   | T  | C  | 0.65    | -0.10                 | 0.02 | 1.95E-07 | -0.20 | 0.02 | 6.95E-22 | 2.84E-28          | [ <b>PHACTR1</b> ]                                                                                                                                                          |
| rs2983896  | 6   | 97029871  | chr6:96767685..97070190   | A  | G  | 0.22    | 0.15                  | 0.02 | 5.82E-12 | 0.21  | 0.02 | 1.26E-17 | 1.52E-24          | [ <b>FHL5</b> ,UFL1]                                                                                                                                                        |
| rs78378222 | 17  | 7571752   | chr17:7417640..7700063    | T  | G  | 0.02    | -0.34                 | 0.07 | 2.91E-06 | 1.05  | 0.09 | 1.28E-28 | 7.32E-36          | [ATP1B2,CD68,DNAH2,EFNB3,EIF4A1,FXR2,MPDU1,POLR2A,RPL29P2,SAT2,SENP3,SENP3-EIF4A1,SHBG,SNORA48,SNO RA67,SNORD10,SOX15,TNFSF12,TNFSF12-TNFSF13,TNFSF13, <b>TP53</b> ,WRAP53] |
| rs80080721 | 17  | 47777540  | chr17:47661137..47964202  | T  | G  | 0.11    | 0.13                  | 0.03 | 8.98E-06 | -0.18 | 0.03 | 9.88E-09 | 2.70E-11          | [FAM117A,FLJ45513,KAT7,NXPH3, <b>SLC35B1</b> ,SPOB,TAC4]                                                                                                                    |

Abbreviations: CHR: chromosome; BP: physical position; POS: position; A1FREQ: A1 allele frequency; PP: pulse pressure.

Position is under build 37/hg19.

All these loci were genome-wide significant ( $P < 5 \times 10^{-8}$ ) for cross-trait meta-analysis (using heterogenous version of CPASSOC, SHet) and  $P < 1 \times 10^{-5}$  for single trait GWAS.

**Supplementary Table 15 The conditional/joint significant shared TWAS genes between migraine and diastolic blood pressure (DBP)**

| ID       | CHR | Migraine                      |              |                        |                  | DBP                                 |              |        |                  |
|----------|-----|-------------------------------|--------------|------------------------|------------------|-------------------------------------|--------------|--------|------------------|
|          |     | Tissue                        | BEST.GWAS.ID | TWAS.Z                 | $P_{Bonferroni}$ | Tissue                              | BEST.GWAS.ID | TWAS.Z | $P_{Bonferroni}$ |
| KIAA0040 | 1   | Artery_Tibial                 | rs2272784    | 5.00                   | 4.75E-03         | Skin_Sun_Exposed_Lower_leg          | rs2272784    | 6.08   | 1.02E-05         |
|          |     |                               |              |                        |                  | Skin_Not_Sun_Exposed_Suprapubic     | rs2272784    | 5.95   | 2.00E-05         |
| TSPAN2   | 1   | Artery_Aorta                  | rs2078371    | 9.72                   | 1.54E-18         | Minor_Salivary_Gland                | rs11466111   | -4.19  | 0.05             |
|          |     | Artery_Tibial                 | rs2078371    | 7.20                   | 5.01E-09         |                                     |              |        |                  |
| ADRA2B   | 2   | Skin_Sun_Exposed_Lower_leg    | rs11695514   | -5.07                  | 3.45E-03         | Esophagus_Gastroesophageal_Junction | rs1813381    | 11.21  | 1.82E-25         |
|          |     |                               |              |                        |                  | Skin_Not_Sun_Exposed_Suprapubic     | rs1813381    | 11.06  | 1.42E-24         |
|          |     |                               |              |                        |                  | Adipose_Visceral_Omentum            | rs1813381    | 10.95  | 4.18E-24         |
|          |     |                               |              |                        |                  | Thyroid                             | rs1813381    | 10.80  | 3.30E-23         |
|          |     |                               |              |                        |                  | Adipose_Subcutaneous                | rs1813381    | 10.68  | 9.83E-23         |
|          |     |                               |              |                        |                  | Stomach                             | rs1813381    | 10.52  | 2.92E-22         |
|          |     |                               |              |                        |                  | Colon_Transverse                    | rs1813381    | 10.52  | 3.67E-22         |
|          |     |                               |              |                        |                  | Skin_Sun_Exposed_Lower_leg          | rs1813381    | 10.31  | 5.77E-21         |
|          |     |                               |              |                        |                  | Spleen                              | rs1813381    | 10.24  | 5.73E-21         |
|          |     |                               |              |                        |                  | Nerve_Tibial                        | rs1813381    | 10.23  | 1.36E-20         |
|          |     |                               |              |                        |                  | Breast_Mammary_Tissue               | rs1813381    | 10.20  | 1.01E-20         |
|          |     |                               |              |                        |                  | Esophagus_Muscularis                | rs1813381    | 10.18  | 1.88E-20         |
|          |     |                               |              |                        |                  | Heart_Left_Ventricle                | rs1813381    | 10.11  | 2.41E-20         |
|          |     |                               |              |                        |                  | Muscle_Skeletal                     | rs1813381    | 9.86   | 4.52E-19         |
|          |     |                               |              | Heart_Atrial_Appendage | rs1813381        | 9.78                                | 7.52E-19     |        |                  |
|          |     |                               |              | Testis                 | rs1813381        | -6.44                               | 1.06E-06     |        |                  |
|          |     |                               |              | Lung                   | rs1813381        | 6.31                                | 2.11E-06     |        |                  |
|          |     |                               |              | Brain_Cerebellum       | rs1813381        | -5.81                               | 3.69E-05     |        |                  |
|          |     |                               |              | Artery_Aorta           | rs1813381        | -5.02                               | 3.34E-03     |        |                  |
| ITGB5    | 3   | Artery_Coronary               | rs4141663    | 4.58                   | 0.01             | Artery_Coronary                     | rs4141663    | -9.09  | 3.15E-16         |
|          |     | Artery_Tibial                 | rs4141663    | 4.77                   | 0.01             | Artery_Tibial                       | rs4141663    | -8.46  | 2.14E-13         |
|          |     | Cells_Transformed_fibroblasts | rs4141663    | -5.27                  | 9.99E-04         | Colon_Sigmoid                       | rs4141663    | -8.35  | 3.31E-13         |
|          |     | Esophagus_Mucosa              | rs4141663    | -5.35                  | 6.86E-04         | Esophagus_Muscularis                | rs4141663    | -8.27  | 9.94E-13         |

|              |   |                                       |           |       |          |                                     |            |       |          |
|--------------|---|---------------------------------------|-----------|-------|----------|-------------------------------------|------------|-------|----------|
|              |   | Nerve_Tibial                          | rs4141663 | 5.08  | 3.54E-03 | Nerve_Tibial                        | rs4141663  | -8.27 | 1.26E-12 |
|              |   |                                       |           |       |          | Esophagus_Gastroesophageal_Junction | rs4141663  | -8.20 | 1.15E-12 |
|              |   |                                       |           |       |          | Artery_Aorta                        | rs4141663  | -8.09 | 3.77E-12 |
|              |   |                                       |           |       |          | Esophagus_Mucosa                    | rs4141663  | 7.77  | 6.21E-11 |
|              |   |                                       |           |       |          | Brain_Hypothalamus                  | rs4141663  | -6.57 | 1.14E-07 |
|              |   |                                       |           |       |          | Muscle_Skeletal                     | rs4141663  | -4.52 | 0.05     |
| RP11-71H17.9 | 3 | Brain_Cerebellum                      | rs4141663 | -4.81 | 0.01     | Brain_Cerebellum                    | rs4141663  | 5.14  | 1.60E-03 |
|              |   | Brain_Nucleus_accumbens_basal_ganglia | rs4141663 | -4.50 | 0.02     | Ovary                               | rs4141663  | 4.39  | 0.03     |
|              |   | Artery_Tibial                         | rs7694724 | 4.61  | 0.03     | Ovary                               | rs13116385 | 8.31  | 2.53E-13 |
|              |   |                                       |           |       |          | Colon_Sigmoid                       | rs13116385 | 7.87  | 1.64E-11 |
|              |   |                                       |           |       |          | Esophagus_Mucosa                    | rs13116385 | 7.87  | 2.86E-11 |
|              |   |                                       |           |       |          | Nerve_Tibial                        | rs13116385 | 7.63  | 2.28E-10 |
|              |   |                                       |           |       |          | Skin_Sun_Exposed_Lower_leg          | rs13116385 | 7.39  | 1.24E-09 |
|              |   |                                       |           |       |          | Breast_Mammary_Tissue               | rs13116385 | 7.28  | 1.64E-09 |
|              |   |                                       |           |       |          | Cells_Transformed_fibroblasts       | rs13116385 | 7.16  | 5.83E-09 |
|              |   |                                       |           |       |          | Esophagus_Muscularis                | rs13116385 | 7.02  | 1.68E-08 |
| CISD2        | 4 |                                       |           |       |          | Thyroid                             | rs13116385 | 6.90  | 4.99E-08 |
|              |   |                                       |           |       |          | Brain_Hippocampus                   | rs13116385 | 6.70  | 4.53E-08 |
|              |   |                                       |           |       |          | Uterus                              | rs13116385 | 6.56  | 1.11E-07 |
|              |   |                                       |           |       |          | Brain_Cerebellar_Hemisphere         | rs13116385 | 6.44  | 5.24E-07 |
|              |   |                                       |           |       |          | Adipose_Visceral_Omentum            | rs13116385 | 6.33  | 1.53E-06 |
|              |   |                                       |           |       |          | Artery_Tibial                       | rs13116385 | 5.84  | 4.11E-05 |
|              |   |                                       |           |       |          | Adipose_Subcutaneous                | rs13116385 | 5.76  | 6.59E-05 |
|              |   |                                       |           |       |          | Lung                                | rs13116385 | 5.48  | 3.25E-04 |
|              |   |                                       |           |       |          | Skin_Not_Sun_Exposed_Suprapubic     | rs13116385 | 4.83  | 0.01     |
|              |   | Esophagus_Mucosa                      | rs34358   | -4.85 | 0.01     | Esophagus_Mucosa                    | rs2307111  | -9.47 | 2.19E-17 |
|              |   | Nerve_Tibial                          | rs34358   | -4.65 | 0.03     | Thyroid                             | rs2307111  | -8.99 | 2.41E-15 |
| ANKDD1B      | 5 |                                       |           |       | 0.03     | Nerve_Tibial                        | rs2307111  | -8.72 | 2.61E-14 |
|              |   |                                       |           |       | 0.03     | Brain_Cerebellum                    | rs2307111  | -8.06 | 4.50E-12 |
|              |   |                                       |           |       | 0.03     | Skin_Not_Sun_Exposed_Suprapubic     | rs2307111  | -8.01 | 8.52E-12 |

|      |   |                      |           |       |          |                               |            |       |          |
|------|---|----------------------|-----------|-------|----------|-------------------------------|------------|-------|----------|
|      |   |                      |           |       | 0.03     | Colon_Sigmoid                 | rs2307111  | -7.97 | 7.66E-12 |
|      |   |                      |           |       | 0.03     | Esophagus_Muscularis          | rs2307111  | -7.39 | 1.12E-09 |
|      |   |                      |           |       | 0.03     | Skin_Sun_Exposed_Lower_leg    | rs2307111  | -6.64 | 2.81E-07 |
|      |   |                      |           |       | 0.03     | Cells_Transformed_fibroblasts | rs2307111  | -6.28 | 2.51E-06 |
|      |   |                      |           |       | 0.03     | Brain_Cerebellar_Hemisphere   | rs2307111  | -6.16 | 3.17E-06 |
| GJA1 | 6 | Artery_Tibial        | rs9320821 | 5.33  | 7.94E-04 | Artery_Aorta                  | rs6932373  | -8.78 | 1.08E-14 |
|      |   | Adipose_Subcutaneous | rs2983896 | 9.95  | 2.01E-19 | Spleen                        | rs11756315 | 6.17  | 2.97E-06 |
|      |   | Artery_Tibial        | rs2983896 | 10.14 | 2.99E-20 | Nerve_Tibial                  | rs11756315 | 6.09  | 1.09E-05 |
|      |   | Brain_Cerebellum     | rs2983896 | 9.49  | 1.32E-17 | Pancreas                      | rs11756315 | 5.74  | 4.64E-05 |
|      |   | Nerve_Tibial         | rs2983896 | 9.81  | 1.02E-18 | Whole_Blood                   | rs11756315 | 5.68  | 8.01E-05 |
| UFL1 | 6 | Pancreas             | rs2983896 | 10.44 | 8.56E-22 | Stomach                       | rs11756315 | 5.55  | 1.24E-04 |
|      |   | Spleen               | rs2983896 | 9.18  | 1.87E-16 | Artery_Tibial                 | rs11756315 | 5.52  | 2.69E-04 |
|      |   | Stomach              | rs2983896 | 8.98  | 1.20E-15 | Adipose_Subcutaneous          | rs11756315 | 5.47  | 3.59E-04 |
|      |   | Vagina               | rs2983896 | 7.52  | 1.06E-10 |                               |            |       |          |
|      |   | Whole_Blood          | rs2983896 | 7.16  | 4.85E-09 |                               |            |       |          |
|      |   | Vagina               | rs495828  | 4.42  | 0.02     | Artery_Aorta                  | rs579459   | -8.28 | 7.86E-13 |
|      |   |                      |           |       |          | Adrenal_Gland                 | rs579459   | -7.83 | 2.21E-11 |
|      |   |                      |           |       |          | Whole_Blood                   | rs579459   | 7.82  | 3.07E-11 |
|      |   |                      |           |       |          | Artery_Tibial                 | rs579459   | -7.26 | 3.15E-09 |
|      |   |                      |           |       |          | Artery_Coronary               | rs579459   | -7.23 | 1.48E-09 |
|      |   |                      |           |       |          | Breast_Mammary_Tissue         | rs579459   | -6.95 | 1.84E-08 |
|      |   |                      |           |       |          | Colon_Sigmoid                 | rs579459   | -6.72 | 9.00E-08 |
| ABO  | 9 |                      |           |       |          | Pituitary                     | rs579459   | -6.56 | 2.25E-07 |
|      |   |                      |           |       |          | Heart_Atrial_Appendage        | rs579459   | -6.48 | 5.13E-07 |
|      |   |                      |           |       |          | Vagina                        | rs579459   | -6.46 | 2.11E-07 |
|      |   |                      |           |       |          | Adipose_Subcutaneous          | rs579459   | -6.13 | 6.89E-06 |
|      |   |                      |           |       |          | Adipose_Visceral_Omentum      | rs579459   | -6.05 | 8.67E-06 |
|      |   |                      |           |       |          | Muscle_Skeletal               | rs579459   | -5.67 | 1.06E-04 |
|      |   |                      |           |       |          | Colon_Transverse              | rs579459   | -5.64 | 8.65E-05 |
|      |   |                      |           |       |          | Esophagus_Mucosa              | rs579459   | -5.59 | 1.80E-04 |



|         |    |                                     |           |       |          |                                     |            |       |          |
|---------|----|-------------------------------------|-----------|-------|----------|-------------------------------------|------------|-------|----------|
|         |    |                                     |           |       |          | Brain_Cerebellar_Hemisphere         | rs579459   | -5.36 | 3.52E-04 |
|         |    |                                     |           |       |          | Heart_Left_Ventricle                | rs579459   | -5.34 | 4.55E-04 |
|         |    |                                     |           |       |          | Pancreas                            | rs579459   | -4.97 | 3.35E-03 |
|         |    |                                     |           |       |          | Uterus                              | rs579459   | -4.53 | 0.01     |
| CYP2C9  | 10 | Skin_Not_Sun_Exposed_Suprapubic     | rs7078478 | -5.73 | 7.42E-05 | Skin_Sun_Exposed_Lower_leg          | rs11187960 | -8.69 | 3.11E-14 |
|         |    | Skin_Sun_Exposed_Lower_leg          | rs7078478 | -4.56 | 0.04     | Skin_Not_Sun_Exposed_Suprapubic     | rs11187960 | -8.25 | 1.16E-12 |
|         |    | Artery_Tibial                       | rs4909945 | 6.95  | 2.99E-08 | Artery_Tibial                       | rs10840378 | -6.59 | 3.50E-07 |
| MRVI1   | 11 |                                     |           |       |          | Esophagus_Muscularis                | rs10840378 | 6.54  | 4.75E-07 |
|         |    |                                     |           |       |          | Brain_Substantia_nigra              | rs10840378 | 6.51  | 1.19E-07 |
|         |    |                                     |           |       |          | Brain_Cerebellum                    | rs10840378 | 6.04  | 8.92E-06 |
|         |    |                                     |           |       |          | Brain_Cortex                        | rs10840378 | 5.76  | 3.32E-05 |
| C12orf5 | 12 | Artery_Tibial                       | rs2160875 | 5.44  | 4.28E-04 | Nerve_Tibial                        | rs3217926  | 5.05  | 4.28E-03 |
|         |    | Stomach                             | rs2160875 | 4.45  | 0.04     |                                     |            |       |          |
|         |    | Adipose_Subcutaneous                | rs4888378 | 5.24  | 1.29E-03 | Brain_Hippocampus                   | rs766521   | -7.20 | 1.37E-09 |
|         |    | Adipose_Visceral_Omentum            | rs4888378 | 4.52  | 0.04     | Cells_Transformed_fibroblasts       | rs766521   | -6.84 | 5.70E-08 |
|         |    | Adrenal_Gland                       | rs4888378 | 4.40  | 0.05     | Nerve_Tibial                        | rs766521   | -6.15 | 7.32E-06 |
|         |    | Artery_Coronary                     | rs4888378 | 4.64  | 0.01     | Brain_Cerebellum                    | rs766521   | -5.56 | 1.58E-04 |
|         |    | Brain_Cortex                        | rs4888378 | 4.86  | 4.61E-03 | Muscle_Skeletal                     | rs766521   | -4.95 | 0.01     |
|         |    | Brain_Hippocampus                   | rs4888378 | 6.02  | 3.97E-06 | Breast_Mammary_Tissue               | rs766521   | -4.78 | 0.01     |
|         |    | Breast_Mammary_Tissue               | rs4888378 | 5.49  | 2.01E-04 | Artery_Coronary                     | rs766521   | -4.75 | 0.01     |
|         |    | Cells_EBV-transformed_lymphocytes   | rs4888378 | 5.00  | 1.57E-03 | Adipose_Subcutaneous                | rs766521   | -4.73 | 0.02     |
| CFDP1   | 16 | Cells_Transformed_fibroblasts       | rs4888378 | 6.34  | 1.69E-06 | Brain_Cortex                        | rs766521   | -4.64 | 0.01     |
|         |    | Colon_Sigmoid                       | rs4888378 | 4.84  | 0.01     | Esophagus_Gastroesophageal_Junction | rs766521   | -4.64 | 0.02     |
|         |    | Esophagus_Gastroesophageal_Junction | rs4888378 | 4.82  | 0.01     | Pancreas                            | rs766521   | -4.45 | 0.04     |
|         |    | Esophagus_Muscularis                | rs4888378 | 4.73  | 0.02     | Colon_Sigmoid                       | rs766521   | -4.44 | 0.04     |
|         |    | Lung                                | rs4888378 | 4.60  | 0.03     | Cells_EBV-transformed_lymphocytes   | rs766521   | -4.43 | 0.03     |
|         |    | Muscle_Skeletal                     | rs4888378 | 5.44  | 3.82E-04 |                                     |            |       |          |
|         |    | Nerve_Tibial                        | rs4888378 | 5.97  | 2.32E-05 |                                     |            |       |          |
|         |    | Pancreas                            | rs4888378 | 5.39  | 3.55E-04 |                                     |            |       |          |
|         |    | Skin_Not_Sun_Exposed_Suprapubic     | rs4888378 | 5.17  | 1.67E-03 |                                     |            |       |          |

|         |    |                 |           |       |          |                 |           |      |          |
|---------|----|-----------------|-----------|-------|----------|-----------------|-----------|------|----------|
|         |    | Stomach         | rs4888378 | 4.55  | 0.02     |                 |           |      |          |
| SLC24A3 | 20 | Artery_Aorta    | rs4814863 | -7.38 | 9.77E-10 | Artery_Aorta    | rs4814858 | 5.32 | 6.53E-04 |
|         |    | Artery_Coronary | rs4814863 | -6.75 | 4.76E-08 | Artery_Coronary | rs4814858 | 5.19 | 6.72E-04 |
|         |    | Artery_Tibial   | rs4814863 | -8.43 | 2.77E-13 |                 |           |      |          |

Abbreviations: CHR: chromosome; DBP: diastolic blood pressure.

All these loci were TWAS significant ( $P_{\text{Bonferroni}} < 0.05$ ) for both migraine and blood pressure in at least one GTEx tissues, and significant from TWAS conditional/joint analysis for both traits.

**Supplementary Table 16 The conditional/joint significant shared TWAS genes between migraine and systolic blood pressure (SBP)**

| ID          | CHR | Migraine                      |              |        |                         | SBP                                 |              |        |                         |
|-------------|-----|-------------------------------|--------------|--------|-------------------------|-------------------------------------|--------------|--------|-------------------------|
|             |     | Tissue                        | BEST.GWAS.ID | TWAS.Z | $P_{\text{Bonferroni}}$ | Tissue                              | BEST.GWAS.ID | TWAS.Z | $P_{\text{Bonferroni}}$ |
| ITGB5       | 3   | Artery_Coronary               | rs4141663    | 4.58   | 0.01                    | Artery_Coronary                     | rs4141663    | -9.27  | 5.71E-17                |
|             |     | Artery_Tibial                 | rs4141663    | 4.77   | 0.01                    | Artery_Tibial                       | rs4141663    | -8.88  | 5.18E-15                |
|             |     | Cells_Transformed_fibroblasts | rs4141663    | -5.27  | 9.99E-04                | Esophagus_Muscularis                | rs4141663    | -8.64  | 4.31E-14                |
|             |     | Esophagus_Mucosa              | rs4141663    | -5.35  | 6.86E-04                | Nerve_Tibial                        | rs4141663    | -8.65  | 4.85E-14                |
|             |     | Nerve_Tibial                  | rs4141663    | 5.08   | 3.54E-03                | Artery_Aorta                        | rs4141663    | -8.56  | 7.23E-14                |
|             |     |                               |              |        |                         | Esophagus_Gastroesophageal_Junction | rs4141663    | -8.52  | 7.42E-14                |
|             |     |                               |              |        |                         | Colon_Sigmoid                       | rs4141663    | -8.25  | 7.56E-13                |
|             |     |                               |              |        |                         | Esophagus_Mucosa                    | rs4141663    | 7.77   | 6.42E-11                |
|             |     |                               |              |        |                         | Brain_Hypothalamus                  | rs4141663    | -7.13  | 2.19E-09                |
| SNX24       | 5   | Artery_Aorta                  | rs13172078   | -4.91  | 0.01                    | Adrenal_Gland                       | rs1644318    | -6.69  | 9.60E-08                |
|             |     |                               |              |        |                         | Skin_Sun_Exposed_Lower_leg          | rs1644318    | -5.54  | 2.58E-04                |
|             |     |                               |              |        |                         | Artery_Aorta                        | rs1644318    | -5.12  | 1.91E-03                |
| RP1-257A7.5 | 6   | Artery_Aorta                  | rs9349379    | 9.61   | 4.61E-18                | Artery_Tibial                       | rs9349379    | 8.60   | 6.28E-14                |
|             |     | Artery_Coronary               | rs9349379    | 7.62   | 7.96E-11                | Artery_Aorta                        | rs9349379    | 8.54   | 8.50E-14                |
|             |     | Artery_Tibial                 | rs9349379    | 9.72   | 2.10E-18                | Artery_Coronary                     | rs9349379    | 7.12   | 3.36E-09                |
| UFL1        | 6   | Adipose_Subcutaneous          | rs2983896    | 9.95   | 2.01E-19                | Spleen                              | rs2983896    | 9.17   | 1.99E-16                |
|             |     | Artery_Tibial                 | rs2983896    | 10.14  | 2.99E-20                | Nerve_Tibial                        | rs2983896    | 9.15   | 5.60E-16                |
|             |     | Brain_Cerebellum              | rs2983896    | 9.49   | 1.32E-17                | Pancreas                            | rs2983896    | 9.00   | 1.16E-15                |
|             |     | Nerve_Tibial                  | rs2983896    | 9.81   | 1.02E-18                | Whole_Blood                         | rs2983896    | 8.51   | 1.05E-13                |
|             |     | Pancreas                      | rs2983896    | 10.44  | 8.56E-22                | Stomach                             | rs2983896    | 8.10   | 2.43E-12                |
|             |     | Spleen                        | rs2983896    | 9.18   | 1.87E-16                | Artery_Tibial                       | rs2983896    | 7.69   | 1.16E-10                |
|             |     | Stomach                       | rs2983896    | 8.98   | 1.20E-15                | Adipose_Subcutaneous                | rs2983896    | 7.57   | 2.98E-10                |
|             |     | Vagina                        | rs2983896    | 7.52   | 1.06E-10                | Brain_Cerebellum                    | rs2983896    | 6.46   | 5.92E-07                |
|             |     | Whole_Blood                   | rs2983896    | 7.16   | 4.85E-09                | Vagina                              | rs2983896    | 4.68   | 0.01                    |
| C7orf10     | 7   | Artery_Aorta                  | rs12533531   | -7.76  | 5.35E-11                | Artery_Aorta                        | rs17171710   | 8.21   | 1.37E-12                |
| RBM20       | 10  | Brain_Cortex                  | rs10885035   | 4.46   | 0.03                    | Artery_Tibial                       | rs2419577    | -4.92  | 0.01                    |
|             |     |                               |              |        |                         | Brain_Substantia_nigra              | rs2419577    | -4.39  | 0.02                    |

|         |    |                                   |           |                          |            |                                       |            |       |          |
|---------|----|-----------------------------------|-----------|--------------------------|------------|---------------------------------------|------------|-------|----------|
| MRVI1   | 11 | Artery_Tibial                     | rs4909945 | 6.95                     | 2.99E-08   | Esophagus_Muscularis                  | rs1470260  | 7.17  | 5.68E-09 |
|         |    |                                   |           |                          |            | Brain_Substantia_nigra                | rs1470260  | 5.39  | 1.12E-04 |
|         |    |                                   |           |                          |            | Brain_Cerebellum                      | rs1470260  | 5.27  | 7.65E-04 |
|         |    |                                   |           |                          |            | Brain_Cortex                          | rs1470260  | 5.12  | 1.20E-03 |
| SMG6    | 17 | Esophagus_Mucosa                  | rs2236375 | -4.63                    | 0.03       | Esophagus_Mucosa                      | rs8069947  | -7.84 | 3.60E-11 |
|         |    |                                   |           |                          |            | Brain_Cerebellum                      | rs8069947  | -6.64 | 1.85E-07 |
|         |    |                                   |           |                          |            | Brain_Cortex                          | rs8069947  | -6.12 | 3.71E-06 |
|         |    |                                   |           |                          |            | Testis                                | rs8069947  | -5.13 | 2.57E-03 |
|         |    |                                   |           |                          |            | Skin_Sun_Exposed_Lower_leg            | rs8069947  | -4.87 | 0.01     |
| DMPK    | 19 | Pancreas                          | rs1548029 | 4.45                     | 0.04       | Pancreas                              | rs7256192  | 7.19  | 3.17E-09 |
|         |    |                                   |           |                          |            | Artery_Tibial                         | rs7256192  | 6.56  | 4.49E-07 |
|         |    |                                   |           |                          |            | Artery_Aorta                          | rs7256192  | 6.20  | 3.49E-06 |
|         |    |                                   |           |                          |            | Adipose_Subcutaneous                  | rs7256192  | 6.24  | 3.62E-06 |
|         |    |                                   |           |                          |            | Thyroid                               | rs7256192  | 5.61  | 1.97E-04 |
|         |    |                                   |           |                          |            | Esophagus_Mucosa                      | rs7256192  | 5.57  | 2.06E-04 |
|         |    |                                   |           |                          |            | Prostate                              | rs7256192  | 5.35  | 2.37E-04 |
|         |    |                                   |           |                          |            | Nerve_Tibial                          | rs7256192  | 5.02  | 4.84E-03 |
|         |    |                                   |           |                          |            | Skin_Sun_Exposed_Lower_leg            | rs7256192  | 5.00  | 0.01     |
|         |    |                                   |           |                          |            | Breast_Mammary_Tissue                 | rs7256192  | 4.69  | 0.01     |
|         |    |                                   |           |                          |            | Whole_Blood                           | rs7256192  | 4.67  | 0.02     |
|         |    |                                   |           |                          |            | Lung                                  | rs7256192  | 4.71  | 0.02     |
|         |    |                                   |           |                          |            | Skin_Not_Sun_Exposed_Suprapubic       | rs7256192  | 4.56  | 0.04     |
|         |    |                                   |           | Adipose_Visceral_Omentum | rs7256192  | 4.49                                  | 0.04       |       |          |
| SLC24A3 | 20 | Artery_Aorta                      | rs4814863 | -7.38                    | 9.77E-10   | Artery_Tibial                         | rs17812022 | -6.31 | 2.26E-06 |
|         |    | Artery_Coronary                   | rs4814863 | -6.75                    | 4.76E-08   | Artery_Aorta                          | rs17812022 | -4.57 | 0.03     |
|         |    | Artery_Tibial                     | rs4814863 | -8.43                    | 2.77E-13   |                                       |            |       |          |
| ASCC2   | 22 | Cells_EBV-transformed_lymphocytes | rs5752933 | -4.81                    | 4.11E-03   | Brain_Nucleus_accumbens_basal_ganglia | rs12627866 | 6.18  | 2.01E-06 |
|         |    |                                   |           |                          |            | Artery_Tibial                         | rs12627866 | 6.01  | 1.46E-05 |
|         |    |                                   |           |                          |            | Esophagus_Muscularis                  | rs12627866 | 5.95  | 2.06E-05 |
|         |    |                                   |           | Artery_Aorta             | rs12627866 | 5.92                                  | 2.08E-05   |       |          |

|                             |            |      |          |
|-----------------------------|------------|------|----------|
| Muscle_Skeletal             | rs12627866 | 5.56 | 1.95E-04 |
| Nerve_Tibial                | rs12627866 | 5.50 | 3.66E-04 |
| Brain_Cortex                | rs12627866 | 5.08 | 1.52E-03 |
| Heart_Atrial_Appendage      | rs12627866 | 5.10 | 1.93E-03 |
| Lung                        | rs12627866 | 4.91 | 0.01     |
| Brain_Cerebellar_Hemisphere | rs12627866 | 4.47 | 0.03     |

---

Abbreviations: CHR: chromosome; SBP: systolic blood pressure.

All these loci were TWAS significant ( $P_{\text{Bonferroni}} < 0.05$ ) for both migraine and blood pressure in at least one GTEx tissues, and significant from TWAS conditional/joint analysis for both traits.

**Supplementary Table 17 The conditional/joint significant shared TWAS genes between migraine and pulse pressure (PP)**

| ID          | CHR | Migraine                      |                  |        |                         | PP                                  |                  |        |                         |
|-------------|-----|-------------------------------|------------------|--------|-------------------------|-------------------------------------|------------------|--------|-------------------------|
|             |     | Tissue                        | BEST.GWAS.I<br>D | TWAS.Z | $P_{\text{Bonferroni}}$ | Tissue                              | BEST.GWAS.I<br>D | TWAS.Z | $P_{\text{Bonferroni}}$ |
| MEF2D       | 1   | Artery_Tibial                 | rs1925950        | 7.56   | 3.25E-10                | Artery_Tibial                       | rs1185700        | 5.03   | 3.91E-03                |
|             |     | Artery_Coronary               | rs4141663        | 4.58   | 0.01                    | Artery_Coronary                     | rs4141663        | -6.17  | 2.16E-06                |
|             |     | Artery_Tibial                 | rs4141663        | 4.77   | 0.01                    | Artery_Tibial                       | rs4141663        | -6.20  | 4.62E-06                |
|             |     | Cells_Transformed_fibroblasts | rs4141663        | -5.27  | 9.99E-04                | Artery_Aorta                        | rs4141663        | -5.97  | 1.50E-05                |
|             |     | Esophagus_Mucosa              | rs4141663        | -5.35  | 6.86E-04                | Esophagus_Muscularis                | rs4141663        | -5.93  | 2.30E-05                |
| ITGB5       | 3   | Nerve_Tibial                  | rs4141663        | 5.08   | 3.54E-03                | Esophagus_Gastroesophageal_Junction | rs4141663        | -5.78  | 3.61E-05                |
|             |     |                               |                  |        |                         | Nerve_Tibial                        | rs4141663        | -5.82  | 5.61E-05                |
|             |     |                               |                  |        |                         | Colon_Sigmoid                       | rs4141663        | -5.38  | 3.53E-04                |
|             |     |                               |                  |        |                         | Brain_Hypothalamus                  | rs4141663        | -5.05  | 1.00E-03                |
|             |     |                               |                  |        |                         | Esophagus_Mucosa                    | rs4141663        | 4.92   | 0.01                    |
| SNX24       | 5   | Artery_Aorta                  | rs13172078       | -4.91  | 0.01                    | Adrenal_Gland                       | rs1644318        | -9.30  | 6.33E-17                |
|             |     |                               |                  |        |                         | Muscle_Skeletal                     | rs1644318        | -6.76  | 1.04E-07                |
|             |     |                               |                  |        |                         | Skin_Sun_Exposed_Lower_leg          | rs1644318        | -5.67  | 1.24E-04                |
|             |     |                               |                  |        |                         | Artery_Aorta                        | rs1644318        | -5.29  | 7.80E-04                |
|             |     |                               |                  |        |                         | Brain_Frontal_Cortex_BA9            | rs1644318        | -4.69  | 0.01                    |
| GJA1        | 6   | Artery_Tibial                 | rs9320821        | 5.33   | 7.94E-04                | Adipose_Visceral_Omentum            | rs9401457        | -6.28  | 2.06E-06                |
|             |     |                               |                  |        |                         | Nerve_Tibial                        | rs9401457        | -6.00  | 1.88E-05                |
|             |     |                               |                  |        |                         | Artery_Aorta                        | rs9401457        | 5.38   | 4.69E-04                |
| RP1-257A7.5 | 6   | Artery_Aorta                  | rs9349379        | 9.61   | 4.61E-18                | Artery_Aorta                        | rs9349379        | 12.64  | 7.74E-33                |
|             |     | Artery_Coronary               | rs9349379        | 7.62   | 7.96E-11                | Artery_Tibial                       | rs9349379        | 12.65  | 9.06E-33                |
|             |     | Artery_Tibial                 | rs9349379        | 9.72   | 2.10E-18                | Artery_Coronary                     | rs9349379        | 10.83  | 8.12E-24                |
| UFL1        | 6   | Adipose_Subcutaneous          | rs2983896        | 9.95   | 2.01E-19                | Pancreas                            | rs2983896        | 8.42   | 1.82E-13                |
|             |     | Artery_Tibial                 | rs2983896        | 10.14  | 2.99E-20                | Spleen                              | rs2983896        | 8.28   | 5.29E-13                |
|             |     | Brain_Cerebellum              | rs2983896        | 9.49   | 1.32E-17                | Nerve_Tibial                        | rs2983896        | 8.28   | 1.15E-12                |
|             |     | Nerve_Tibial                  | rs2983896        | 9.81   | 1.02E-18                | Whole_Blood                         | rs2983896        | 7.84   | 2.71E-11                |
|             |     | Pancreas                      | rs2983896        | 10.44  | 8.56E-22                | Stomach                             | rs2983896        | 6.99   | 1.20E-08                |
|             |     | Spleen                        | rs2983896        | 9.18   | 1.87E-16                | Artery_Tibial                       | rs2983896        | 6.69   | 1.87E-07                |
|             |     | Stomach                       | rs2983896        | 8.98   | 1.20E-15                | Adipose_Subcutaneous                | rs2983896        | 6.56   | 4.30E-07                |
|             |     | Vagina                        | rs2983896        | 7.52   | 1.06E-10                | Brain_Cerebellum                    | rs2983896        | 6.03   | 9.43E-06                |
|             |     | Whole_Blood                   | rs2983896        | 7.16   | 4.85E-09                | Vagina                              | rs2983896        | 4.40   | 0.02                    |

|         |    |                                   |            |       |          |                                       |            |        |          |
|---------|----|-----------------------------------|------------|-------|----------|---------------------------------------|------------|--------|----------|
| C7orf10 | 7  | Artery_Aorta                      | rs12533531 | -7.76 | 5.35E-11 | Artery_Aorta                          | rs17171710 | 10.78  | 2.77E-23 |
| RBM20   | 10 | Brain_Cortex                      | rs10885035 | 4.46  | 0.03     | Brain_Substantia_nigra                | rs4918582  | -5.52  | 5.33E-05 |
|         |    |                                   |            |       |          | Artery_Aorta                          | rs4918582  | -4.56  | 0.03     |
| SMG6    | 17 | Esophagus_Mucosa                  | rs2236375  | -4.63 | 0.03     | Esophagus_Mucosa                      | rs1048483  | -8.25  | 1.23E-12 |
|         |    |                                   |            |       |          | Brain_Cortex                          | rs1048483  | -6.81  | 3.86E-08 |
|         |    |                                   |            |       |          | Brain_Cerebellum                      | rs1048483  | -5.11  | 1.89E-03 |
|         |    |                                   |            |       |          | Cells_Transformed_fibroblasts         | rs1048483  | -5.12  | 2.26E-03 |
|         |    |                                   |            |       |          | Adipose_Subcutaneous                  | rs1048483  | -4.57  | 0.04     |
| DMPK    | 19 | Pancreas                          | rs1548029  | 4.45  | 0.04     | Pancreas                              | rs11672660 | 7.58   | 1.70E-10 |
|         |    |                                   |            |       |          | Artery_Tibial                         | rs11672660 | 7.30   | 2.39E-09 |
|         |    |                                   |            |       |          | Artery_Aorta                          | rs11672660 | 7.15   | 5.68E-09 |
|         |    |                                   |            |       |          | Adipose_Subcutaneous                  | rs11672660 | 6.99   | 2.22E-08 |
|         |    |                                   |            |       |          | Esophagus_Mucosa                      | rs11672660 | 6.46   | 8.33E-07 |
|         |    |                                   |            |       |          | Thyroid                               | rs11672660 | 6.28   | 3.22E-06 |
|         |    |                                   |            |       |          | Prostate                              | rs11672660 | 5.96   | 7.02E-06 |
|         |    |                                   |            |       |          | Skin_Sun_Exposed_Lower_leg            | rs11672660 | 5.59   | 1.96E-04 |
|         |    |                                   |            |       |          | Nerve_Tibial                          | rs11672660 | 5.58   | 2.33E-04 |
|         |    |                                   |            |       |          | Breast_Mammary_Tissue                 | rs11672660 | 5.26   | 7.08E-04 |
|         |    |                                   |            |       |          | Lung                                  | rs11672660 | 5.30   | 8.72E-04 |
|         |    |                                   |            |       |          | Whole_Blood                           | rs11672660 | 5.18   | 1.31E-03 |
|         |    |                                   |            |       |          | Skin_Not_Sun_Exposed_Suprapubic       | rs11672660 | 5.13   | 2.12E-03 |
|         |    |                                   |            |       |          | Adipose_Visceral_Omentum              | rs11672660 | 5.06   | 2.54E-03 |
|         |    |                                   |            |       |          | Spleen                                | rs11672660 | 4.69   | 0.01     |
| SLC24A3 | 20 | Artery_Aorta                      | rs4814863  | -7.38 | 9.77E-10 | Artery_Tibial                         | rs3790228  | -12.25 | 1.32E-30 |
|         |    | Artery_Coronary                   | rs4814863  | -6.75 | 4.76E-08 | Artery_Aorta                          | rs3790228  | -10.88 | 8.94E-24 |
|         |    | Artery_Tibial                     | rs4814863  | -8.43 | 2.77E-13 | Artery_Coronary                       | rs3790228  | -7.29  | 9.64E-10 |
|         |    |                                   |            |       |          | Cells_Transformed_fibroblasts         | rs3790228  | -7.37  | 1.25E-09 |
|         |    |                                   |            |       |          | Adipose_Subcutaneous                  | rs3790228  | -6.01  | 1.47E-05 |
| ASCC2   | 22 | Cells_EBV-transformed_lymphocytes | rs5752933  | -4.81 | 4.11E-03 | Brain_Nucleus_accumbens_basal_ganglia | rs16988381 | 6.38   | 5.55E-07 |
|         |    |                                   |            |       |          | Esophagus_Muscularis                  | rs16988381 | 6.44   | 9.18E-07 |
|         |    |                                   |            |       |          | Artery_Aorta                          | rs16988381 | 6.20   | 3.51E-06 |
|         |    |                                   |            |       |          | Artery_Tibial                         | rs16988381 | 6.21   | 4.41E-06 |
|         |    |                                   |            |       |          | Nerve_Tibial                          | rs16988381 | 5.68   | 1.27E-04 |
|         |    |                                   |            |       |          | Brain_Cortex                          | rs16988381 | 5.29   | 4.89E-04 |

|                             |            |      |      |
|-----------------------------|------------|------|------|
| Brain_Cerebellar_Hemisphere | rs16988381 | 4.67 | 0.01 |
| Lung                        | rs16988381 | 4.75 | 0.02 |
| Brain_Cerebellum            | rs16988381 | 4.63 | 0.02 |
| Muscle_Skeletal             | rs16988381 | 4.65 | 0.02 |

---

Abbreviations: CHR: chromosome; PP: pulse pressure.

All these loci were TWAS significant ( $P_{\text{Bonferroni}} < 0.05$ ) for both migraine and blood pressure in at least one GTEx tissues, and significant from TWAS conditional/joint analysis for both traits.



**Supplementary Table 18 The shared TWAS genes between migraine with aura and diastolic blood pressure (DBP)**

| ID           | CHR | Migraine with aura                   |               |                   |                         | DBP                                  |               |        |                         |
|--------------|-----|--------------------------------------|---------------|-------------------|-------------------------|--------------------------------------|---------------|--------|-------------------------|
|              |     | Tissue                               | BEST.GWAS .ID | TWAS.Z            | $P_{\text{Bonferroni}}$ | Tissue                               | BEST.GWAS .ID | TWAS.Z | $P_{\text{Bonferroni}}$ |
| MST1         | 3   | Brain_Anterior_cingulate_cortex_BA24 | rs4855881     | 4.31              | 0.04                    | Spleen                               | rs11130216    | -7.17  | 3.27E-09                |
|              |     |                                      |               |                   |                         | Skin_Sun_Exposed_Lower_leg           | rs11130216    | -7.08  | 1.23E-08                |
|              |     |                                      |               |                   |                         | Heart_Left_Ventricle                 | rs11130216    | -6.48  | 4.44E-07                |
|              |     |                                      |               |                   |                         | Stomach                              | rs11130216    | -6.39  | 7.30E-07                |
|              |     |                                      |               |                   |                         | Lung                                 | rs11130216    | -6.33  | 1.89E-06                |
|              |     |                                      |               |                   |                         | Cells_Transformed_fibroblasts        | rs11130216    | -6.21  | 3.83E-06                |
|              |     |                                      |               |                   |                         | Thyroid                              | rs11130216    | -6.17  | 6.70E-06                |
|              |     |                                      |               |                   |                         | Esophagus_Mucosa                     | rs11130216    | -5.66  | 1.20E-04                |
|              |     |                                      |               |                   |                         | Brain_Cerebellum                     | rs11130216    | -5.65  | 9.09E-05                |
|              |     |                                      |               |                   |                         | Brain_Hypothalamus                   | rs11130216    | -5.45  | 1.15E-04                |
|              |     |                                      |               |                   |                         | Adipose_Subcutaneous                 | rs11130216    | -5.43  | 4.51E-04                |
|              |     |                                      |               |                   |                         | Artery_Coronary                      | rs11130216    | -4.77  | 0.01                    |
|              |     |                                      |               |                   |                         | Brain_Anterior_cingulate_cortex_BA24 | rs11130216    | -4.55  | 0.01                    |
|              |     |                                      |               | Brain_Hippocampus | rs11130216              | -4.28                                | 0.04          |        |                         |
| RP11-624M8.1 | 6   | Brain_Amygdala                       | rs1832937     | -4.22             | 0.04                    | Lung                                 | rs6919947     | -5.19  | 1.58E-03                |
| UFL1         | 6   | Brain_Cerebellum                     | rs13208321    | 4.46              | 0.05                    | Spleen                               | rs11756315    | 6.17   | 2.97E-06                |
|              |     |                                      |               |                   |                         | Nerve_Tibial                         | rs11756315    | 6.09   | 1.09E-05                |
|              |     |                                      |               |                   |                         | Pancreas                             | rs11756315    | 5.74   | 4.64E-05                |
|              |     |                                      |               |                   |                         | Whole_Blood                          | rs11756315    | 5.68   | 8.01E-05                |
|              |     |                                      |               |                   |                         | Stomach                              | rs11756315    | 5.55   | 1.24E-04                |
|              |     |                                      |               |                   |                         | Artery_Tibial                        | rs11756315    | 5.52   | 2.69E-04                |
|              |     |                                      |               |                   |                         | Adipose_Subcutaneous                 | rs11756315    | 5.47   | 3.59E-04                |
| RHOF         | 12  | Minor_Salivary_Gland                 | rs34395322    | 4.49              | 0.01                    | Minor_Salivary_Gland                 | rs11059094    | 4.55   | 0.01                    |
| HMOX2        | 16  | Artery_Tibial                        | rs2304634     | 4.88              | 0.01                    | Spleen                               | rs12446456    | 6.91   | 2.13E-08                |
| PDE6G        | 17  | Muscle_Skeletal                      | rs1122424     | 5.10              | 2.43E-03                | Testis                               | rs11150782    | -4.73  | 0.02                    |

Brain\_Cerebellum

rs11150782

-4.60

0.02

---

Abbreviations: CHR: chromosome; DBP: diastolic blood pressure.

All these loci were TWAS significant ( $P_{\text{Bonferroni}} < 0.05$ ) for both migraine and blood pressure in at least one GTEx tissues.

**Supplementary Table 19 The shared TWAS genes between migraine with aura and systolic blood pressure (SBP)**

| ID   | CHR | Migraine with aura                       |                  |                |                  | SBP                                  |                  |            |                  |
|------|-----|------------------------------------------|------------------|----------------|------------------|--------------------------------------|------------------|------------|------------------|
|      |     | Tissue                                   | BEST.GWAS<br>.ID | TWAS.<br>Z     | $P_{Bonferroni}$ | Tissue                               | BEST.GWAS<br>.ID | TWAS.<br>Z | $P_{Bonferroni}$ |
| MST1 | 3   | Brain_Anterior_cingulate_cortex_BA2<br>4 | rs4855881        | 4.31           | 0.04             | Spleen                               | rs13100791       | -5.74      | 4.22E-05         |
|      |     |                                          |                  |                |                  | Skin_Sun_Exposed_Lower_leg           | rs13100791       | -5.57      | 2.28E-04         |
|      |     |                                          |                  |                |                  | Brain_Hypothalamus                   | rs13100791       | -4.95      | 1.64E-03         |
|      |     |                                          |                  |                |                  | Brain_Cerebellum                     | rs13100791       | -5.09      | 2.06E-03         |
|      |     |                                          |                  |                |                  | Thyroid                              | rs13100791       | -5.04      | 4.45E-03         |
|      |     |                                          |                  |                |                  | Heart_Left_Ventricle                 | rs13100791       | -4.87      | 0.01             |
|      |     |                                          |                  |                |                  | Stomach                              | rs13100791       | -4.70      | 0.01             |
|      |     |                                          |                  |                |                  | Esophagus_Mucosa                     | rs13100791       | -4.70      | 0.02             |
|      |     |                                          |                  |                |                  | Lung                                 | rs13100791       | -4.59      | 0.03             |
|      |     | RP11-624M8.1                             | 6                | Brain_Amygdala | rs1832937        | -4.22                                | 0.04             | Lung       | rs6900852        |
|      |     |                                          |                  |                |                  | Brain_Hippocampus                    | rs6900852        | -5.36      | 1.85E-04         |
|      |     |                                          |                  |                |                  | Brain_Spinal_cord_cervical_c-1       | rs6900852        | -5.06      | 8.17E-04         |
|      |     |                                          |                  |                |                  | Ovary                                | rs6900852        | -5.00      | 1.56E-03         |
|      |     |                                          |                  |                |                  | Brain_Cerebellar_Hemisphere          | rs6900852        | -4.96      | 3.01E-03         |
|      |     |                                          |                  |                |                  | Brain_Anterior_cingulate_cortex_BA24 | rs6900852        | -4.82      | 3.85E-03         |
|      |     |                                          |                  |                |                  | Brain_Hypothalamus                   | rs6900852        | -4.62      | 0.01             |
|      |     |                                          |                  |                |                  | Pancreas                             | rs6900852        | -4.75      | 0.01             |
|      |     |                                          |                  |                |                  | Brain_Amygdala                       | rs6900852        | -4.52      | 0.01             |
|      |     |                                          |                  |                |                  | Nerve_Tibial                         | rs6900852        | -4.85      | 0.01             |
| UFL1 | 6   | Brain_Cerebellum                         | rs13208321       | 4.46           | 0.05             | Thyroid                              | rs6900852        | -4.79      | 0.02             |
|      |     |                                          |                  |                |                  | Esophagus_Gastroesophageal_Junction  | rs6900852        | -4.65      | 0.02             |
|      |     |                                          |                  |                |                  | Spleen                               | rs2983896        | 9.17       | 1.99E-16         |
|      |     |                                          |                  |                |                  | Nerve_Tibial                         | rs2983896        | 9.15       | 5.60E-16         |
|      |     |                                          |                  |                |                  | Pancreas                             | rs2983896        | 9.00       | 1.16E-15         |
|      |     |                                          |                  | Whole_Blood    | rs2983896        | 8.51                                 | 1.05E-13         |            |                  |
|      |     |                                          |                  | Stomach        | rs2983896        | 8.10                                 | 2.43E-12         |            |                  |

|        |    |                      |            |       |      |                                      |            |       |          |
|--------|----|----------------------|------------|-------|------|--------------------------------------|------------|-------|----------|
|        |    |                      |            |       |      | Artery_Tibial                        | rs2983896  | 7.69  | 1.16E-10 |
|        |    |                      |            |       |      | Adipose_Subcutaneous                 | rs2983896  | 7.57  | 2.98E-10 |
|        |    |                      |            |       |      | Brain_Cerebellum                     | rs2983896  | 6.46  | 5.92E-07 |
|        |    |                      |            |       |      | Vagina                               | rs2983896  | 4.68  | 0.01     |
| RHOF   | 12 | Minor_Salivary_Gland | rs34395322 | 4.49  | 0.01 | Minor_Salivary_Gland                 | rs4069666  | 4.51  | 0.01     |
| NMRAL1 | 16 | Adrenal_Gland        | rs2304634  | 4.42  | 0.04 | Brain_Anterior_cingulate_cortex_BA24 | rs12446456 | 4.41  | 0.03     |
|        |    | Artery_Tibial        | rs2304634  | 4.88  | 0.01 | Spleen                               | rs12446456 | 9.22  | 1.26E-16 |
| HMOX2  | 16 |                      |            |       |      | Adipose_Visceral_Omentum             | rs12446456 | 6.16  | 4.33E-06 |
|        |    |                      |            |       |      | Brain_Cerebellum                     | rs12446456 | 4.96  | 4.16E-03 |
|        |    |                      |            |       |      | Thyroid                              | rs12446456 | 4.63  | 0.04     |
|        |    | Muscle_Skeletal      | rs2304634  | 4.58  | 0.03 | Brain_Anterior_cingulate_cortex_BA24 | rs12446456 | 4.41  | 0.03     |
| NMRAL1 | 16 | Prostate             | rs2304634  | 4.42  | 0.03 |                                      |            |       |          |
|        |    | Thyroid              | rs2304634  | 4.77  | 0.02 |                                      |            |       |          |
|        |    | Whole_Blood          | rs2304634  | -4.47 | 0.05 | Spleen                               | rs9935080  | -4.73 | 0.01     |
| PAM16  | 16 |                      |            |       |      | Stomach                              | rs9935080  | -4.61 | 0.02     |
|        |    |                      |            |       |      | Heart_Left_Ventricle                 | rs9935080  | 4.48  | 0.04     |

Abbreviations: CHR: chromosome; SBP: systolic blood pressure.

All these loci were TWAS significant ( $P_{\text{Bonferroni}} < 0.05$ ) for both migraine and blood pressure in at least one GTEx tissues.

**Supplementary Table 20 The shared TWAS genes between migraine with aura and pulse pressure (PP)**

| ID           | CHR | Migraine with aura |               |                       |                                | PP                                   |               |        |                                |
|--------------|-----|--------------------|---------------|-----------------------|--------------------------------|--------------------------------------|---------------|--------|--------------------------------|
|              |     | Tissue             | BEST.GWAS .ID | TWAS.Z                | <i>P</i> <sub>Bonferroni</sub> | Tissue                               | BEST.GWAS .ID | TWAS.Z | <i>P</i> <sub>Bonferroni</sub> |
| RP11-624M8.1 | 6   | Brain_Amygdala     | rs1832937     | -4.22                 | 0.04                           | Lung                                 | rs4897160     | -5.43  | 4.28E-04                       |
|              |     |                    |               |                       |                                | Brain_Hippocampus                    | rs4897160     | -4.87  | 2.49E-03                       |
| UFL1         | 6   | Brain_Cerebellum   | rs13208321    | 4.46                  | 0.05                           | Pancreas                             | rs2983896     | 8.42   | 1.82E-13                       |
|              |     |                    |               |                       |                                | Spleen                               | rs2983896     | 8.28   | 5.29E-13                       |
|              |     |                    |               |                       |                                | Nerve_Tibial                         | rs2983896     | 8.28   | 1.15E-12                       |
|              |     |                    |               |                       |                                | Whole_Blood                          | rs2983896     | 7.84   | 2.71E-11                       |
|              |     |                    |               |                       |                                | Stomach                              | rs2983896     | 6.99   | 1.20E-08                       |
|              |     |                    |               |                       |                                | Artery_Tibial                        | rs2983896     | 6.69   | 1.87E-07                       |
|              |     |                    |               |                       |                                | Adipose_Subcutaneous                 | rs2983896     | 6.56   | 4.30E-07                       |
|              |     |                    |               |                       |                                | Brain_Cerebellum                     | rs2983896     | 6.03   | 9.43E-06                       |
| LRP1         | 12  | Artery_Tibial      | rs11172113    | 4.87                  | 0.01                           | Skin_Sun_Exposed_Lower_leg           | rs11172113    | -5.75  | 7.71E-05                       |
|              |     |                    |               |                       |                                | Artery_Tibial                        | rs11172113    | -5.54  | 2.44E-04                       |
| NMRAL1       | 16  | Adrenal_Gland      | rs2304634     | 4.42                  | 0.04                           | Brain_Anterior_cingulate_cortex_BA24 | rs4785955     | 5.52   | 8.94E-05                       |
|              |     | Muscle_Skeletal    | rs2304634     | 4.58                  | 0.03                           | Skin_Sun_Exposed_Lower_leg           | rs4785955     | 5.69   | 1.08E-04                       |
|              |     | Prostate           | rs2304634     | 4.42                  | 0.03                           | Esophagus_Gastroesophageal_Junction  | rs4785955     | 5.56   | 1.31E-04                       |
|              |     | Thyroid            | rs2304634     | 4.77                  | 0.02                           | Brain_Putamen_basal_ganglia          | rs4785955     | 5.27   | 3.84E-04                       |
|              |     |                    |               |                       |                                | Brain_Cortex                         | rs4785955     | 5.22   | 7.02E-04                       |
|              |     |                    |               |                       |                                | Lung                                 | rs4785955     | 5.27   | 1.06E-03                       |
|              |     |                    |               |                       |                                | Ovary                                | rs4785955     | 5.04   | 1.27E-03                       |
|              |     |                    |               |                       |                                | Cells_Transformed_fibroblasts        | rs4785955     | 5.21   | 1.40E-03                       |
|              |     |                    |               |                       |                                | Heart_Left_Ventricle                 | rs4785955     | 5.06   | 2.06E-03                       |
|              |     |                    |               |                       |                                | Stomach                              | rs4785955     | 5.04   | 2.08E-03                       |
|              |     |                    |               |                       |                                | Liver                                | rs4785955     | 4.95   | 2.15E-03                       |
|              |     |                    |               |                       |                                | Pancreas                             | rs4785955     | 5.05   | 2.18E-03                       |
|              |     |                    |               |                       |                                | Esophagus_Muscularis                 | rs4785955     | 5.13   | 2.23E-03                       |
|              |     |                    |               | Breast_Mammary_Tissue | rs4785955                      | 5.03                                 | 2.37E-03      |        |                                |

|       |    |               |           |       |                                           |                                           |           |          |          |
|-------|----|---------------|-----------|-------|-------------------------------------------|-------------------------------------------|-----------|----------|----------|
|       |    |               |           |       | Esophagus_Mucosa                          | rs4785955                                 | 5.11      | 2.53E-03 |          |
|       |    |               |           |       | Pituitary                                 | rs4785955                                 | 4.97      | 2.85E-03 |          |
|       |    |               |           |       | Colon_Sigmoid                             | rs4785955                                 | 4.99      | 2.94E-03 |          |
|       |    |               |           |       | Nerve_Tibial                              | rs4785955                                 | 5.12      | 2.94E-03 |          |
|       |    |               |           |       | Brain_Cerebellar_Hemisphere               | rs4785955                                 | 4.95      | 3.14E-03 |          |
|       |    |               |           |       | Whole_Blood                               | rs4785955                                 | 5.00      | 3.41E-03 |          |
|       |    |               |           |       | Artery_Tibial                             | rs4785955                                 | 5.02      | 4.08E-03 |          |
|       |    |               |           |       | Brain_Hippocampus                         | rs4785955                                 | 4.65      | 0.01     |          |
|       |    |               |           |       | Brain_Cerebellum                          | rs4785955                                 | 4.74      | 0.01     |          |
|       |    |               |           |       | Heart_Atrial_Appendage                    | rs4785955                                 | 4.73      | 0.01     |          |
|       |    |               |           |       | Adipose_Visceral_Omentum                  | rs4785955                                 | 4.69      | 0.02     |          |
|       |    |               |           |       | Skin_Not_Sun_Exposed_Suprapubic           | rs4785955                                 | 4.72      | 0.02     |          |
|       |    |               |           |       | Brain_Nucleus_accumbens_basal_gangli<br>a | rs4785955                                 | 4.50      | 0.02     |          |
|       |    | Artery_Tibial | rs2304634 | 4.88  | 0.01                                      | Spleen                                    | rs4785955 | 7.49     | 2.94E-10 |
|       |    |               |           |       |                                           | Brain_Cerebellum                          | rs4785955 | 6.11     | 5.69E-06 |
|       |    |               |           |       |                                           | Adipose_Visceral_Omentum                  | rs4785955 | 5.94     | 1.75E-05 |
|       |    |               |           |       |                                           | Thyroid                                   | rs4785955 | 5.67     | 1.37E-04 |
| HMOX2 | 16 |               |           |       |                                           | Brain_Nucleus_accumbens_basal_gangli<br>a | rs4785955 | -5.10    | 1.06E-03 |
|       |    |               |           |       |                                           | Breast_Mammary_Tissue                     | rs4785955 | 4.90     | 4.71E-03 |
|       |    |               |           |       |                                           | Brain_Caudate_basal_ganglia               | rs4785955 | -4.79    | 0.01     |
|       |    |               |           |       |                                           | Lung                                      | rs4785955 | 4.83     | 0.01     |
|       |    |               |           |       |                                           | Nerve_Tibial                              | rs4785955 | 4.72     | 0.02     |
| PAM16 | 16 | Whole_Blood   | rs2304634 | -4.47 | 0.05                                      | Stomach                                   | rs4785955 | -5.18    | 9.88E-04 |

Abbreviations: CHR: chromosome; PP: pulse pressure.

All these loci were TWAS significant ( $P_{\text{Bonferroni}} < 0.05$ ) for both migraine and blood pressure in at least one GTEx tissues.

**Supplementary Table 21 The shared TWAS genes between migraine without aura and diastolic blood pressure (DBP)**

| ID            | CHR | Migraine without aura          |              |        |                  | DBP                                   |              |        |                  |
|---------------|-----|--------------------------------|--------------|--------|------------------|---------------------------------------|--------------|--------|------------------|
|               |     | Tissue                         | BEST.GWAS.ID | TWAS.Z | $P_{Bonferroni}$ | Tissue                                | BEST.GWAS.ID | TWAS.Z | $P_{Bonferroni}$ |
| TSPAN2        | 1   | Artery_Aorta                   | rs2078371    | 5.66   | 9.45E-05         | Minor_Salivary_Gland                  | rs11466111   | -4.19  | 0.05             |
|               |     | Esophagus_Mucosa               | rs1265646    | -4.87  | 0.01             | Artery_Coronary                       | rs4141663    | -9.09  | 3.15E-16         |
|               |     | Nerve_Tibial                   | rs1265646    | 4.80   | 0.02             | Artery_Tibial                         | rs4141663    | -8.46  | 2.14E-13         |
|               |     |                                |              |        |                  | Colon_Sigmoid                         | rs4141663    | -8.35  | 3.31E-13         |
|               |     |                                |              |        |                  | Esophagus_Muscularis                  | rs4141663    | -8.27  | 9.94E-13         |
| ITGB5         | 3   |                                |              |        |                  | Nerve_Tibial                          | rs4141663    | -8.27  | 1.26E-12         |
|               |     |                                |              |        |                  | Esophagus_Gastroesophageal_Junction   | rs4141663    | -8.20  | 1.15E-12         |
|               |     |                                |              |        |                  | Artery_Aorta                          | rs4141663    | -8.09  | 3.77E-12         |
|               |     |                                |              |        |                  | Esophagus_Mucosa                      | rs4141663    | 7.77   | 6.21E-11         |
|               |     |                                |              |        |                  | Brain_Hypothalamus                    | rs4141663    | -6.57  | 1.14E-07         |
|               |     |                                |              |        |                  | Muscle_Skeletal                       | rs4141663    | -4.52  | 0.05             |
|               |     | Small_Intestine_Terminal_Ileum | rs228614     | 4.39   | 0.03             | Artery_Aorta                          | rs13107325   | -8.82  | 6.98E-15         |
|               |     |                                |              |        |                  | Breast_Mammary_Tissue                 | rs13107325   | -8.40  | 2.31E-13         |
|               |     |                                |              |        |                  | Cells_Transformed_fibroblasts         | rs13107325   | -8.39  | 3.49E-13         |
|               |     |                                |              |        |                  | Adrenal_Gland                         | rs13107325   | -7.80  | 2.67E-11         |
| MANBA         | 4   |                                |              |        |                  | Brain_Cerebellar_Hemisphere           | rs13107325   | 7.15   | 3.78E-09         |
|               |     |                                |              |        |                  | Spleen                                | rs13107325   | 6.55   | 2.52E-07         |
|               |     |                                |              |        |                  | Brain_Hippocampus                     | rs13107325   | 6.18   | 1.41E-06         |
|               |     |                                |              |        |                  | Small_Intestine_Terminal_Ileum        | rs13107325   | 5.81   | 1.76E-05         |
|               |     |                                |              |        |                  | Testis                                | rs13107325   | 5.23   | 1.56E-03         |
|               |     | Brain_Putamen_basal_ganglia    | rs17531978   | 4.32   | 0.04             | Brain_Cerebellum                      | rs198846     | -10.43 | 1.08E-21         |
|               |     |                                |              |        |                  | Brain_Cerebellar_Hemisphere           | rs198846     | -8.54  | 5.84E-14         |
|               |     |                                |              |        |                  | Brain_Spinal_cord_cervical_c-1        | rs198846     | -7.42  | 2.25E-10         |
| U91328.1<br>9 | 6   |                                |              |        |                  | Brain_Nucleus_accumbens_basal_ganglia | rs198846     | -6.71  | 6.25E-08         |
|               |     |                                |              |        |                  | Colon_Sigmoid                         | rs198846     | -5.11  | 1.57E-03         |
|               |     |                                |              |        |                  | Brain_Caudate_basal_ganglia           | rs198846     | -4.94  | 2.75E-03         |
|               |     |                                |              |        |                  | Brain_Hippocampus                     | rs198846     | -4.75  | 4.53E-03         |
|               |     |                                |              |        |                  | Brain_Putamen_basal_ganglia           | rs198846     | -4.55  | 0.01             |
| UFL1          | 6   | Adipose_Subcutaneous           | rs2273621    | 5.89   | 3.05E-05         | Spleen                                | rs11756315   | 6.17   | 2.97E-06         |

|       |    |                   |            |      |          |                      |            |       |          |
|-------|----|-------------------|------------|------|----------|----------------------|------------|-------|----------|
|       |    | Artery_Tibial     | rs2273621  | 6.13 | 7.34E-06 | Nerve_Tibial         | rs11756315 | 6.09  | 1.09E-05 |
|       |    | Brain_Cerebellum  | rs2273621  | 6.62 | 2.06E-07 | Pancreas             | rs11756315 | 5.74  | 4.64E-05 |
|       |    | Nerve_Tibial      | rs2273621  | 5.81 | 5.92E-05 | Whole_Blood          | rs11756315 | 5.68  | 8.01E-05 |
|       |    | Pancreas          | rs2273621  | 6.67 | 1.33E-07 | Stomach              | rs11756315 | 5.55  | 1.24E-04 |
|       |    | Spleen            | rs2273621  | 5.11 | 1.42E-03 | Artery_Tibial        | rs11756315 | 5.52  | 2.69E-04 |
|       |    | Stomach           | rs2273621  | 5.19 | 9.44E-04 | Adipose_Subcutaneous | rs11756315 | 5.47  | 3.59E-04 |
|       |    | Vagina            | rs2273621  | 5.88 | 7.83E-06 |                      |            |       |          |
|       |    | Whole_Blood       | rs2273621  | 4.86 | 0.01     |                      |            |       |          |
| HVCN1 | 12 | Brain_Hippocampus | rs17619763 | 5.36 | 1.87E-04 | Brain_Hippocampus    | rs11065822 | -9.04 | 3.61E-16 |
|       |    |                   |            |      |          | Whole_Blood          | rs11065822 | 6.39  | 9.77E-07 |

Abbreviations: CHR: chromosome; DBP: diastolic blood pressure.

All these loci were TWAS significant ( $P_{\text{Bonferroni}} < 0.05$ ) for both migraine and blood pressure in at least one GTEx tissues.



**Supplementary Table 22 The shared TWAS genes between migraine without aura and systolic blood pressure (SBP)**

| ID          | CHR | Migraine without aura          |              |        |                  | SBP                                 |              |        |                  |
|-------------|-----|--------------------------------|--------------|--------|------------------|-------------------------------------|--------------|--------|------------------|
|             |     | Tissue                         | BEST.GWAS.ID | TWAS.Z | $P_{Bonferroni}$ | Tissue                              | BEST.GWAS.ID | TWAS.Z | $P_{Bonferroni}$ |
| ITGB5       | 3   | Esophagus_Mucosa               | rs1265646    | -4.87  | 0.01             | Artery_Coronary                     | rs4141663    | -9.27  | 5.71E-17         |
|             |     | Nerve_Tibial                   | rs1265646    | 4.80   | 0.02             | Artery_Tibial                       | rs4141663    | -8.88  | 5.18E-15         |
|             |     |                                |              |        |                  | Esophagus_Muscularis                | rs4141663    | -8.64  | 4.31E-14         |
|             |     |                                |              |        |                  | Nerve_Tibial                        | rs4141663    | -8.65  | 4.85E-14         |
|             |     |                                |              |        |                  | Artery_Aorta                        | rs4141663    | -8.56  | 7.23E-14         |
|             |     |                                |              |        |                  | Esophagus_Gastroesophageal_Junction | rs4141663    | -8.52  | 7.42E-14         |
|             |     |                                |              |        |                  | Colon_Sigmoid                       | rs4141663    | -8.25  | 7.56E-13         |
|             |     |                                |              |        |                  | Esophagus_Mucosa                    | rs4141663    | 7.77   | 6.42E-11         |
|             |     |                                |              |        |                  | Brain_Hypothalamus                  | rs4141663    | -7.13  | 2.19E-09         |
| FHL5        | 6   | Artery_Tibial                  | rs2273621    | -5.05  | 3.55E-03         | Artery_Tibial                       | rs2983896    | -6.00  | 1.64E-05         |
| PHACTR1     | 6   | Artery_Aorta                   | rs9349379    | 6.29   | 2.03E-06         | Artery_Aorta                        | rs9349379    | 8.50   | 1.24E-13         |
|             |     | Artery_Tibial                  | rs9349379    | 5.77   | 6.34E-05         | Artery_Tibial                       | rs9349379    | 7.31   | 2.23E-09         |
|             |     | Brain_Spinal_cord_cervical_c-1 | rs9349379    | 4.62   | 0.01             |                                     |              |        |                  |
| RP1-257A7.5 | 6   | Artery_Aorta                   | rs9349379    | 6.01   | 1.19E-05         | Artery_Tibial                       | rs9349379    | 8.60   | 6.28E-14         |
|             |     | Artery_Coronary                | rs9349379    | 6.20   | 1.84E-06         | Artery_Aorta                        | rs9349379    | 8.54   | 8.50E-14         |
|             |     | Artery_Tibial                  | rs9349379    | 6.22   | 3.90E-06         | Artery_Coronary                     | rs9349379    | 7.12   | 3.36E-09         |
| U91328.19   | 6   | Brain_Putamen_basal_ganglia    | rs17531978   | 4.32   | 0.04             | Brain_Cerebellum                    | rs198846     | -6.40  | 9.15E-07         |
|             |     |                                |              |        |                  | Brain_Cerebellar_Hemisphere         | rs198846     | -5.11  | 1.40E-03         |
| UFL1        | 6   | Adipose_Subcutaneous           | rs2273621    | 5.89   | 3.05E-05         | Spleen                              | rs2983896    | 9.17   | 1.99E-16         |
|             |     | Artery_Tibial                  | rs2273621    | 6.13   | 7.34E-06         | Nerve_Tibial                        | rs2983896    | 9.15   | 5.60E-16         |
|             |     | Brain_Cerebellum               | rs2273621    | 6.62   | 2.06E-07         | Pancreas                            | rs2983896    | 9.00   | 1.16E-15         |
|             |     | Nerve_Tibial                   | rs2273621    | 5.81   | 5.92E-05         | Whole_Blood                         | rs2983896    | 8.51   | 1.05E-13         |
|             |     | Pancreas                       | rs2273621    | 6.67   | 1.33E-07         | Stomach                             | rs2983896    | 8.10   | 2.43E-12         |
|             |     | Spleen                         | rs2273621    | 5.11   | 1.42E-03         | Artery_Tibial                       | rs2983896    | 7.69   | 1.16E-10         |
|             |     | Stomach                        | rs2273621    | 5.19   | 9.44E-04         | Adipose_Subcutaneous                | rs2983896    | 7.57   | 2.98E-10         |
|             |     | Vagina                         | rs2273621    | 5.88   | 7.83E-06         | Brain_Cerebellum                    | rs2983896    | 6.46   | 5.92E-07         |
|             |     | Whole_Blood                    | rs2273621    | 4.86   | 0.01             | Vagina                              | rs2983896    | 4.68   | 0.01             |
| HVCN1       | 12  | Brain_Hippocampus              | rs17619763   | 5.36   | 1.87E-04         | Brain_Hippocampus                   | rs11065822   | -4.93  | 1.86E-03         |
|             |     |                                |              |        |                  | Whole_Blood                         | rs11065822   | 4.94   | 4.59E-03         |

Abbreviations: CHR: chromosome; SBP: systolic blood pressure.

All these loci were TWAS significant ( $P_{\text{Bonferroni}} < 0.05$ ) for both migraine and blood pressure in at least one GTEx tissues.

**Supplementary Table 23 The shared TWAS genes between migraine without aura and pulse pressure (PP)**

| ID          | CHR | Migraine without aura          |              |                                |                  | PP                                  |              |                  |                  |
|-------------|-----|--------------------------------|--------------|--------------------------------|------------------|-------------------------------------|--------------|------------------|------------------|
|             |     | Tissue                         | BEST.GWAS.ID | TWAS.Z                         | $P_{Bonferroni}$ | Tissue                              | BEST.GWAS.ID | TWAS.Z           | $P_{Bonferroni}$ |
| ITGB5       | 3   | Esophagus_Mucosa               | rs1265646    | -4.87                          | 0.01             | Artery_Coronary                     | rs4141663    | -6.17            | 2.16E-06         |
|             |     | Nerve_Tibial                   | rs1265646    | 4.80                           | 0.02             | Artery_Tibial                       | rs4141663    | -6.20            | 4.62E-06         |
|             |     |                                |              |                                |                  | Artery_Aorta                        | rs4141663    | -5.97            | 1.50E-05         |
|             |     |                                |              |                                |                  | Esophagus_Muscularis                | rs4141663    | -5.93            | 2.30E-05         |
|             |     |                                |              |                                |                  | Esophagus_Gastroesophageal_Junction | rs4141663    | -5.78            | 3.61E-05         |
|             |     |                                |              |                                |                  | Nerve_Tibial                        | rs4141663    | -5.82            | 5.61E-05         |
|             |     |                                |              |                                |                  | Colon_Sigmoid                       | rs4141663    | -5.38            | 3.53E-04         |
|             |     |                                |              |                                |                  | Brain_Hypothalamus                  | rs4141663    | -5.05            | 1.00E-03         |
|             |     |                                |              |                                |                  | Esophagus_Mucosa                    | rs4141663    | 4.92             | 0.01             |
|             |     |                                |              | Small_Intestine_Terminal_Ileum | rs228614         | 4.39                                | 0.03         | Brain_Cerebellum | rs13107325       |
| MANBA       | 4   |                                |              |                                |                  | Artery_Aorta                        | rs13107325   | 5.50             | 2.38E-04         |
|             |     |                                |              |                                |                  | Breast_Mammary_Tissue               | rs13107325   | 5.26             | 7.08E-04         |
|             |     |                                |              |                                |                  | Adrenal_Gland                       | rs13107325   | 5.03             | 2.13E-03         |
|             |     |                                |              |                                |                  | Spleen                              | rs13107325   | -4.96            | 3.05E-03         |
|             |     |                                |              |                                |                  | Brain_Cerebellar_Hemisphere         | rs13107325   | -4.85            | 0.01             |
|             |     |                                |              |                                |                  | Cells_Transformed_fibroblasts       | rs13107325   | 4.89             | 0.01             |
|             |     |                                |              |                                |                  |                                     |              |                  |                  |
| FHL5        | 6   | Artery_Tibial                  | rs2273621    | -5.05                          | 3.55E-03         | Artery_Tibial                       | rs2983896    | -6.12            | 7.64E-06         |
| PHACTR1     | 6   | Artery_Aorta                   | rs9349379    | 6.29                           | 2.03E-06         | Artery_Aorta                        | rs9349379    | 12.39            | 1.83E-31         |
|             |     | Artery_Tibial                  | rs9349379    | 5.77                           | 6.34E-05         | Artery_Tibial                       | rs9349379    | 11.13            | 6.97E-25         |
|             |     | Brain_Spinal_cord_cervical_c-1 | rs9349379    | 4.62                           | 0.01             | Breast_Mammary_Tissue               | rs9349379    | 5.46             | 2.40E-04         |
|             |     |                                |              |                                |                  | Cells_Transformed_fibroblasts       | rs9349379    | 5.19             | 1.53E-03         |
| RP1-257A7.5 | 6   | Artery_Aorta                   | rs9349379    | 6.01                           | 1.19E-05         | Artery_Aorta                        | rs9349379    | 12.64            | 7.74E-33         |
|             |     | Artery_Coronary                | rs9349379    | 6.20                           | 1.84E-06         | Artery_Tibial                       | rs9349379    | 12.65            | 9.06E-33         |
|             |     | Artery_Tibial                  | rs9349379    | 6.22                           | 3.90E-06         | Artery_Coronary                     | rs9349379    | 10.83            | 8.12E-24         |
| U91328.19   | 6   | Brain_Putamen_basal_ganglia    | rs17531978   | 4.32                           | 0.04             | Whole_Blood                         | rs13161      | 6.27             | 2.12E-06         |
|             |     |                                |              |                                |                  | Uterus                              | rs13161      | 4.33             | 0.03             |
| UFL1        | 6   | Adipose_Subcutaneous           | rs2273621    | 5.89                           | 3.05E-05         | Pancreas                            | rs2983896    | 8.42             | 1.82E-13         |
|             |     | Artery_Tibial                  | rs2273621    | 6.13                           | 7.34E-06         | Spleen                              | rs2983896    | 8.28             | 5.29E-13         |
|             |     | Brain_Cerebellum               | rs2273621    | 6.62                           | 2.06E-07         | Nerve_Tibial                        | rs2983896    | 8.28             | 1.15E-12         |
|             |     | Nerve_Tibial                   | rs2273621    | 5.81                           | 5.92E-05         | Whole_Blood                         | rs2983896    | 7.84             | 2.71E-11         |

|          |    |                        |            |       |          |                             |            |       |          |
|----------|----|------------------------|------------|-------|----------|-----------------------------|------------|-------|----------|
|          |    | Pancreas               | rs2273621  | 6.67  | 1.33E-07 | Stomach                     | rs2983896  | 6.99  | 1.20E-08 |
|          |    | Spleen                 | rs2273621  | 5.11  | 1.42E-03 | Artery_Tibial               | rs2983896  | 6.69  | 1.87E-07 |
|          |    | Stomach                | rs2273621  | 5.19  | 9.44E-04 | Adipose_Subcutaneous        | rs2983896  | 6.56  | 4.30E-07 |
|          |    | Vagina                 | rs2273621  | 5.88  | 7.83E-06 | Brain_Cerebellum            | rs2983896  | 6.03  | 9.43E-06 |
|          |    | Whole_Blood            | rs2273621  | 4.86  | 0.01     | Vagina                      | rs2983896  | 4.40  | 0.02     |
| HBCBP    | 12 | Adrenal_Gland          | rs11172113 | 4.85  | 0.01     | Adrenal_Gland               | rs11172113 | -7.59 | 1.44E-10 |
| LRP1     | 12 | Artery_Tibial          | rs11172113 | 8.13  | 3.45E-12 | Skin_Sun_Exposed_Lower_leg  | rs11172113 | -5.75 | 7.71E-05 |
|          |    |                        |            |       |          | Artery_Tibial               | rs11172113 | -5.54 | 2.44E-04 |
| TMEM194A | 12 | Heart_Atrial_Appendage | rs11172113 | -4.93 | 4.57E-03 | Heart_Atrial_Appendage      | rs11172113 | 5.10  | 1.87E-03 |
| ATP5SL   | 19 | Brain_Cortex           | rs3810174  | 4.48  | 0.03     | Brain_Caudate_basal_ganglia | rs4803457  | -4.71 | 0.01     |
|          |    | Lung                   | rs3810174  | 4.62  | 0.03     | Lung                        | rs4803457  | -5.15 | 2.03E-03 |
|          |    |                        |            |       |          | Nerve_Tibial                | rs4803457  | -5.09 | 3.48E-03 |
| C19orf69 | 19 |                        |            |       |          | Esophagus_Mucosa            | rs4803457  | -4.81 | 0.01     |
|          |    |                        |            |       |          | Muscle_Skeletal             | rs4803457  | -4.53 | 0.04     |
|          |    |                        |            |       |          | Adipose_Subcutaneous        | rs4803457  | -4.53 | 0.05     |

Abbreviations: CHR: chromosome; PP: pulse pressure.

All these loci were TWAS significant ( $P_{\text{Bonferroni}} < 0.05$ ) for both migraine and blood pressure in at least one GTEx tissues.

**Supplementary Table 24** Sensitivity analysis for mendelian randomization using IVW, weighted median, simple median, and MR-egger

| Method   | Exposure        | Outcome            | Beta          | SE           | P      |      |        |
|----------|-----------------|--------------------|---------------|--------------|--------|------|--------|
| IVW      | $\beta_{DBP}$   | $\beta_{Migraine}$ | 0.16          | 0.02         | <0.001 |      |        |
|          | $\beta_{SBP}$   |                    | 0.05          | 0.01         | <0.001 |      |        |
|          | $\beta_{PP}$    |                    | -0.05         | 0.03         | 0.04   |      |        |
|          | Weighted Median | $\beta_{DBP}$      | $\beta_{MA}$  | 0.14         | 0.05   | 0.01 |        |
|          |                 | $\beta_{SBP}$      |               | 0.07         | 0.03   | 0.03 |        |
|          |                 | $\beta_{PP}$       |               | -0.06        | 0.05   | 0.24 |        |
|          |                 | Simple Median      | $\beta_{DBP}$ | $\beta_{MO}$ | 0.30   | 0.05 | <0.001 |
|          |                 |                    | $\beta_{SBP}$ |              | 0.07   | 0.03 | 0.03   |
|          |                 |                    | $\beta_{PP}$  |              | -0.18  | 0.05 | 0.001  |
| MR-Egger | $\beta_{DBP}$   | $\beta_{Migraine}$ | 0.15          | 0.03         | <0.001 |      |        |
|          | $\beta_{SBP}$   |                    | 0.03          | 0.02         | 0.07   |      |        |
|          | $\beta_{PP}$    |                    | -0.09         | 0.03         | <0.001 |      |        |
|          | Weighted Median | $\beta_{DBP}$      | $\beta_{MA}$  | 0.06         | 0.08   | 0.45 |        |
|          |                 | $\beta_{SBP}$      |               | 0.01         | 0.05   | 0.81 |        |
|          |                 | $\beta_{PP}$       |               | -0.11        | 0.08   | 0.16 |        |
|          |                 | Simple Median      | $\beta_{DBP}$ | $\beta_{MO}$ | 0.30   | 0.07 | <0.001 |
|          |                 |                    | $\beta_{SBP}$ |              | 0.08   | 0.04 | 0.06   |
|          |                 |                    | $\beta_{PP}$  |              | -0.15  | 0.07 | 0.04   |
| MR-Egger | $\beta_{DBP}$   | $\beta_{Migraine}$ | 0.18          | 0.03         | <0.001 |      |        |
|          | $\beta_{SBP}$   |                    | 0.03          | 0.02         | 0.04   |      |        |
|          | $\beta_{PP}$    |                    | -0.07         | 0.03         | 0.01   |      |        |
|          | Simple Median   | $\beta_{DBP}$      | $\beta_{MA}$  | 0.10         | 0.08   | 0.19 |        |
|          |                 | $\beta_{SBP}$      |               | 0.02         | 0.05   | 0.71 |        |
|          |                 | $\beta_{PP}$       |               | -0.05        | 0.07   | 0.51 |        |
|          |                 | MR-Egger           | $\beta_{DBP}$ | $\beta_{MO}$ | 0.30   | 0.07 | <0.001 |
|          |                 |                    | $\beta_{SBP}$ |              | 0.08   | 0.04 | 0.06   |
|          |                 |                    | $\beta_{PP}$  |              | -0.09  | 0.07 | 0.18   |
| MR-Egger | $\beta_{DBP}$   | $\beta_{Migraine}$ | 0.14          | 0.06         | 0.02   |      |        |
|          | $\beta_{SBP}$   |                    | 0.06          | 0.04         | 0.11   |      |        |
|          | $\beta_{PP}$    |                    | -0.08         | 0.07         | 0.25   |      |        |
|          | Simple Median   | $\beta_{DBP}$      | $\beta_{MA}$  | 0.14         | 0.14   | 0.34 |        |
|          |                 | $\beta_{SBP}$      |               | 0.06         | 0.09   | 0.51 |        |
|          |                 | $\beta_{PP}$       |               | -0.19        | 0.14   | 0.18 |        |

|                      |                     |       |      |      |
|----------------------|---------------------|-------|------|------|
| $\beta_{\text{DBP}}$ |                     | 0.30  | 0.1  | 0.01 |
| $\beta_{\text{SBP}}$ | $\beta_{\text{MO}}$ | 0.10  | 0.08 | 0.16 |
| $\beta_{\text{PP}}$  |                     | -0.21 | 0.15 | 0.16 |

---

Abbreviations: SE: standard error; IVW: inverse-variance weighted; MR-Egger: Egger regression; DBP: diastolic blood pressure; SBP: systolic blood pressure; PP: pulse pressure; MA: migraine with aura; MO: migraine without aura.

All sensitivity analyses were conducted using the corresponding models implemented in R package “MendelianRandomization”.

**Supplementary Table 25 Mendelian randomization (MR) analysis for five instruments from antihypertensive medications genetic targets with migraine and MR power calculation**

| Exposure | Outcome     | SNP       | CHR | effect | MAF  | R2     | R2.TOTAL | MR.effect | P    | MR.POWER |
|----------|-------------|-----------|-----|--------|------|--------|----------|-----------|------|----------|
| DBP      |             | rs8077276 | 17  | -0.02  | 0.38 | 0.0001 | 0.0008   | 0.20      | 0.98 | 0.25     |
|          |             | rs2484294 | 10  | 0.03   | 0.27 | 0.0003 |          |           |      |          |
|          |             | rs1888693 | 10  | 0.02   | 0.34 | 0.0002 |          |           |      |          |
|          |             | rs3821843 | 3   | 0.02   | 0.32 | 0.0001 |          |           |      |          |
|          |             | rs2239046 | 12  | 0.01   | 0.32 | 0.0000 |          |           |      |          |
| SBP      | Anymigraine | rs8077276 | 17  | -0.02  | 0.38 | 0.0002 | 0.0011   | 0.08      | 0.89 | 0.1      |
|          |             | rs2484294 | 10  | 0.03   | 0.27 | 0.0004 |          |           |      |          |
|          |             | rs1888693 | 10  | 0.03   | 0.34 | 0.0003 |          |           |      |          |
|          |             | rs3821843 | 3   | 0.02   | 0.32 | 0.0002 |          |           |      |          |
|          |             | rs2239046 | 12  | 0.01   | 0.32 | 0.0001 |          |           |      |          |
| PP       |             | rs8077276 | 17  | -0.01  | 0.38 | 0.0000 | 0.0003   | -0.11     | 0.68 | 0.07     |
|          |             | rs2484294 | 10  | 0.01   | 0.27 | 0.0000 |          |           |      |          |
|          |             | rs1888693 | 10  | 0.01   | 0.34 | 0.0001 |          |           |      |          |
|          |             | rs3821843 | 3   | 0.01   | 0.32 | 0.0001 |          |           |      |          |
|          |             | rs2239046 | 12  | 0.01   | 0.32 | 0.0000 |          |           |      |          |

Abbreviations: SNP: single nucleotide polymorphisms; CHR: chromosome; MAF: minor allele frequency; R2: proportion of variance explained for the association between the corresponding SNP and the exposure variable; R2.TOTAL: proportion of variance explained for the association between all the five SNPs and the exposure variable; DBP: diastolic blood pressure; MR.POWER: estimated power in mendelian randomization; SBP: systolic blood pressure; PP: pulse pressure; MA: migraine with aura; MO: migraine without aura.

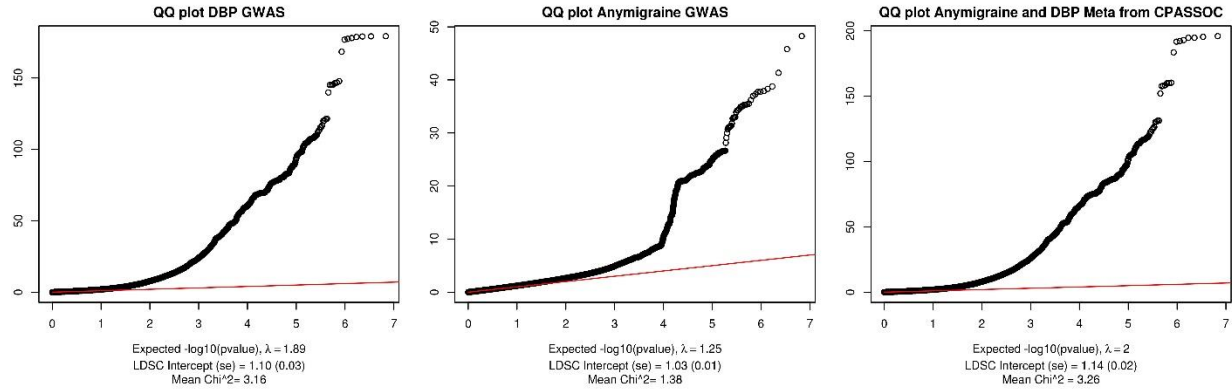

**Supplementary Figure 1** Quantile-quantile (QQ) plot for diastolic blood pressure (DBP), migraine, and cross-trait meta-analysis between DBP and migraine.

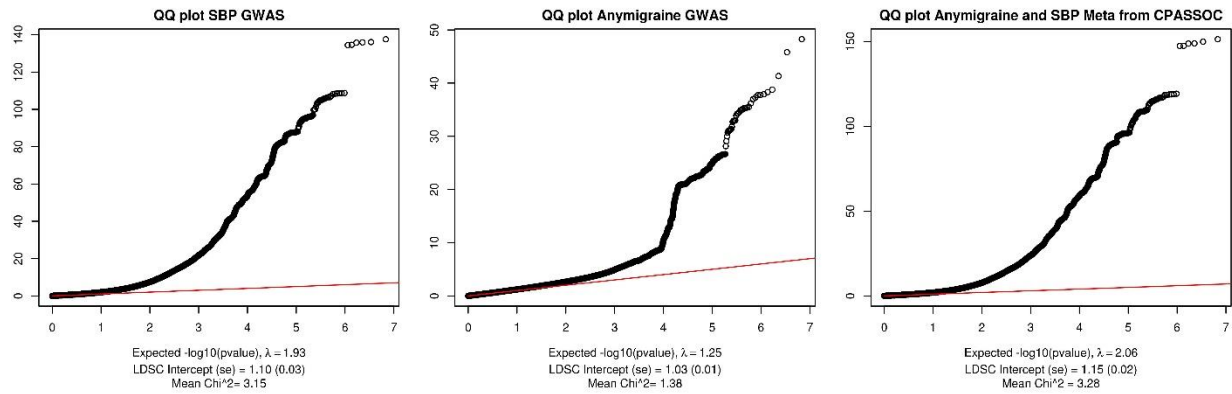

**Supplementary Figure 2** Quantile-quantile (QQ) plot for systolic blood pressure (SBP), migraine, and cross-trait meta-analysis between SBP and migraine.

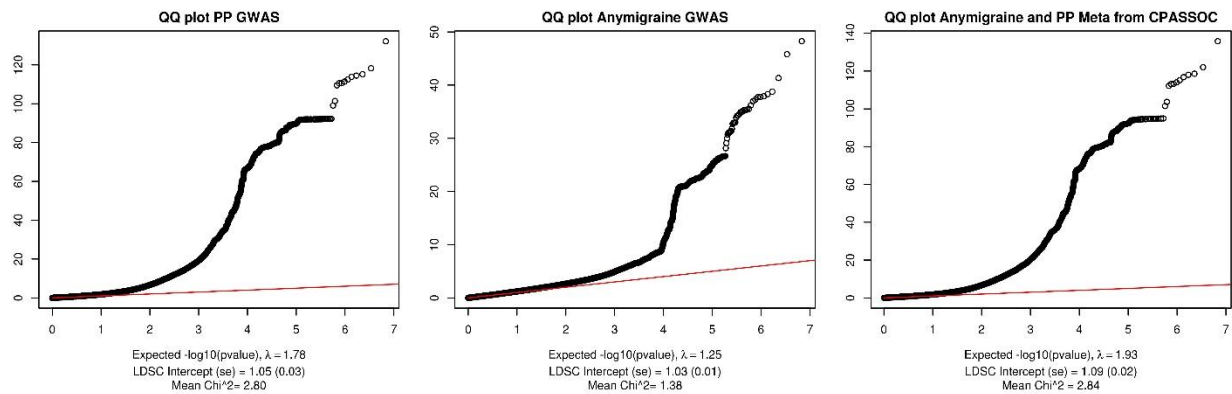

**Supplementary Figure 3** Quantile-quantile (QQ) plot for pulse pressure (PP), migraine, and cross-trait meta-analysis between SBP and migraine.



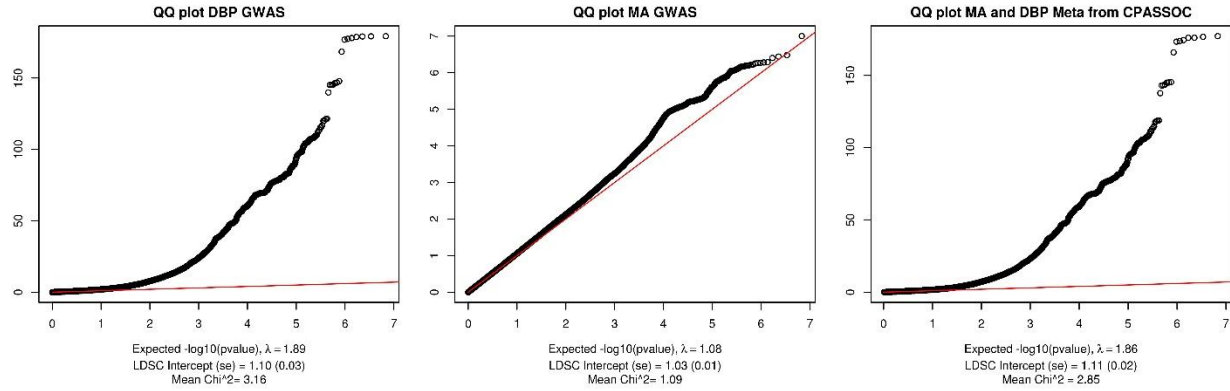

**Supplementary Figure 4** Quantile-quantile (QQ) plot for diastolic blood pressure (DBP), migraine with aura (MA), and cross-trait meta-analysis between DBP and MA.

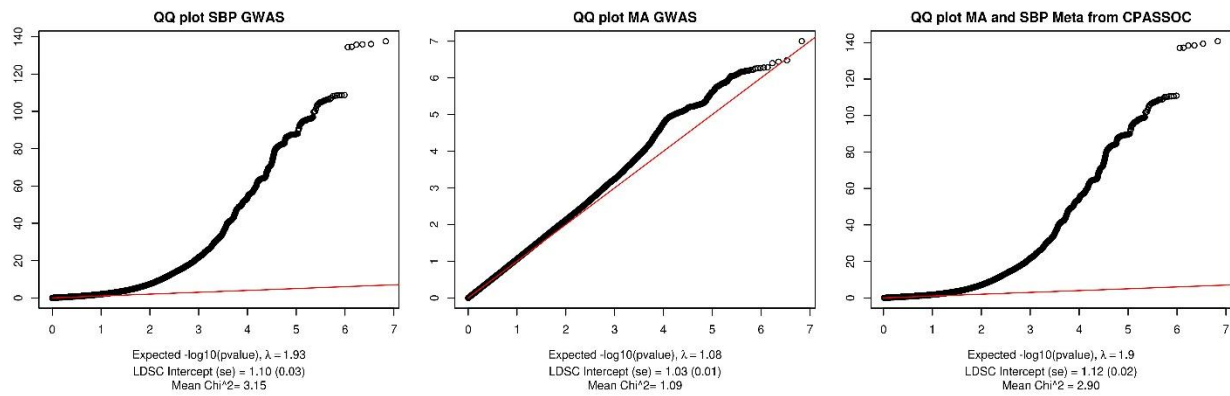

**Supplementary Figure 5** Quantile-quantile (QQ) plot for systolic blood pressure (SBP), migraine with aura (MA), and cross-trait meta-analysis between SBP and MA.

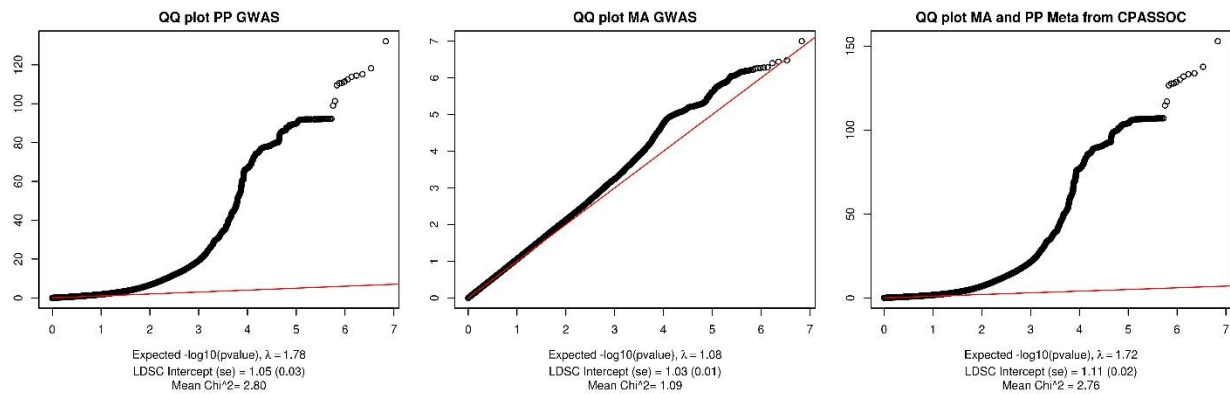

**Supplementary Figure 6** Quantile-quantile (QQ) plot for pulse pressure (PP), migraine with aura (MA), and cross-trait meta-analysis between PP and MA.

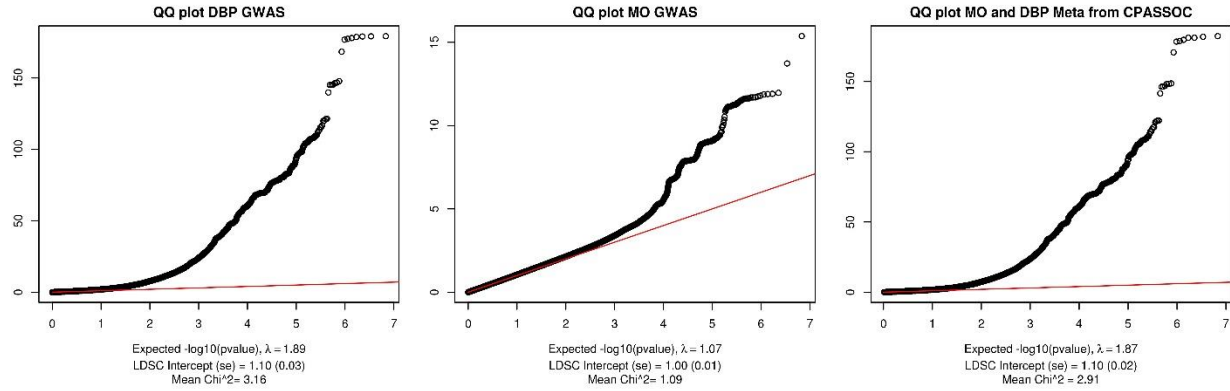

**Supplementary Figure 7** Quantile-quantile (QQ) plot for diastolic blood pressure (DBP), migraine without aura (MO), and cross-trait meta-analysis between DBP and MO.

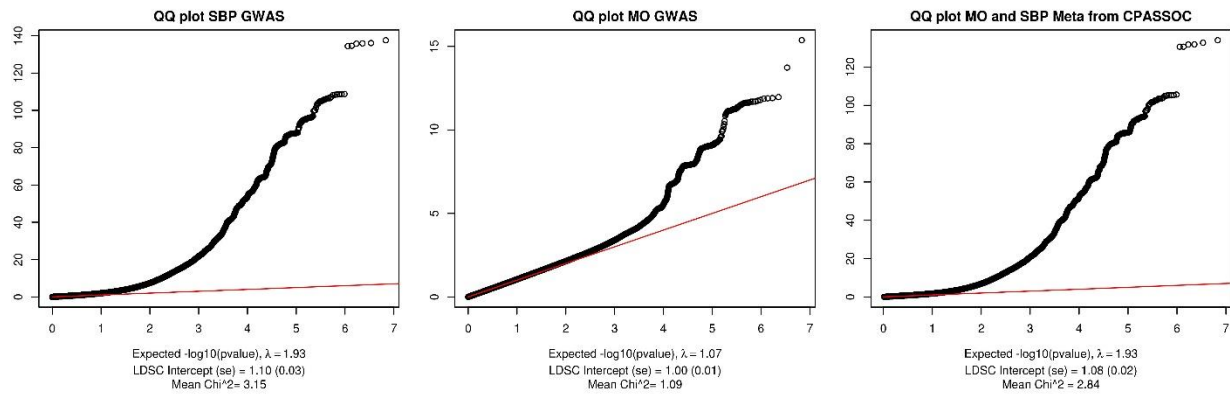

**Supplementary Figure 8** Quantile-quantile (QQ) plot for systolic blood pressure (SBP), migraine without aura (MO), and cross-trait meta-analysis between SBP and MO.

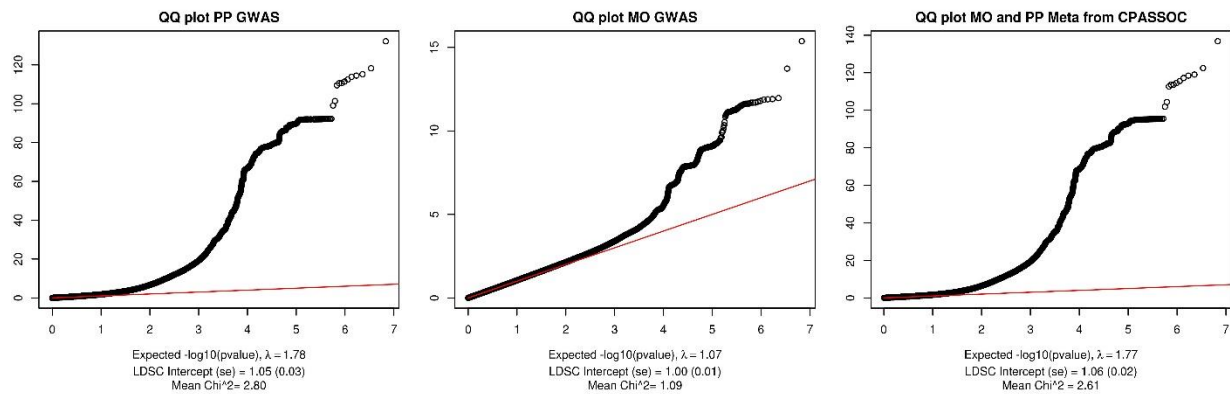

**Supplementary Figure 9** Quantile-quantile (QQ) plot for pulse pressure (PP), migraine without aura (MO), and cross-trait meta-analysis between PP and MO.

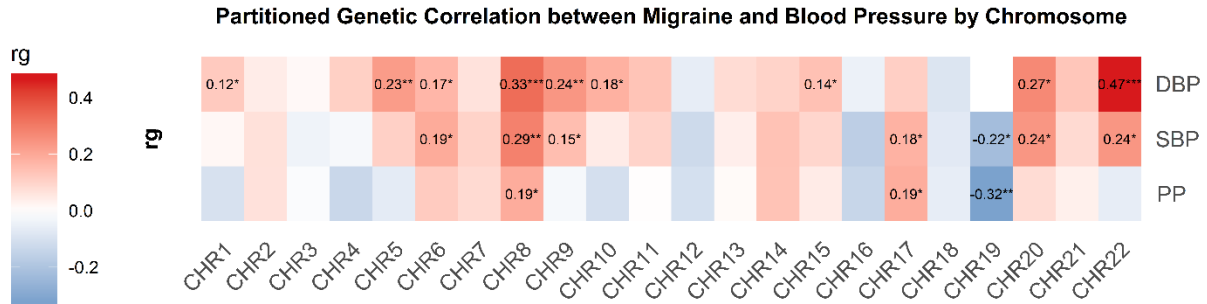

**Supplementary Figure 10 Partitioned genetic correlation between migraine and blood pressure by different chromosomes.** Colors represent the estimated annotation specific genetic correlation between migraine and BP traits (DBP, SBP, and PP) using GNOVA, red for positive genetic correlation and blue for negative genetic correlation at the corresponding annotation. The significant effects ( $P < 0.05$ ) are labeled with  $r_g$ . The nominally significant effects are labeled with “\*” ( $P < 0.05$ ), “\*\*” ( $P < 0.01$ ), and “\*\*\*” ( $P < 0.001$ ).

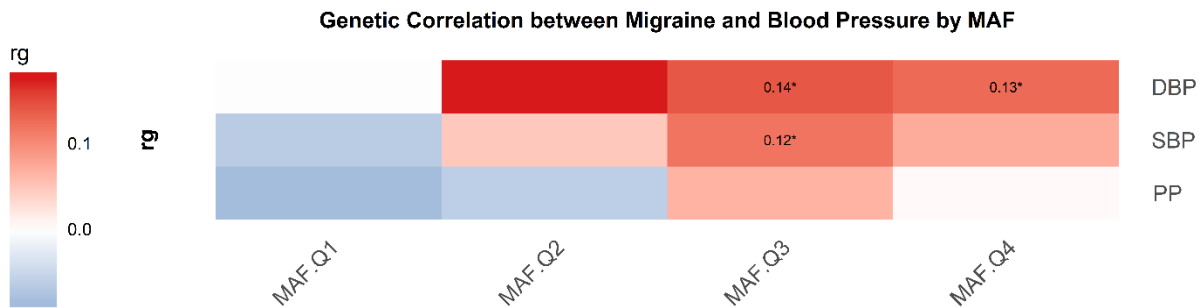

**Supplementary Figure 11 Partitioned genetic correlation between migraine and blood pressure by minor allele frequency (MAF) quartiles.** Colors represent the estimated annotation specific genetic correlation between migraine and BP traits (DBP, SBP, and PP) using GNOVA, red for positive genetic correlation and blue for negative genetic correlation at the corresponding annotation. The significant effects ( $P < 0.05$ ) are labeled with  $r_g$ . The nominally significant effects are labeled with “\*” ( $P < 0.05$ ), “\*\*” ( $P < 0.01$ ), and “\*\*\*” ( $P < 0.001$ ).

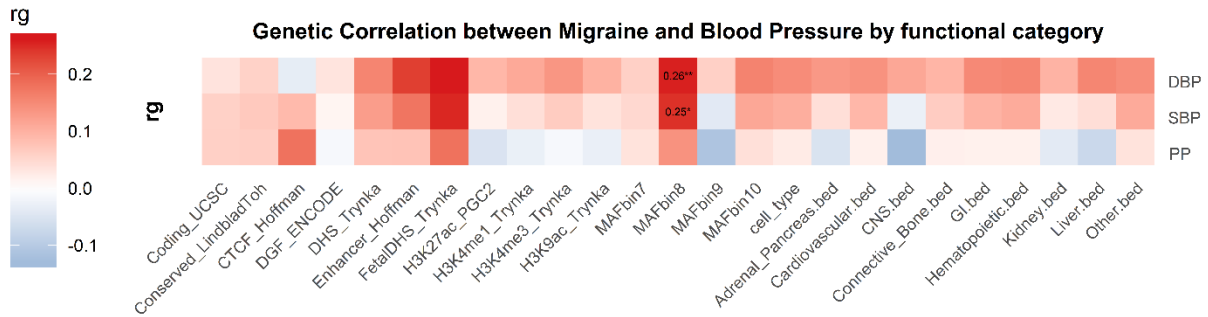

**Supplementary Figure 12 Partitioned genetic correlation between migraine and blood pressure by different functional categories.** Colors represent the estimated annotation specific genetic correlation between migraine and BP traits (DBP, SBP, and PP) using GNOVA, red for positive genetic correlation and blue for negative genetic correlation at the corresponding annotation. The significant effects ( $P < 0.05$ ) are labeled with  $r_g$ . The nominally significant effects are labeled with “\*” ( $P < 0.05$ ), “\*\*\*” ( $P < 0.01$ ), and “\*\*\*\*” ( $P < 0.001$ ).

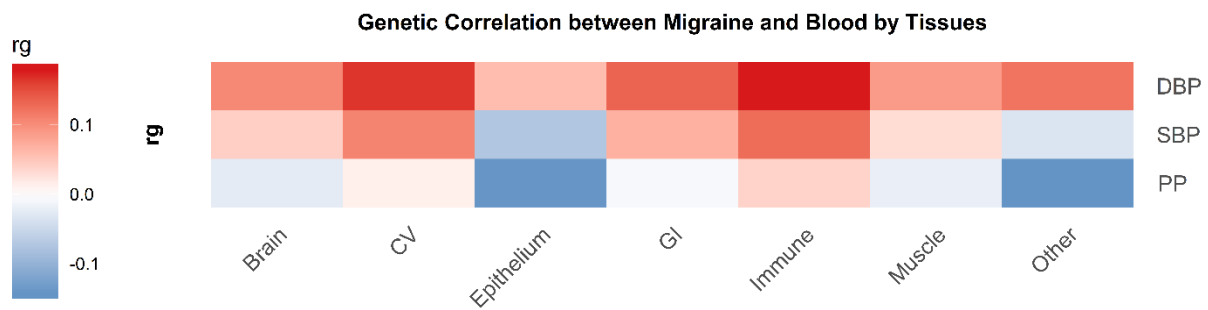

**Supplementary Figure 13 Partitioned genetic correlation between migraine and blood pressure by seven tissues based on GenoSkyline-Plus annotations.** Colors represent the estimated annotation specific genetic correlation between migraine and BP traits (DBP, SBP, and PP) using GNOVA, red for positive genetic correlation and blue for negative genetic correlation at the corresponding annotation. The significant effects ( $P < 0.05$ ) are labeled with  $r_g$ . The nominally significant effects are labeled with “\*” ( $P < 0.05$ ), “\*\*\*” ( $P < 0.01$ ), and “\*\*\*\*” ( $P < 0.001$ ).

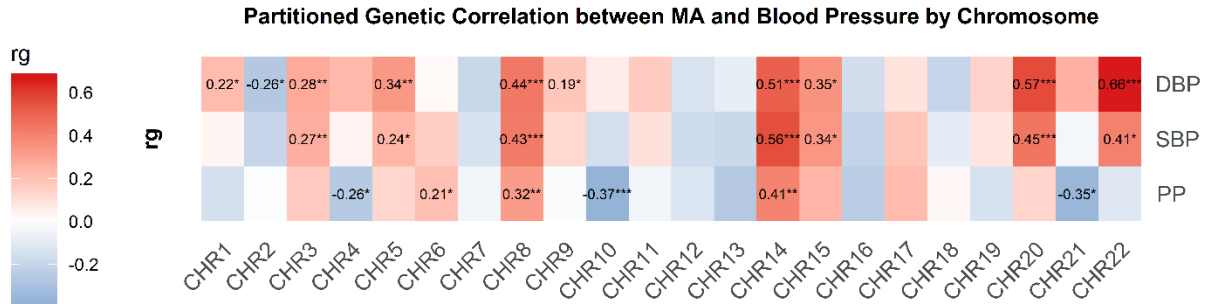

**Supplementary Figure 14 Partitioned genetic correlation between migraine with aura (MA) and blood pressure by different chromosomes.** Colors represent the estimated annotation specific genetic correlation between migraine with aura (MA) and BP traits (DBP, SBP, and PP) using GNOVA, red for positive genetic correlation and blue for negative genetic correlation at the corresponding annotation. The significant effects ( $P < 0.05$ ) are labeled with  $r_g$ . The nominally significant effects are labeled with “\*” ( $P < 0.05$ ), “\*\*” ( $P < 0.01$ ), and “\*\*\*” ( $P < 0.001$ ).

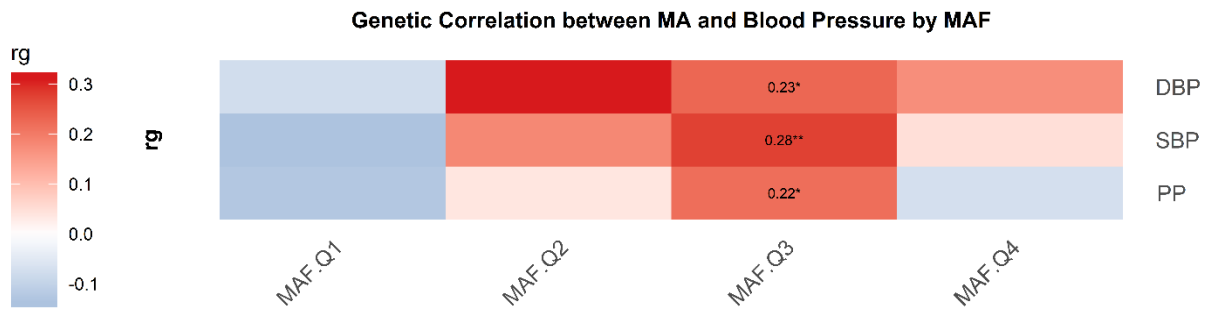

**Supplementary Figure 15 Partitioned genetic correlation between migraine with aura (MA) and blood pressure by minor allele frequency (MAF) quartiles.** Colors represent the estimated annotation specific genetic correlation between migraine with aura (MA) and BP traits (DBP, SBP, and PP) using GNOVA, red for positive genetic correlation and blue for negative genetic correlation at the corresponding annotation. The significant effects ( $P < 0.05$ ) are labeled with  $r_g$ . The nominally significant effects are labeled with “\*” ( $P < 0.05$ ), “\*\*” ( $P < 0.01$ ), and “\*\*\*” ( $P < 0.001$ ).

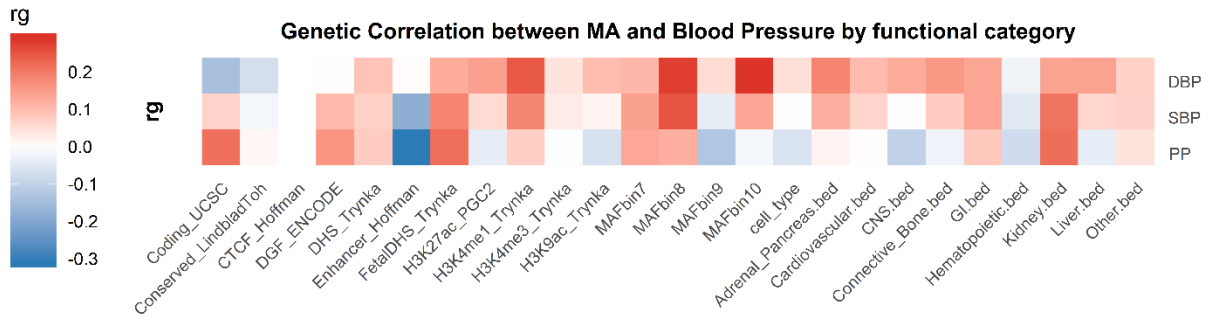

**Supplementary Figure 16 Partitioned genetic correlation between migraine with aura (MA) and blood pressure by different functional categories.** Colors represent the estimated annotation specific genetic correlation between migraine with aura (MA) and BP traits (DBP, SBP, and PP) using GNOVA, red for positive genetic correlation and blue for negative genetic correlation at the corresponding annotation. The significant effects ( $P < 0.05$ ) are labeled with  $r_g$ . The nominally significant effects are labeled with “\*” ( $P < 0.05$ ), “\*\*” ( $P < 0.01$ ), and “\*\*\*” ( $P < 0.001$ ).

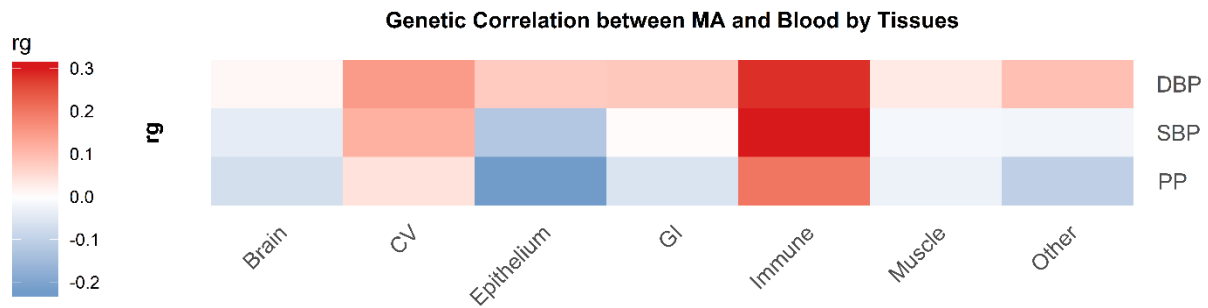

**Supplementary Figure 17 Partitioned genetic correlation between migraine with aura (MA) and blood pressure by seven tissues based on GenoSkyline-Plus annotations.** Colors represent the estimated annotation specific genetic correlation between migraine with aura (MA) and BP traits (DBP, SBP, and PP) using GNOVA, red for positive genetic correlation and blue for negative genetic correlation at the corresponding annotation. The significant effects ( $P < 0.05$ ) are labeled with  $r_g$ . The nominally significant effects are labeled with “\*” ( $P < 0.05$ ), “\*\*” ( $P < 0.01$ ), and “\*\*\*” ( $P < 0.001$ ).



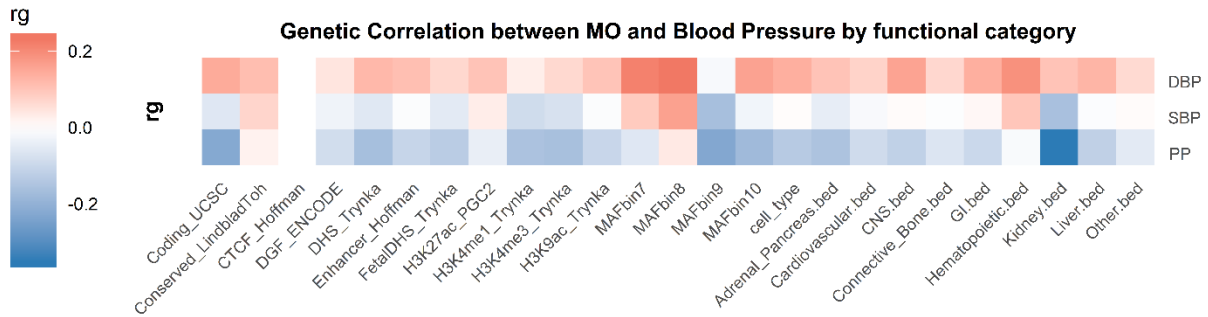

**Supplementary Figure 20 Partitioned genetic correlation between migraine without aura (MO) and blood pressure by different functional categories.** Colors represent the estimated annotation specific genetic correlation between migraine without aura (MO) and BP traits (DBP, SBP, and PP) using GNOVA, red for positive genetic correlation and blue for negative genetic correlation at the corresponding annotation. The significant effects ( $P < 0.05$ ) are labeled with  $r_g$ . The nominally significant effects are labeled with “\*” ( $P < 0.05$ ), “\*\*” ( $P < 0.01$ ), and “\*\*\*” ( $P < 0.001$ ).

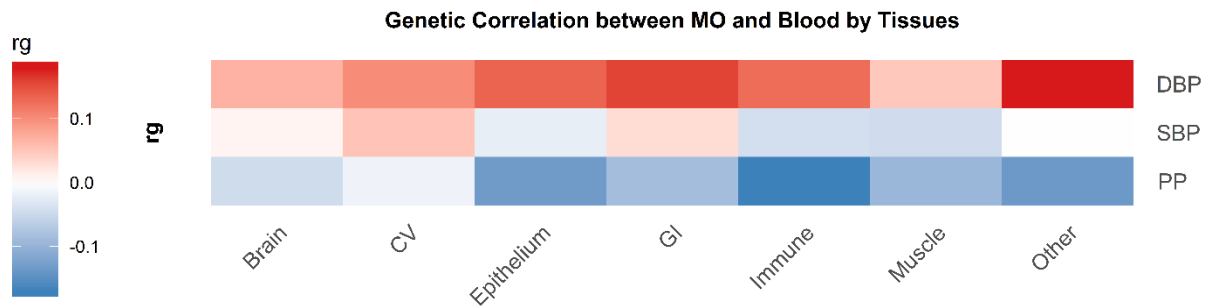

**Supplementary Figure 21 Partitioned genetic correlation between migraine without aura (MO) and blood pressure by seven tissues based on GenoSkyline-Plus annotations.** Colors represent the estimated annotation specific genetic correlation between migraine without aura (MO) and BP traits (DBP, SBP, and PP) using GNOVA, red for positive genetic correlation and blue for negative genetic correlation at the corresponding annotation. The significant effects ( $P < 0.05$ ) are labeled with  $r_g$ . The nominally significant effects are labeled with “\*” ( $P < 0.05$ ), “\*\*” ( $P < 0.01$ ), and “\*\*\*” ( $P < 0.001$ ).



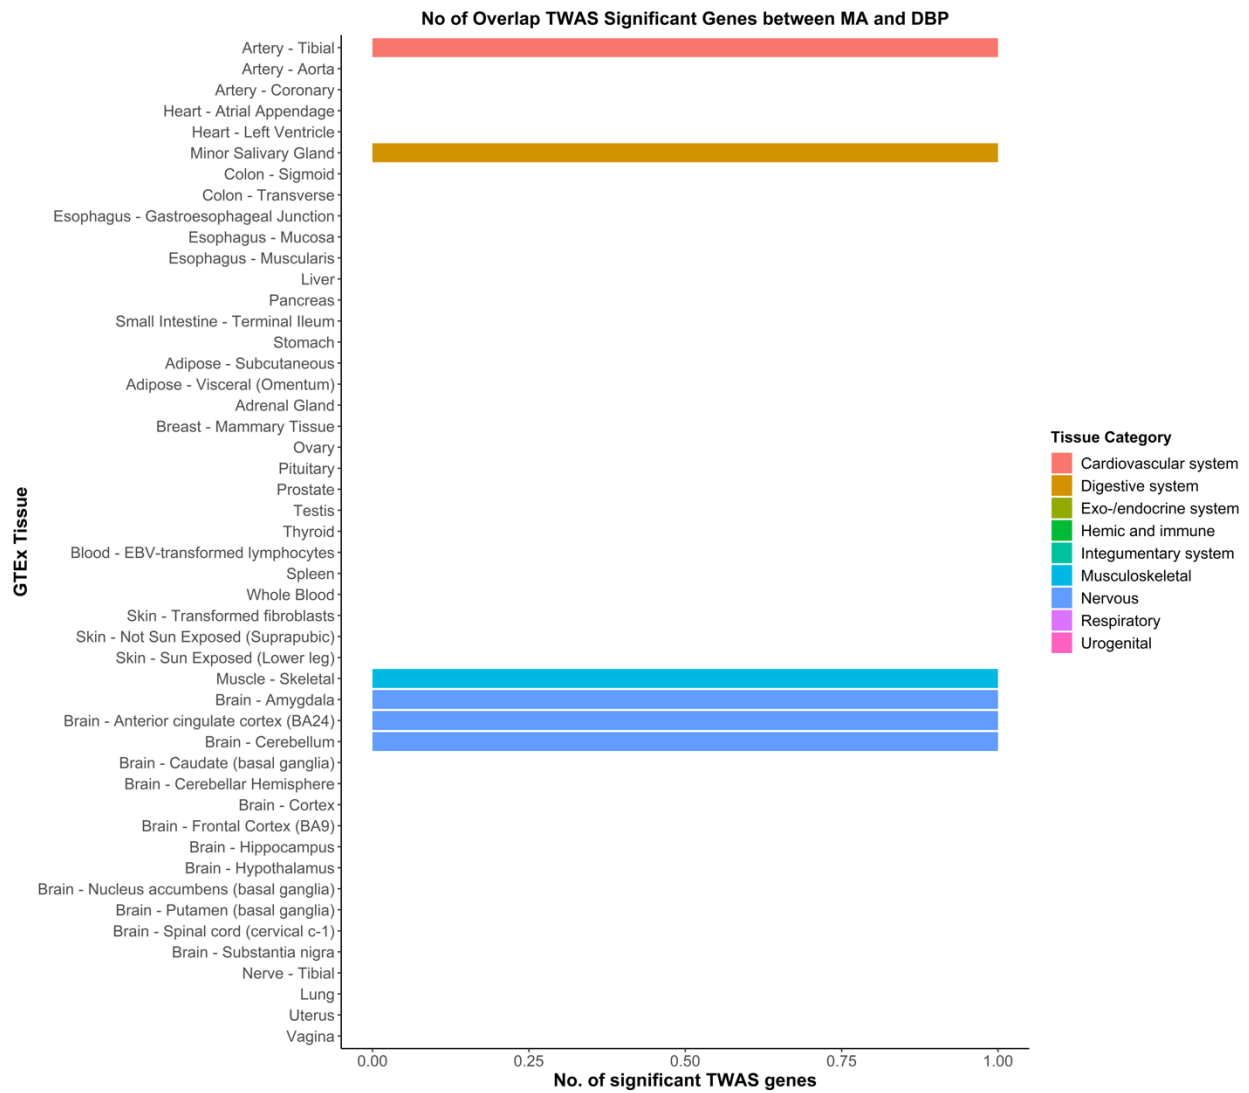

**Supplementary Figure 22** The number of shared TWAS significant genes between migraine with aura (MA) and diastolic blood pressure (DBP) across 48 GTEx tissues. Colors represent different tissue categories.

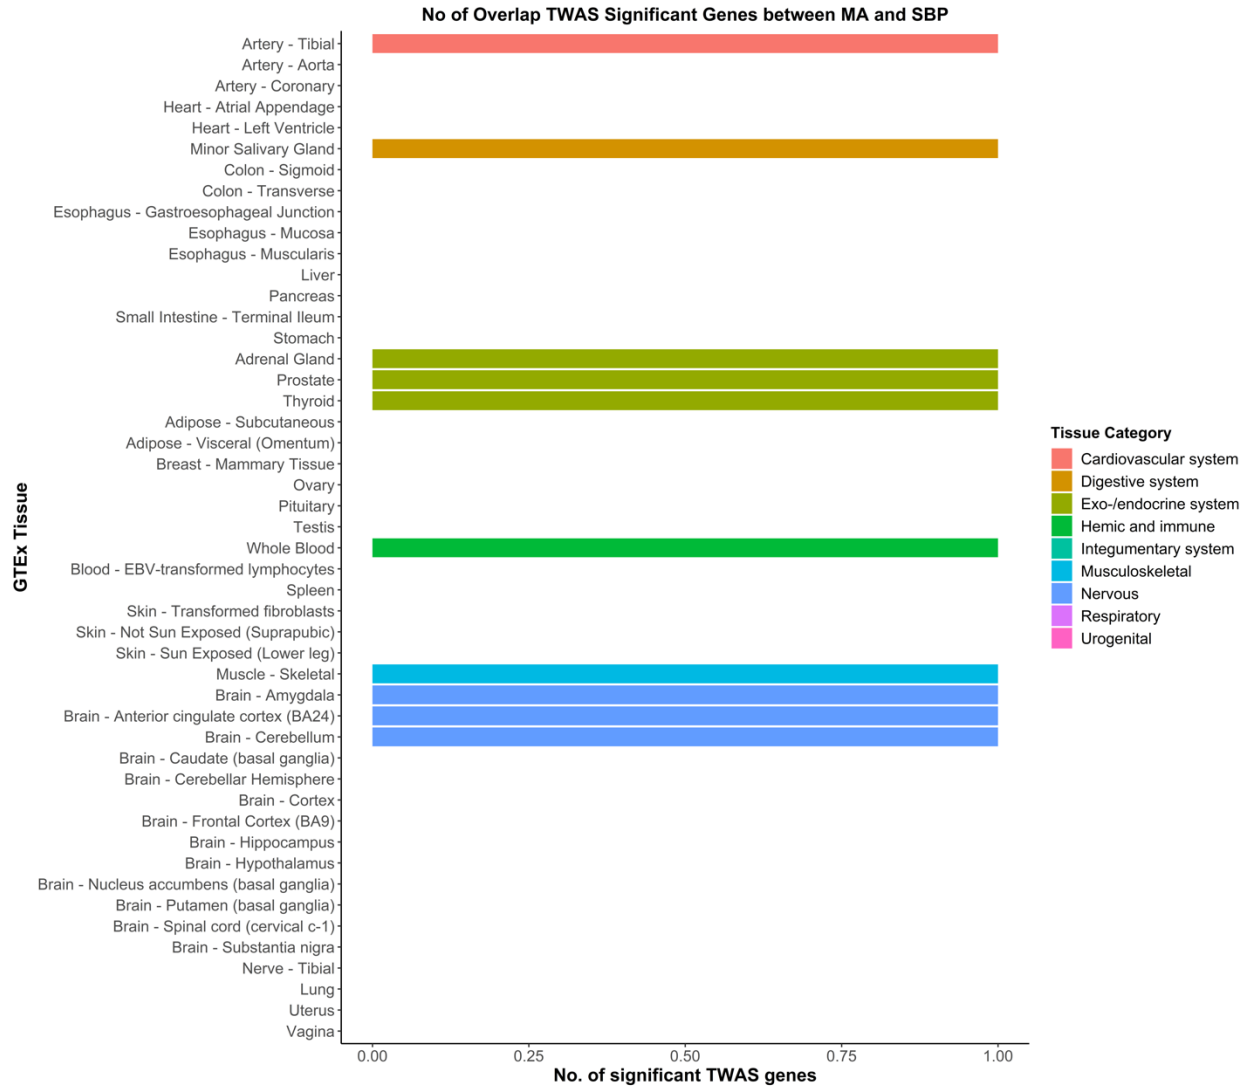

**Supplementary Figure 23** The number of shared TWAS significant genes between migraine with aura (MA) and systolic blood pressure (SBP) across 48 GTEx tissues. Colors represent different tissue categories.

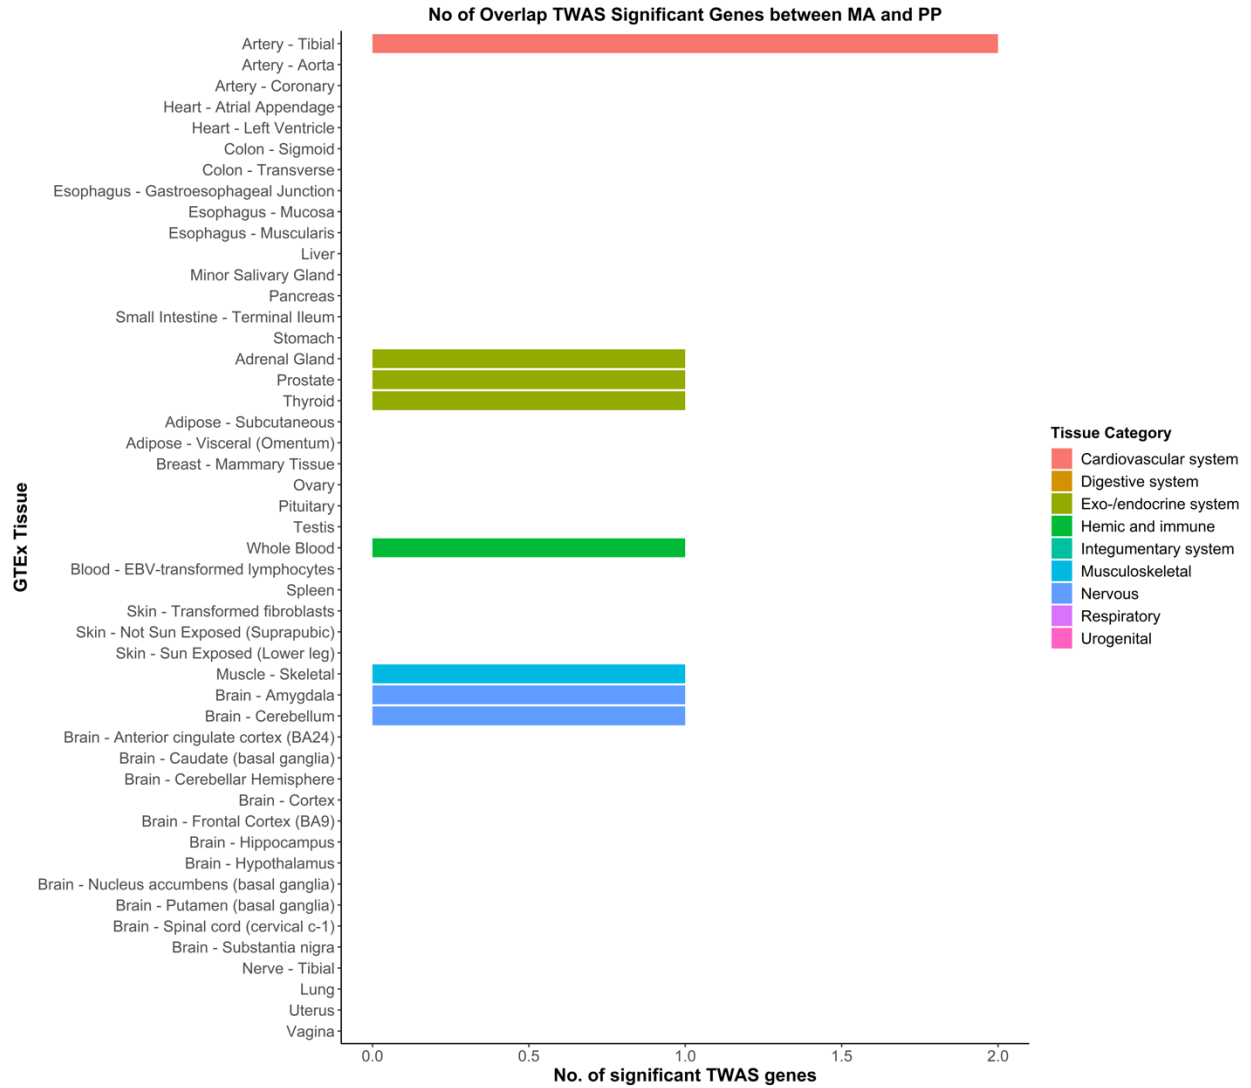

**Supplementary Figure 24** The number of shared TWAS significant genes between migraine with aura (MA) and pulse pressure (PP) across 48 GTEx tissues. Colors represent different tissue categories.

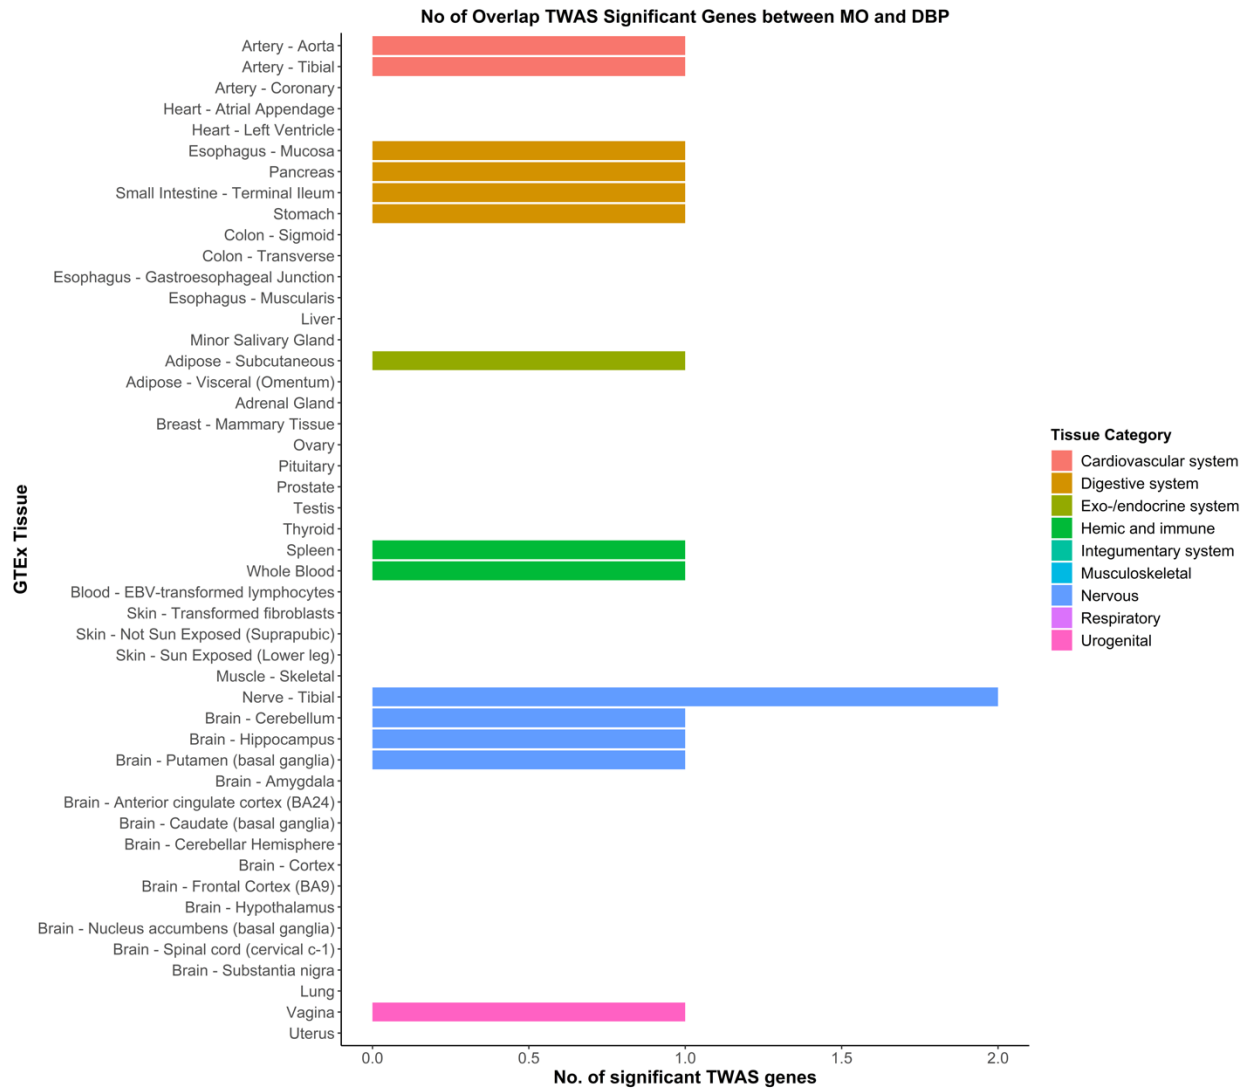

**Supplementary Figure 25** The number of shared TWAS significant genes between migraine without aura (MO) and diastolic blood pressure (DBP) across 48 GTEx tissues. Colors represent different tissue categories.

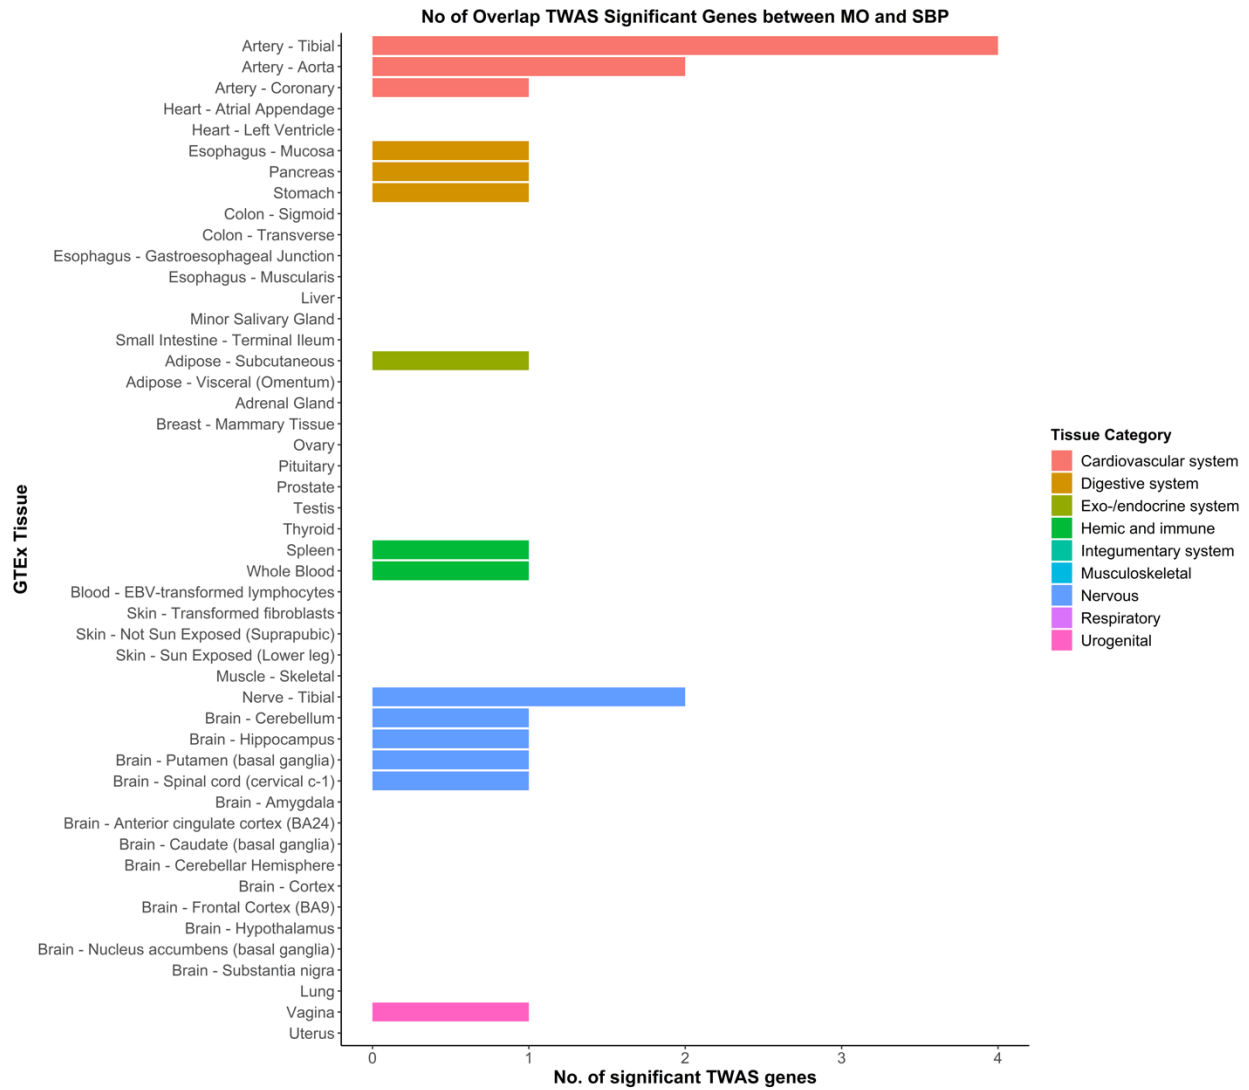

**Supplementary Figure 26** The number of shared TWAS significant genes between migraine without aura (MO) and systolic blood pressure (SBP) across 48 GTEx tissues. Colors represent different tissue categories.

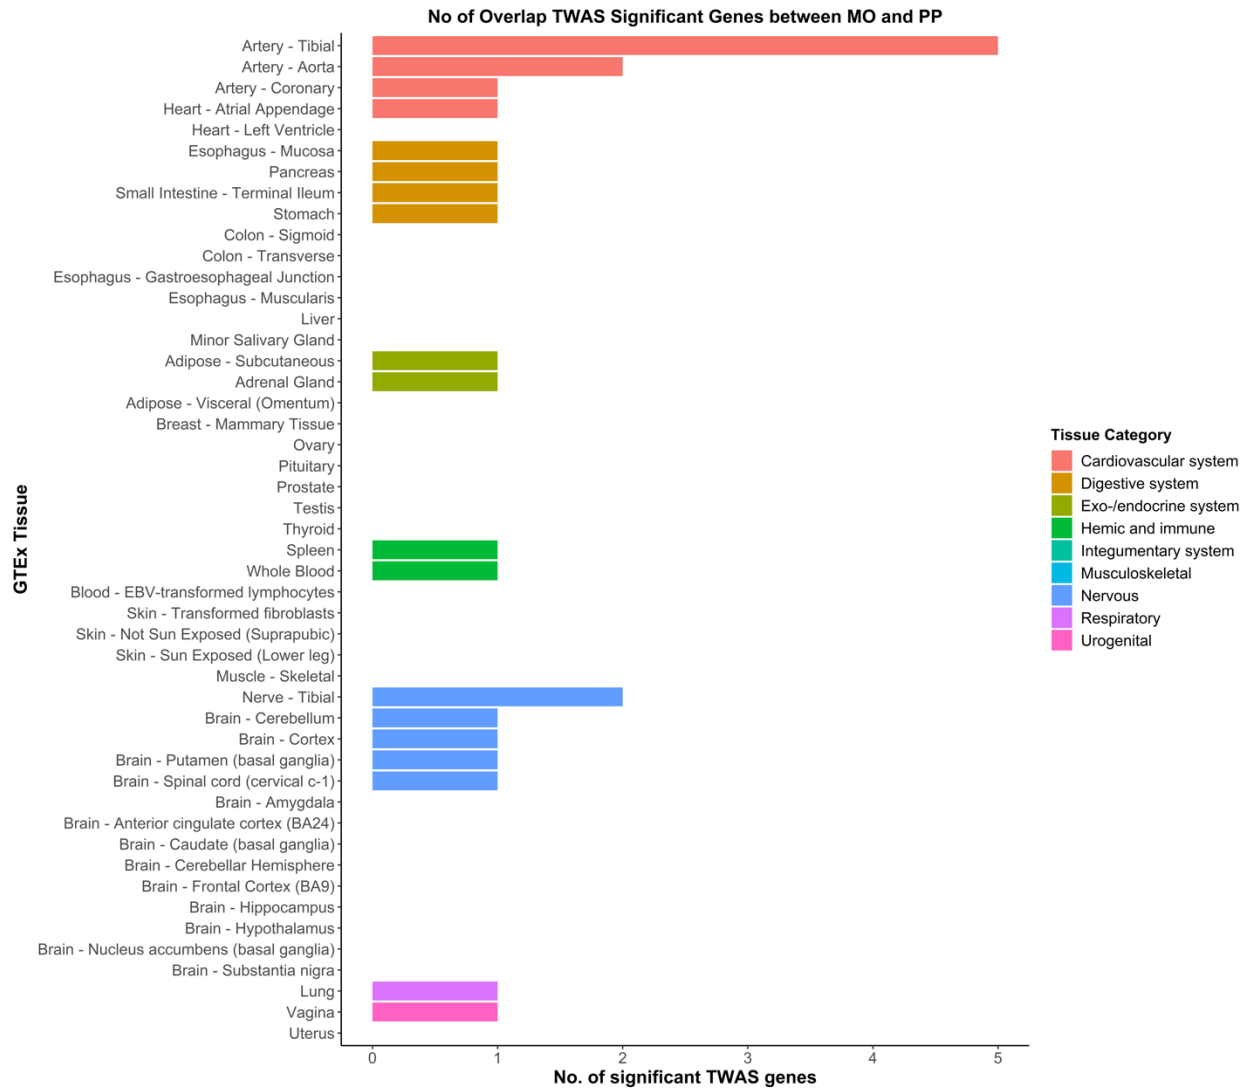

**Supplementary Figure 27** The number of shared TWAS significant genes between migraine without aura (MO) and pulse pressure (PP) across 48 GTEx tissues. Colors represent different tissue categories.

### Instrumental estimates between migraine and BP at different thresholds

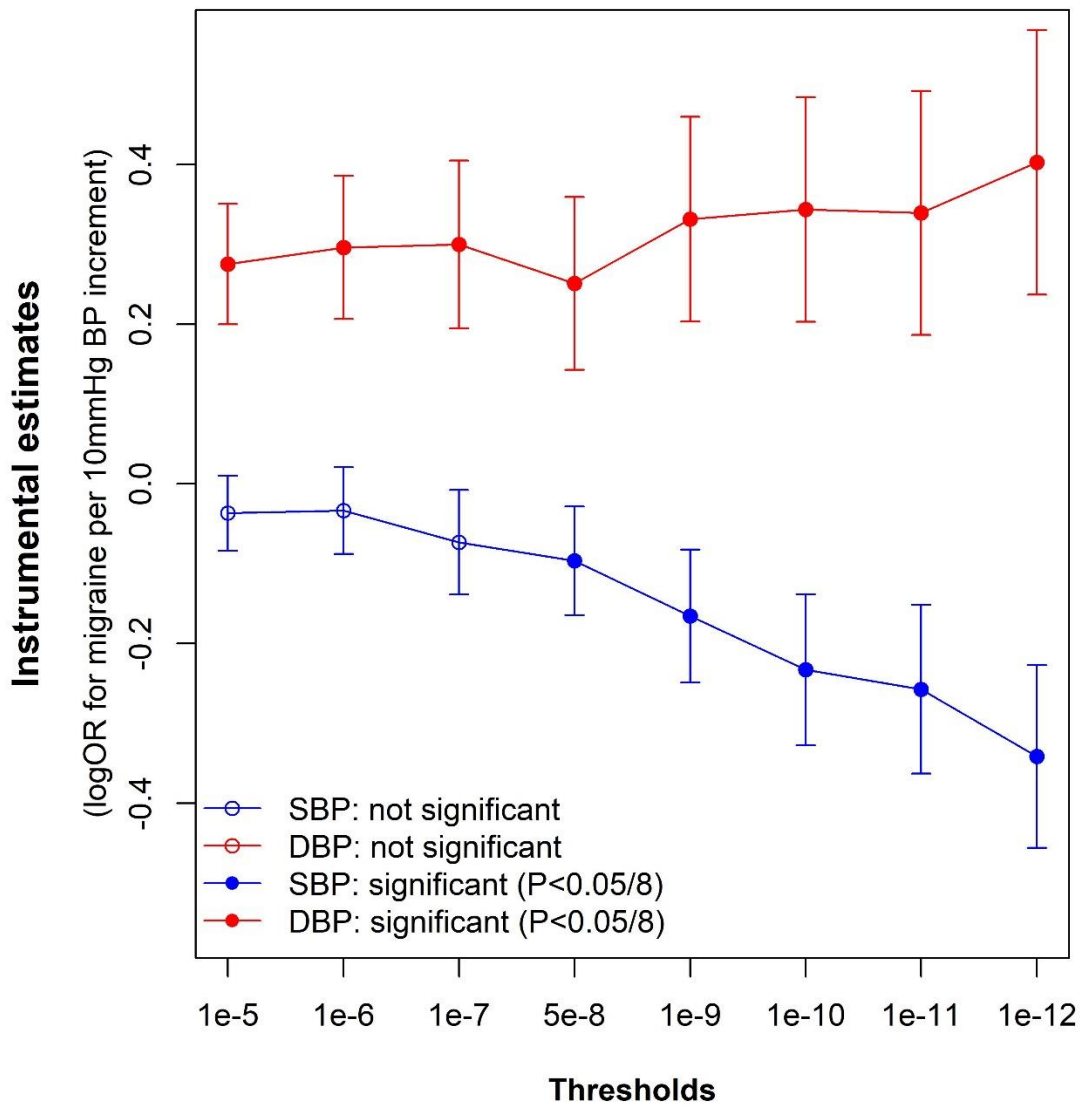

**Supplementary Figure 28 Instrumental estimates for migraine per 10mmHg increment of SBP and DBP by restricting SNPs that are not associated with DBP and SBP ( $P > 0.05$ ).** For SBP, SNPs that were related with DBP ( $P_{Gwas}$  for DBP  $\leq 0.05$ ) were removed and then used the summary statistics for the remaining SNPs to run GSMR at eight different thresholds (1e-5, 1e-6, 1e-7, 5e-8, 1e-9, 1e-10, 1e-11, and 1e-12). For DBP, SNPs that were related with SBP ( $P_{Gwas}$  for SBP  $\leq 0.05$ ) were removed and conducted GSMR for DBP.

### Instrumental estimates between blood pressure and cardiovascular diseases at different thresholds

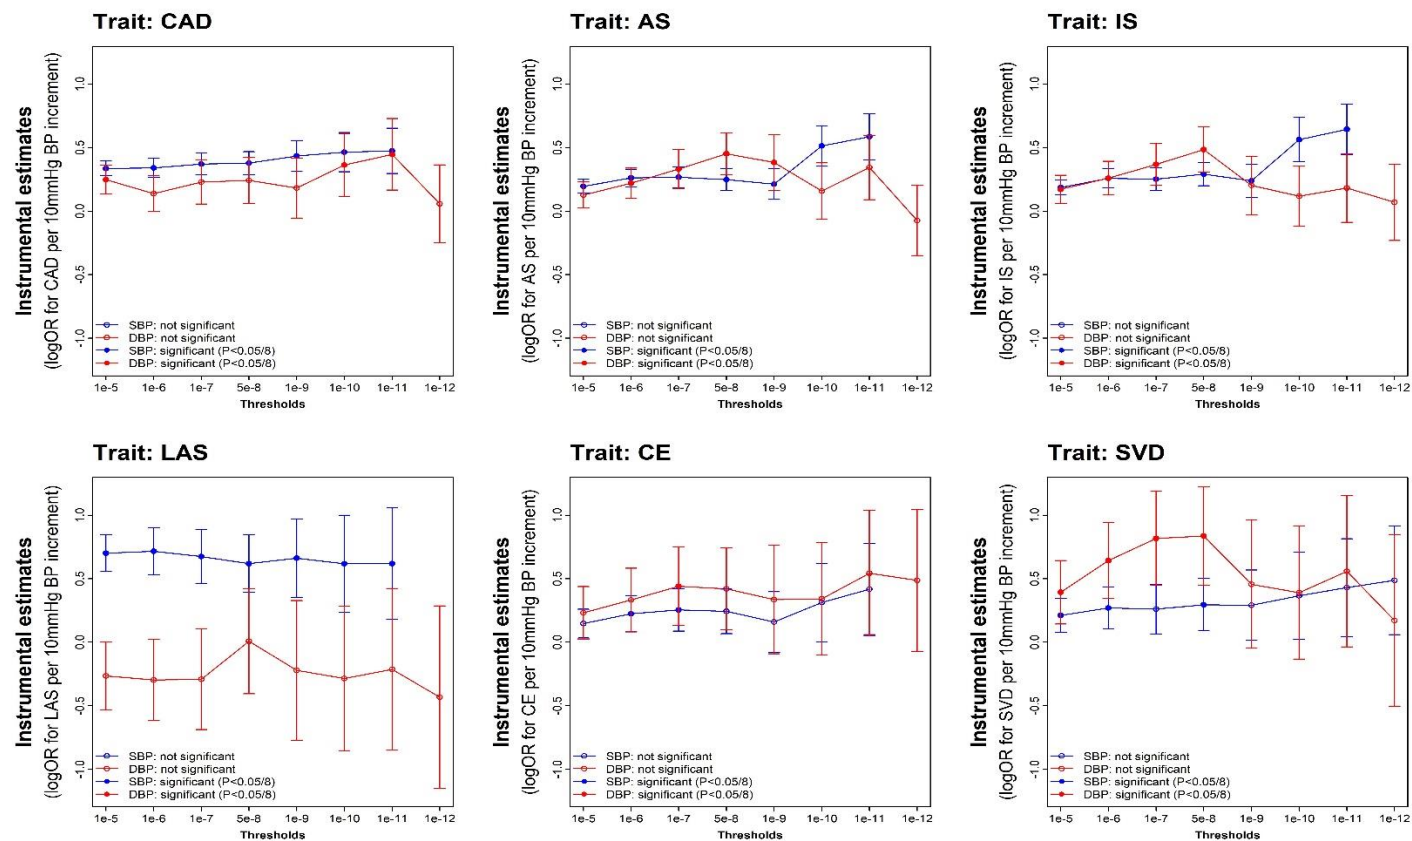

**Supplementary Figure 29** Instrumental estimates for cardiovascular comorbidities of migraine per 10mmHg increment of SBP and DBP by restricting SNPs that are not associated with DBP and SBP ( $P > 0.05$ ). For SBP, SNPs that were related with DBP ( $P_{G_{WAS}}$  for  $DBP \leq 0.05$ ) were removed and then used the summary statistics for the remaining SNPs to run GSMR at eight different thresholds (1e-5, 1e-6, 1e-7, 5e-8, 1e-9, 1e-10, 1e-11, and 1e-12). For DBP, SNPs that were related with SBP ( $P_{G_{WAS}}$  for  $SBP \leq 0.05$ ) were removed and conducted GSMR for DBP. CAD: coronary artery disease; AS: any stroke; IS: ischemic stroke; LAS: large artery stroke; CE: cardioembolic stroke; SVD: small vessel stroke.



**Author list for International Headache Genetics Consortium (IHGC) on paper “Meta-analysis of 375,000 individuals identifies 8 susceptibility loci for migraine”, *Nature Genetics*, 2016, 48(8):856-66. doi: 10.1038/ng.3598. [PubMed ID: 27322543].**

Padhraig Gormley<sup>\*1,2,3,4</sup>, Verner Anttila<sup>\*2,3,5</sup>, Bendik S Winsvold<sup>6,7,8</sup>, Priit Palta<sup>9</sup>, Tonu Esko<sup>2,10,11</sup>, Tune H. Pers<sup>2,11,12,13</sup>, Kai-How Farh<sup>2,5,14</sup>, Ester Cuenca-Leon<sup>1,2,3,15</sup>, Mikko Muona<sup>9,16,17,18</sup>, Nicholas A Furlotte<sup>19</sup>, Tobias Kurth<sup>20,21</sup>, Andres Ingason<sup>22</sup>, George McMahon<sup>23</sup>, Lannie Ligthart<sup>24</sup>, Gisela M Terwindt<sup>25</sup>, Mikko Kallela<sup>26</sup>, Tobias M Freilinger<sup>27,28</sup>, Caroline Ran<sup>29</sup>, Scott G Gordon<sup>30</sup>, Anine H Stam<sup>25</sup>, Stacy Steinberg<sup>22</sup>, Guntram Borck<sup>31</sup>, Markku Koiranen<sup>32</sup>, Lydia Quaye<sup>33</sup>, Hieab HH Adams<sup>34,35</sup>, Terho Lehtimäki<sup>36</sup>, Antti-Pekka Sarin<sup>9</sup>, Juho Wedenoja<sup>37</sup>, David A Hinds<sup>19</sup>, Julie E Buring<sup>21,38</sup>, Markus Schürks<sup>39</sup>, Paul M Ridker<sup>21,38</sup>, Maria Gudlaug Hrafnodottir<sup>40</sup>, Hreinn Stefansson<sup>22</sup>, Susan M Ring<sup>23</sup>, Jouke-Jan Hottenga<sup>24</sup>, Brenda WJH Penninx<sup>41</sup>, Markus Färkkilä<sup>26</sup>, Ville Arto<sup>26</sup>, Mari Kaunisto<sup>9</sup>, Salli Vepsäläinen<sup>26</sup>, Rainer Malik<sup>27</sup>, Andrew C Heath<sup>42</sup>, Pamela A F Madden<sup>42</sup>, Nicholas G Martin<sup>30</sup>, Grant W Montgomery<sup>30</sup>, Mitja Kurki<sup>1,2,3</sup>, Mart Kals<sup>10</sup>, Reedik Mägi<sup>10</sup>, Kalle Pärn<sup>10</sup>, Eija Hämäläinen<sup>9</sup>, Hailiang Huang<sup>2,3,5</sup>, Andrea E Byrnes<sup>2,3,5</sup>, Lude Franke<sup>43</sup>, Jie Huang<sup>4</sup>, Evie Stergiakouli<sup>23</sup>, Phil H Lee<sup>1,2,3</sup>, Cynthia Sandor<sup>44</sup>, Caleb Webber<sup>44</sup>, Zameel Cader<sup>45,46</sup>, Bertram Muller-Myhsok<sup>47</sup>, Stefan Schreiber<sup>48</sup>, Thomas Meitinger<sup>49</sup>, Johan G Eriksson<sup>50,51</sup>, Veikko Salomaa<sup>51</sup>, Kauko Heikkilä<sup>52</sup>, Elizabeth Loehrer<sup>34,53</sup>, Andre G Uitterlinden<sup>54</sup>, Albert Hofman<sup>34</sup>, Cornelia M van Duijn<sup>34</sup>, Lynn Cherkas<sup>33</sup>, Linda M. Pedersen<sup>6</sup>, Audun Stubhaug<sup>55,56</sup>, Christopher S Nielsen<sup>55,57</sup>, Minna Männikkö<sup>32</sup>, Evelin Mihailov<sup>10</sup>, Lili Milani<sup>10</sup>, Hartmut Göbel<sup>58</sup>, Ann-Louise Esserlind<sup>59</sup>, Anne Francke Christensen<sup>59</sup>, Thomas Folkmann Hansen<sup>60</sup>, Thomas Werge<sup>61,62,63</sup>, International Headache Genetics Consortium<sup>64</sup>, Jaakko Kaprio<sup>9,65,66</sup>, Arpo J Aroma<sup>51</sup>, Olli Raitakari<sup>67,68</sup>, M Arfan Ikram<sup>34,35,68</sup>, Tim Spector<sup>33</sup>, Marjo-Riitta Järvelin<sup>32,70,71,72</sup>, Andres Metspalu<sup>10</sup>, Christian Kubisch<sup>73</sup>, David P Strachan<sup>74</sup>, Michel D Ferrari<sup>25</sup>, Andrea C Belin<sup>29</sup>, Martin Dichgans<sup>27,75</sup>, Maija Wessman<sup>9,16</sup>, Arn MJM van den Maagdenberg<sup>25,76</sup>, John-Anker Zwart<sup>6,7,8</sup>, Dorret I Boomsma<sup>24</sup>, George Davey Smith<sup>23</sup>, Kari Stefansson<sup>22,77</sup>, Nicholas Eriksson<sup>19</sup>, Mark J Daly<sup>2,3,5</sup>, Benjamin M Neale<sup>8,2,3,5</sup>, Jes Olesen<sup>8,59</sup>, Daniel I Chasman<sup>8,21,38</sup>, Dale R Nyholt<sup>8,78</sup>, and Aarno Palotie<sup>8,1,2,3,4,5,9,79</sup>.

**Affiliations at the time the manuscript was published:**

<sup>1</sup>Psychiatric and Neurodevelopmental Genetics Unit, Massachusetts General Hospital and Harvard Medical School, Boston, USA. <sup>2</sup>Medical and Population Genetics Program, Broad Institute of MIT and Harvard, Cambridge, USA. <sup>3</sup>Stanley Center for Psychiatric Research, Broad Institute of MIT and Harvard, Cambridge, USA. <sup>4</sup>Wellcome Trust Sanger Institute, Wellcome Trust Genome Campus, Hinxton, UK. <sup>5</sup>Analytic and Translational Genetics Unit, Massachusetts General Hospital and Harvard Medical School, Boston, USA. <sup>6</sup>FORMI, Oslo University Hospital, P.O. 4956 Nydalen, 0424 Oslo, Norway. <sup>7</sup>Department of Neurology, Oslo University Hospital, P.O. 4956 Nydalen, 0424 Oslo, Norway. <sup>8</sup>Institute of Clinical Medicine, University of Oslo, P.O. 1171 Blindern, 0318 Oslo, Norway. <sup>9</sup>Institute for Molecular Medicine Finland (FIMM), University of Helsinki, Helsinki, Finland. <sup>10</sup>Estonian Genome Center, University of Tartu, Tartu, Estonia. <sup>11</sup>Division of Endocrinology, Boston Children's Hospital, Boston, USA. <sup>12</sup>Statens Serum Institut, Dept of Epidemiology Research, Copenhagen, Denmark. <sup>13</sup>Novo Nordisk Foundation Center for Basic Metabolic Research, University of Copenhagen, Copenhagen, Denmark. <sup>14</sup>llumina, 5200 Illumina Way, San Diego, USA. <sup>15</sup>Vall d'Hebron Research Institute, Pediatric Neurology, Barcelona, Spain. <sup>16</sup>Folkhälsan Institute of Genetics, Helsinki, Finland, FI-00290. <sup>17</sup>Neuroscience Center, University of Helsinki, Helsinki, Finland, FI-00014. <sup>18</sup>Research Programs Unit, Molecular Neurology, University of Helsinki, Helsinki, Finland, FI-00014. <sup>19</sup>23andMe, Inc., 899 W. Evelyn Avenue, Mountain View, CA, USA. <sup>20</sup>Inserm Research Center for Epidemiology and Biostatistics (U897), University of Bordeaux, 33076 Bordeaux, France. <sup>21</sup>Division of Preventive Medicine, Brigham and Women's Hospital, Boston MA 02215. <sup>22</sup>deCODE Genetics, 101 Reykjavik, Iceland. <sup>23</sup>Medical Research Council (MRC) Integrative Epidemiology Unit, University of Bristol, Bristol, UK. <sup>24</sup>VU University Amsterdam, Department of Biological Psychology, Amsterdam, the Netherlands, 1081 BT. <sup>25</sup>Leiden University Medical Center, Department of Neurology, Leiden, The Netherlands, PO Box 9600, 2300 RC. <sup>26</sup>Department of Neurology, Helsinki University Central Hospital, Haartmaninkatu 4, 00290 Helsinki, Finland. <sup>27</sup>Institute for Stroke and Dementia Research, Klinikum der Universität München, Ludwig-Maximilians-Universität München, Feodor-Lynen-Str. 17, 81377 Munich Germany. <sup>28</sup>Department of Neurology and Epileptology, Hertie Institute for Clinical Brain Research, University of Tuebingen. <sup>29</sup>Karolinska Institutet, Department of Neuroscience, 171 77 Stockholm, Sweden. <sup>30</sup>Department of Genetics and Computational Biology, QIMR Berghofer Medical Research Institute, 300 Herston Road, Brisbane, QLD 4006, Australia. <sup>31</sup>Ulm University, Institute of Human Genetics, 89081 Ulm, Germany. <sup>32</sup>University of Oulu, Center for Life Course Epidemiology and Systems Medicine, Oulu, Finland, Box 5000, Fin-90014 University of Oulu. <sup>33</sup>Department of Twin Research and Genetic Epidemiology, King's College London, London, UK. <sup>34</sup>Dept of Epidemiology, Erasmus University Medical Center, Rotterdam, the Netherlands, 3015 CN. <sup>35</sup>Dept of Radiology, Erasmus University Medical Center, Rotterdam, the Netherlands, 3015 CN. <sup>36</sup>Department of Clinical Chemistry, Fimlab Laboratories, and School of Medicine, University of Tampere, Tampere, Finland, 33520. <sup>37</sup>Department of Public Health, University of Helsinki, Helsinki, Finland. <sup>38</sup>Harvard Medical School, Boston MA 02115. <sup>39</sup>University Duisburg Essen, Essen, Germany. <sup>40</sup>Landspítali University Hospital, 101 Reykjavik, Iceland. <sup>41</sup>VU University Medical Centre, Department of Psychiatry, Amsterdam, the Netherlands, 1081 HL. <sup>42</sup>Department of Psychiatry, Washington University School of Medicine, 660 South Euclid, CB 8134, St. Louis, MO 63110, USA. <sup>43</sup>University Medical Center Groningen, University of Groningen, Groningen, The Netherlands, 9700RB. <sup>44</sup>MRC Functional Genomics Unit, Department of Physiology, Anatomy & Genetics, Oxford University, UK. <sup>45</sup>Nuffield Department of Clinical Neuroscience, University of Oxford, UK. <sup>46</sup>Oxford Headache Centre, John Radcliffe Hospital, Oxford, UK. <sup>47</sup>Max-Planck-Institute of Psychiatry, Munich, Germany. <sup>48</sup>Christian Albrechts University, Kiel, Germany. <sup>49</sup>Institute of Human Genetics, Helmholtz Center Munich, Neuherberg, Germany. <sup>50</sup>Department of General Practice and Primary Health Care, University of Helsinki and Helsinki University Hospital, Helsinki Finland. <sup>51</sup>National Institute for Health and Welfare, Helsinki, Finland. <sup>52</sup>Institute of Clinical Medicine, University of Helsinki, Helsinki, Finland. <sup>53</sup>Department of Environmental Health, Harvard T.H. Chan School of Public Health, Boston, USA 02115. <sup>54</sup>Dept of Internal Medicine, Erasmus University Medical Center, Rotterdam, the Netherlands, 3015 CN. <sup>55</sup>Dept of Pain Management and Research, Oslo University Hospital, Oslo, 0424 Oslo, Norway. <sup>56</sup>Medical Faculty, University of Oslo, Oslo, 0318 Oslo, Norway. <sup>57</sup>Division of Mental Health, Norwegian Institute of Public Health, P.O. Box 4404 Nydalen, Oslo, Norway, NO-0403. <sup>58</sup>Kiel Pain and Headache Center, 24149 Kiel, Germany. <sup>59</sup>Danish Headache Center, Department of Neurology, Rigshospitalet, Glostrup Hospital, University of Copenhagen, Denmark. <sup>60</sup>Institute of Biological Psychiatry, Mental Health Center Sct. Hans, University of Copenhagen, Roskilde, Denmark.

<sup>61</sup>Institute Of Biological Psychiatry, MHC Sct. Hans, Mental Health Services Copenhagen, DK-2100 Copenhagen, Denmark. <sup>62</sup>Institute of Clinical Sciences, Faculty of Medicine and Health Sciences, University of Copenhagen, DK-2100 Copenhagen, Denmark. <sup>63</sup>iPSYCH - The Lundbeck Foundation's Initiative for Integrative Psychiatric Research, DK-2100 Copenhagen, Denmark. <sup>64</sup>A list of members and affiliations appears in the Supplementary Note. <sup>65</sup>Department of Public Health, University of Helsinki, Helsinki, Finland. <sup>66</sup>Department of Health, National Institute for Health and Welfare, Helsinki, Finland. <sup>67</sup>Research Centre of Applied and Preventive Cardiovascular Medicine, University of Turku, Turku, Finland, 20521. <sup>68</sup>Department of Clinical Physiology and Nuclear Medicine, Turku University Hospital, Turku, Finland, 20521. <sup>69</sup>Dept of Neurology, Erasmus University Medical Center, Rotterdam, the Netherlands, 3015 CN. <sup>70</sup>Imperial College London, Department of Epidemiology and Biostatistics, MRC Health Protection Agency (HPE) Centre for Environment and Health, School of Public Health, UK, W2 1PG. <sup>71</sup>University of Oulu, Biocenter Oulu, Finland, Box 5000, Fin-90014 University of Oulu. <sup>72</sup>Oulu University Hospital, Unit of Primary Care, Oulu, Finland, Box 10, Fin-90029 OYS. <sup>73</sup>University Medical Center Hamburg Eppendorf, Institute of Human Genetics, 20246 Hamburg, Germany. <sup>74</sup>Population Health Research Institute, St George's, University of London, Cranmer Terrace, London SW17 0RE, UK. <sup>75</sup>Munich Cluster for Systems Neurology (SyNergy), Munich, Germany. <sup>76</sup>Leiden University Medical Centre, Department of Human Genetics, Leiden, The Netherlands, PO Box 9600, 2300 RC. <sup>77</sup>Faculty of Medicine, University of Iceland, 101 Reykjavik, Iceland. <sup>78</sup>Statistical and Genomic Epidemiology Laboratory, Institute of Health and Biomedical Innovation, Queensland University of Technology, 60 Musk Ave, Kelvin Grove, QLD 4059, Australia. <sup>79</sup>Department of Neurology, Massachusetts General Hospital, Boston, USA.

\* These authors contributed equally to this work. <sup>§</sup> These authors jointly supervised this work.

Author list for MEGASTROKE Consortium on paper “Multiancestry genome-wide association study of 520,000 subjects identifies 32 loci associated with stroke and stroke subtypes”, *Nature Genetics*, 2018, 50: 524-537. doi:10.1038/s41588-018-0058-3 [PubMed ID: 29531354].

#### MEGASTROKE CONSORTIUM

Rainer Malik <sup>1</sup>, Ganesh Chauhan <sup>2</sup>, Matthew T aylor <sup>3</sup>, Muralidharan Sargurupremraj <sup>4,5</sup>, Yukinori Okada <sup>6,7,8</sup>, Aniket Mishra <sup>4,5</sup>, Loes Rutten-Jacobs <sup>3</sup>, Anne-Katrin Giese <sup>9</sup>, Sander W van der Laan <sup>10</sup>, Solveig Gretarsdottir <sup>11</sup>, Christopher D Anderson <sup>12,13,14,14</sup>, Michael Chong <sup>15</sup>, Hieab HH Adams <sup>16,17</sup>, Tetsuro Ago <sup>18</sup>, Peter Almgren <sup>19</sup>, Philippe Amouyel <sup>20,21</sup>, Hakan Ay <sup>22,13</sup>, Traci M Bartz <sup>23</sup>, Oscar R Benavente <sup>24</sup>, Steve Bevan <sup>25</sup>, Giorgio B Boncoraglio <sup>26</sup>, Robert D Brown, Jr. <sup>27</sup>, Adam S Butterworth <sup>28,29</sup>, Caty Carrera <sup>30,31</sup>, Cara L Carty <sup>32,33</sup>, Daniel I Chasman <sup>34,35</sup>, Wei-Min Chen <sup>36</sup>, John W Cole <sup>37</sup>, Adolfo Correa <sup>38</sup>, Ioana Cotlarciuc <sup>39</sup>, Carlos Cruchaga <sup>40,41</sup>, John Danesh <sup>28,42,43,44</sup>, Paul IW de Bakker <sup>45,46</sup>, Anita L DeStefano <sup>47,48</sup>, Marcel den Hoed <sup>49</sup>, Qing Duan <sup>50</sup>, Stefan T Engelter <sup>51,52</sup>, Guido J Falcone <sup>53,54</sup>, Rebecca F Gottesman <sup>55</sup>, Raji P Grewal <sup>56</sup>, Vilmundur Gudnason <sup>57,58</sup>, Stefan Gustafsson <sup>59</sup>, Jeffrey Haessler <sup>60</sup>, Tamara B Harris <sup>61</sup>, Ahamad Hassan <sup>62</sup>, Aki S Havulinna <sup>63,64</sup>, Susan R Heckbert <sup>65</sup>, Elizabeth G Holliday <sup>66,67</sup>, George Howard <sup>68</sup>, Fang-Chi Hsu <sup>69</sup>, Hyacinth I Hyacinth <sup>70</sup>, M Arfan Ikram <sup>16</sup>, Erik Ingelsson <sup>71,72</sup>, Marguerite R Irvin <sup>73</sup>, Xueqiu Jian <sup>74</sup>, Jordi Jiménez-Conde <sup>75</sup>, Julie A Johnson <sup>76,77</sup>, J Wouter Jukema <sup>78</sup>, Masahiro Kanai <sup>6,7,79</sup>, Keith L Keene <sup>80,81</sup>, Brett M Kissela <sup>82</sup>, Dawn O Kleindorfer <sup>82</sup>, Charles Kooperberg <sup>60</sup>, Michiaki Kubo <sup>83</sup>, Leslie A Lange <sup>84</sup>, Carl D Langefeld <sup>85</sup>, Claudia Langenberg <sup>86</sup>, Lenore J Launer <sup>87</sup>, Jin-Moo Lee <sup>88</sup>, Robin Lemmens <sup>89,90</sup>, Didier Leys <sup>91</sup>, Cathryn M Lewis <sup>92,93</sup>, Wei-Yu Lin <sup>28,94</sup>, Arne G Lindgren <sup>95,96</sup>, Erik Lorentzen <sup>97</sup>, Patrik K Magnusson <sup>98</sup>, Jane Maguire <sup>99</sup>, Ani Manichaikul <sup>36</sup>, Patrick F McArdle <sup>100</sup>, James F Meschia <sup>101</sup>, Braxton D Mitchell <sup>100,102</sup>, Thomas H Mosley <sup>103,104</sup>, Michael A Nalls <sup>105,106</sup>, Toshiharu Ninomiya <sup>107</sup>, Martin J O'Donnell <sup>15,108</sup>, Bruce M Psaty <sup>109,110,111,112</sup>, Sara L Pulit <sup>113,45</sup>, Kristiina Rannikmäe <sup>114,115</sup>, Alexander P Reiner <sup>65,116</sup>, Kathryn M Rexrode <sup>117</sup>, Kenneth Rice <sup>118</sup>, Stephen S Rich <sup>36</sup>, Paul M Ridker <sup>34,35</sup>, Natalia S Rost <sup>9,13</sup>, Peter M Rothwell <sup>119</sup>, Jerome I Rotter <sup>120,121</sup>, Tatjana Rundek <sup>122</sup>, Ralph L Sacco <sup>122</sup>, Saori Sakaue <sup>7,123</sup>, Michele M Sale <sup>124</sup>, Veikko Salomaa <sup>63</sup>, Bishwa R Sapkota <sup>125</sup>, Reinhold Schmidt <sup>126</sup>, Carsten O Schmidt <sup>127</sup>, Ulf Schminke <sup>128</sup>, Pankaj Sharma <sup>39</sup>, Agnieszka Slowik <sup>129</sup>, Cathie LM Sudlow <sup>114,115</sup>, Christian Tanislav <sup>130</sup>, Turgut Tatlisumak <sup>131,132</sup>, Kent D Taylor <sup>120,121</sup>, Vincent NS Thijs <sup>133,134</sup>, Gudmar Thorleifsson <sup>11</sup>, Unnur Thorsteinsdottir <sup>11</sup>, Steffen Tiedt <sup>1</sup>, Stella Trompet <sup>135</sup>, Christophe Tzourio <sup>5,136,137</sup>, Cornelia M van Duijn <sup>138,139</sup>, Matthew Walters <sup>140</sup>, Nicholas J Wareham <sup>86</sup>, Sylvia Wassertheil-Smoller <sup>141</sup>, James G Wilson <sup>142</sup>, Kerri L Wiggins <sup>109</sup>, Qiong Yang <sup>47</sup>, Salim Yusuf <sup>15</sup>, Najaf Amin <sup>16</sup>, Hugo S Aparicio <sup>185,48</sup>, Donna K Arnett <sup>186</sup>, John Attia <sup>187</sup>, Alexa S Beiser <sup>47,48</sup>, Claudine Berr <sup>188</sup>, Julie E Buring <sup>34,35</sup>, Mariana Bustamante <sup>189</sup>, Valeria Caso <sup>190</sup>, Yu-Ching Cheng <sup>191</sup>, Seung Hoan Choi <sup>192,48</sup>, Ayesha Chowhan <sup>185,48</sup>, Natalia Cullell <sup>31</sup>, Jean-François Dartigues <sup>193,194</sup>, Hossein Delavaran <sup>95,96</sup>, Pilar Delgado <sup>195</sup>, Marcus Dörr <sup>196,197</sup>, Gunnar Engström <sup>19</sup>, Ian Ford <sup>198</sup>, Wander S Gurpreet <sup>199</sup>, Anders Hamsten <sup>200,201</sup>, Laura Heitsch <sup>202</sup>, Atsushi Hozawa <sup>203</sup>, Laura Ibanez <sup>204</sup>, Andreea Ilinca <sup>95,96</sup>, Martin Ingelsson <sup>205</sup>, Motoki Iwasaki <sup>206</sup>, Rebecca D Jackson <sup>207</sup>, Katarina Jood <sup>208</sup>, Pekka Jousilahti <sup>63</sup>, Sara Kaffashian <sup>4,5</sup>, Lalit Kalra <sup>209</sup>, Masahiro Kamouchi <sup>210</sup>, Takanari Kitazono <sup>211</sup>, Olafur Kjartansson <sup>212</sup>, Manja Kloss <sup>213</sup>, Peter J Koudstaal <sup>214</sup>, Jerzy Krupinski <sup>215</sup>, Daniel L Labovitz <sup>216</sup>, Cathy C Laurie <sup>118</sup>, Christopher R Levi <sup>217</sup>, Linxin Li <sup>218</sup>, Lars Lind <sup>219</sup>, Cecilia M Lindgren <sup>220,221</sup>, Vasileios Lioutas <sup>222,48</sup>, Yong Mei Liu <sup>223</sup>, Oscar L Lopez <sup>224</sup>, Hirata Makoto <sup>225</sup>, Nicolas Martinez-Majander <sup>172</sup>, Koichi Matsuda <sup>225</sup>, Naoko Minegishi <sup>203</sup>, Joan Montaner <sup>226</sup>, Andrew P Morris <sup>227,228</sup>, Elena Muñio <sup>31</sup>, Martina Müller-Nurasyid <sup>229,230,231</sup>, Bo Norrving <sup>95,96</sup>, Soichi Ogishima <sup>203</sup>, Eugenio A Parati <sup>232</sup>, Leema Reddy Peddareddygar <sup>56</sup>, Nancy L Pedersen <sup>98,233</sup>, Joanna Pera <sup>129</sup>, Markus Perola <sup>63,234</sup>, Alessandro Pezzini <sup>235</sup>, Silvana Pileggi <sup>236</sup>, Raquel Rabionet <sup>237</sup>, Iolanda Riba-Llena <sup>30</sup>, Marta Ribasés <sup>238</sup>, Jose R Romero <sup>185,48</sup>, Jaume Roquer <sup>239,240</sup>, Anthony G Rudd <sup>241,242</sup>, Antti-Pekka Sarin <sup>243,244</sup>, Ralhan Sarju <sup>199</sup>, Chloe Sarnowski <sup>47,48</sup>, Makoto Sasaki <sup>245</sup>, Claudia L Satizabal <sup>185,48</sup>, Mamoru Satoh <sup>245</sup>, Naveed Sattar <sup>246</sup>, Norie Sawada <sup>206</sup>, Gerli Sibolt <sup>172</sup>, Ásgeir Sigurdsson <sup>247</sup>, Albert Smith <sup>248</sup>, Kenji Sobue <sup>245</sup>, Carolina Soriano-Tárraga <sup>240</sup>, Tara Stanne <sup>249</sup>, O Colin Stine <sup>250</sup>, David J Stott <sup>251</sup>, Konstantin Strauch <sup>229,252</sup>, Takako Takai <sup>203</sup>, Hideo Tanaka <sup>253,254</sup>, Kozo Tanno <sup>245</sup>, Alexander Teumer <sup>255</sup>, Liisa Tomppo <sup>172</sup>, Nuria P Torres-Aguila <sup>31</sup>, Emmanuel Touze <sup>256,257</sup>, Shoichiro Tsugane <sup>206</sup>, Andre G Uitterlinden <sup>258</sup>, Einar M Valdimarsson <sup>259</sup>, Sven J van der Lee <sup>16</sup>, Henry Völzke <sup>255</sup>, Kenji Wakai <sup>253</sup>, David Weir <sup>260</sup>, Stephen R Williams <sup>261</sup>, Charles DA Wolfe <sup>241,242</sup>, Quenna Wong <sup>118</sup>, Huichun Xu <sup>191</sup>, Taiki Yamaji <sup>206</sup>, Dharambir K Sanghera <sup>125,169,170</sup>, Olle Melander <sup>19</sup>, Christina Jern <sup>171</sup>, Daniel Strbian <sup>172,173</sup>, Israel Fernandez-Cadenas <sup>31,30</sup>, W T Longstreth, Jr <sup>174,65</sup>, Arndt Rolfs <sup>175</sup>, Jun Hata <sup>107</sup>, Daniel Woo <sup>82</sup>, Jonathan Rosand <sup>12,13,14</sup>, Guillaume Pare <sup>15</sup>, Jemma C Hopewell <sup>176</sup>, Danish Saleheen <sup>177</sup>, Kari Stefansson <sup>11,178</sup>, Bradford B Worrall <sup>179</sup>, Steven J Kittner <sup>37</sup>, Sudha Seshadri <sup>180,48</sup>, Myriam Fornage <sup>74,181</sup>, Hugh S Markus <sup>3</sup>, Joanna MM Howson <sup>28</sup>, Yoichiro Kamatani <sup>6,182</sup>, Stephanie Debette <sup>4,5</sup>, Martin Dichgans <sup>1,183,184</sup>

1 Institute for Stroke and Dementia Research (ISD), University Hospital, LMU Munich, Munich, Germany

2 Centre for Brain Research, Indian Institute of Science, Bangalore, India

3 Stroke Research Group, Division of Clinical Neurosciences, University of Cambridge, UK

4 INSERM U1219 Bordeaux Population Health Research Center, Bordeaux, France

5 University of Bordeaux, Bordeaux, France

6 Laboratory for Statistical Analysis, RIKEN Center for Integrative Medical Sciences, Yokohama, Japan

7 Department of Statistical Genetics, Osaka University Graduate School of Medicine, Osaka, Japan

8 Laboratory of Statistical Immunology, Immunology Frontier Research Center (WPI-IFReC), Osaka University, Suita, Japan.

9 Department of Neurology, Massachusetts General Hospital, Harvard Medical School, Boston, MA, USA

10 Laboratory of Experimental Cardiology, Division of Heart and Lungs, University Medical Center Utrecht, University of Utrecht, Utrecht, Netherlands

11 deCODE genetics/AMGEN inc, Reykjavik, Iceland

12 Center for Genomic Medicine, Massachusetts General Hospital (MGH), Boston, MA, USA

13 J. Philip Kistler Stroke Research Center, Department of Neurology, MGH, Boston, MA, USA

14 Program in Medical and Population Genetics, Broad Institute, Cambridge, MA, USA

15 Population Health Research Institute, McMaster University, Hamilton, Canada

16 Department of Epidemiology, Erasmus University Medical Center, Rotterdam, Netherlands

17 Department of Radiology and Nuclear Medicine, Erasmus University Medical Center, Rotterdam, Netherlands

18 Department of Medicine and Clinical Science, Graduate School of Medical Sciences, Kyushu University, Fukuoka, Japan

19 Department of Clinical Sciences, Lund University, Malmö, Sweden

20 Univ. Lille, Inserm, Institut Pasteur de Lille, LabEx DISTALZ-UMR1167, Risk factors and molecular determinants of aging-related diseases, F-59000 Lille, France

21 Centre Hosp. Univ Lille, Epidemiology and Public Health Department, F-59000 Lille, France

22 AA Martinos Center for Biomedical Imaging, Department of Radiology, Massachusetts General Hospital, Harvard Medical School, Boston, MA, USA

23 Cardiovascular Health Research Unit, Departments of Biostatistics and Medicine, University of Washington, Seattle, WA, USA

24 Division of Neurology, Faculty of Medicine, Brain Research Center, University of British Columbia, Vancouver, Canada

25 School of Life Science, University of Lincoln, Lincoln, UK

26 Department of Cerebrovascular Diseases, Fondazione IRCCS Istituto Neurologico "Carlo Besta", Milano, Italy

27 Department of Neurology, Mayo Clinic Rochester, Rochester, MN, USA

28 MRC/BHF Cardiovascular Epidemiology Unit, Department of Public Health and Primary Care, University of Cambridge, Cambridge, UK

29 The National Institute for Health Research Blood and Transplant Research Unit in Donor Health and Genomics, University of Cambridge, UK

30 Neurovascular Research Laboratory, Vall d'Hebron Institut of Research, Neurology and Medicine Departments - Universitat Autònoma de Barcelona, Vall d'Hebrón Hospital, Barcelona, Spain

31 Stroke Pharmacogenomics and Genetics, Fundacio Docència i Recerca MutuaTerrassa, Terrassa, Spain

32 Children's Research Institute, Children's National Medical Center, Washington, DC, USA

33 Center for Translational Science, George Washington University, Washington, DC, USA

34 Division of Preventive Medicine, Brigham and Women's Hospital, Boston, MA, USA

35 Harvard Medical School, Boston, MA, USA

36 Center for Public Health Genomics, Department of Public Health Sciences, University of Virginia, Charlottesville, VA, USA

37 Department of Neurology, University of Maryland School of Medicine and Baltimore VAMC, Baltimore, MD, USA

38 Departments of Medicine, Pediatrics and Population Health Science, University of Mississippi Medical Center, Jackson, MS, USA

39 Institute of Cardiovascular Research, Royal Holloway University of London, UK & Ashford and St Peters Hospital, Surrey UK

40 Department of Psychiatry, The Hope Center Program on Protein Aggregation and Neurodegeneration (HPAN), Washington University, School of Medicine, St. Louis, MO, USA

41 Department of Developmental Biology, Washington University School of Medicine, St. Louis, MO, USA

42 NIHR Blood and Transplant Research Unit in Donor Health and Genomics, Department of Public Health and Primary Care, University of Cambridge, Cambridge, UK

43 Wellcome Trust Sanger Institute, Wellcome Trust Genome Campus, Hinxton, Cambridge, UK

44 British Heart Foundation, Cambridge Centre of Excellence, Department of Medicine, University of Cambridge, Cambridge, UK

45 Department of Medical Genetics, University Medical Center Utrecht, Utrecht, Netherlands

46 Department of Epidemiology, Julius Center for Health Sciences and Primary Care, University Medical Center Utrecht, Utrecht, Netherlands

47 Boston University School of Public Health, Boston, MA, USA

48 Framingham Heart Study, Framingham, MA, USA

49 Department of Immunology, Genetics and Pathology and Science for Life Laboratory, Uppsala University, Uppsala, Sweden

50 Department of Genetics, University of North Carolina, Chapel Hill, NC, USA

51 Department of Neurology and Stroke Center, Basel University Hospital, Switzerland

52 Neurorehabilitation Unit, University and University Center for Medicine of Aging and Rehabilitation Basel, Felix Platter Hospital, Basel, Switzerland

53 Department of Neurology, Yale University School of Medicine, New Haven, CT, USA

54 Program in Medical and Population Genetics, The Broad Institute of Harvard and MIT, Cambridge, MA, USA

55 Department of Neurology, Johns Hopkins University School of Medicine, Baltimore, MD, USA

56 Neuroscience Institute, SF Medical Center, Trenton, NJ, USA

57 Icelandic Heart Association Research Institute, Kopavogur, Iceland

58 University of Iceland, Faculty of Medicine, Reykjavik, Iceland

59 Department of Medical Sciences, Molecular Epidemiology and Science for Life Laboratory, Uppsala University, Uppsala, Sweden

60 Division of Public Health Sciences, Fred Hutchinson Cancer Research Center, Seattle, WA, USA

61 Laboratory of Epidemiology and Population Science, National Institute on Aging, National Institutes of Health, Bethesda, MD, USA

62 Department of Neurology, Leeds General Infirmary, Leeds Teaching Hospitals NHS Trust, Leeds, UK

63 National Institute for Health and Welfare, Helsinki, Finland

64 FIMM - Institute for Molecular Medicine Finland, Helsinki, Finland

65 Department of Epidemiology, University of Washington, Seattle, WA, USA

66 Public Health Stream, Hunter Medical Research Institute, New Lambton, Australia

67 Faculty of Health and Medicine, University of Newcastle, Newcastle, Australia

68 School of Public Health, University of Alabama at Birmingham, Birmingham, AL, USA

69 Department of Biostatistical Sciences, Wake Forest School of Medicine, Winston-Salem, NC, USA

70 Aflac Cancer and Blood Disorder Center, Department of Pediatrics, Emory University School of Medicine, Atlanta, GA, USA

71 Department of Medicine, Division of Cardiovascular Medicine, Stanford University School of Medicine, CA, USA

72 Department of Medical Sciences, Molecular Epidemiology and Science for Life Laboratory, Uppsala University, Uppsala, Sweden

73 Epidemiology, School of Public Health, University of Alabama at Birmingham, USA

74 Brown Foundation Institute of Molecular Medicine, University of Texas Health Science Center at Houston, Houston, TX, USA

75 Neurovascular Research Group (NEUVAS), Neurology Department, Institut Hospital del Mar d'Investigació Mèdica, Universitat Autònoma de Barcelona, Barcelona, Spain

76 Department of Pharmacotherapy and Translational Research and Center for Pharmacogenomics, University of Florida, College of Pharmacy, Gainesville, FL, USA

77 Division of Cardiovascular Medicine, College of Medicine, University of Florida, Gainesville, FL, USA

78 Department of Cardiology, Leiden University Medical Center, Leiden, the Netherlands

79 Program in Bioinformatics and Integrative Genomics, Harvard Medical School, Boston, MA, USA

80 Department of Biology, East Carolina University, Greenville, NC, USA

81 Center for Health Disparities, East Carolina University, Greenville, NC, USA

82 University of Cincinnati College of Medicine, Cincinnati, OH, USA

83 RIKEN Center for Integrative Medical Sciences, Yokohama, Japan

84 Department of Medicine, University of Colorado Denver, Anschutz Medical Campus, Aurora, CO, USA  
85 Center for Public Health Genomics and Department of Biostatistical Sciences, Wake Forest School of Medicine, Winston-Salem, NC, USA  
86 MRC Epidemiology Unit, University of Cambridge School of Clinical Medicine, Institute of Metabolic Science, Cambridge Biomedical Campus, Cambridge, UK  
87 Intramural Research Program, National Institute on Aging, National Institutes of Health, Bethesda, MD, USA  
88 Department of Neurology, Radiology, and Biomedical Engineering, Washington University School of Medicine, St. Louis, MO, USA  
89 KU Leuven – University of Leuven, Department of Neurosciences, Experimental Neurology, Leuven, Belgium  
90 VIB Center for Brain & Disease Research, University Hospitals Leuven, Department of Neurology, Leuven, Belgium  
91 Univ.-Lille, INSERM U 1171. CHU Lille. Lille, France  
92 Department of Medical and Molecular Genetics, King's College London, London, UK  
93 SGDP Centre, Institute of Psychiatry, Psychology & Neuroscience, King's College London, London, UK  
94 Northern Institute for Cancer Research, Paul O'Gorman Building, Newcastle University, Newcastle, UK  
95 Department of Clinical Sciences Lund, Neurology, Lund University, Lund, Sweden  
96 Department of Neurology and Rehabilitation Medicine, Skåne University Hospital, Lund, Sweden  
97 Bioinformatics Core Facility, University of Gothenburg, Gothenburg, Sweden  
98 Department of Medical Epidemiology and Biostatistics, Karolinska Institutet, Stockholm, Sweden  
99 University of Technology Sydney, Faculty of Health, Ultimo, Australia  
100 Department of Medicine, University of Maryland School of Medicine, MD, USA  
101 Department of Neurology, Mayo Clinic, Jacksonville, FL, USA  
102 Geriatrics Research and Education Clinical Center, Baltimore Veterans Administration Medical Center, Baltimore, MD, USA  
103 Division of Geriatrics, School of Medicine, University of Mississippi Medical Center, Jackson, MS, USA  
104 Memory Impairment and Neurodegenerative Dementia Center, University of Mississippi Medical Center, Jackson, MS, USA  
105 Laboratory of Neurogenetics, National Institute on Aging, National institutes of Health, Bethesda, MD, USA  
106 Data Tecnica International, Glen Echo MD, USA  
107 Department of Epidemiology and Public Health, Graduate School of Medical Sciences, Kyushu University, Fukuoka, Japan  
108 Clinical Research Facility, Department of Medicine, NUI Galway, Galway, Ireland  
109 Cardiovascular Health Research Unit, Department of Medicine, University of Washington, Seattle, WA, USA  
110 Department of Epidemiology, University of Washington, Seattle, WA  
111 Department of Health Services, University of Washington, Seattle, WA, USA  
112 Kaiser Permanente Washington Health Research Institute, Seattle, WA, USA  
113 Brain Center Rudolf Magnus, Department of Neurology, University Medical Center Utrecht, Utrecht, The Netherlands  
114 Usher Institute of Population Health Sciences and Informatics, University of Edinburgh, Edinburgh, UK  
115 Centre for Clinical Brain Sciences, University of Edinburgh, Edinburgh, UK  
116 Fred Hutchinson Cancer Research Center, University of Washington, Seattle, WA, USA  
117 Department of Medicine, Brigham and Women's Hospital, Boston, MA, USA  
118 Department of Biostatistics, University of Washington, Seattle, WA, USA  
119 Nuffield Department of Clinical Neurosciences, University of Oxford, UK  
120 Institute for Translational Genomics and Population Sciences, Los Angeles Biomedical Research Institute at Harbor-UCLA Medical Center, Torrance, CA, USA  
121 Division of Genomic Outcomes, Department of Pediatrics, Harbor-UCLA Medical Center, Torrance, CA, USA  
122 Department of Neurology, Miller School of Medicine, University of Miami, Miami, FL, USA  
123 Department of Allergy and Rheumatology, Graduate School of Medicine, the University of Tokyo, Tokyo, Japan  
124 Center for Public Health Genomics, University of Virginia, Charlottesville, VA, USA  
125 Department of Pediatrics, College of Medicine, University of Oklahoma Health Sciences Center, Oklahoma City, OK, USA  
126 Department of Neurology, Medical University of Graz, Graz, Austria  
127 University Medicine Greifswald, Institute for Community Medicine, SHIP-KEF, Greifswald, Germany  
128 University Medicine Greifswald, Department of Neurology, Greifswald, Germany  
129 Department of Neurology, Jagiellonian University, Krakow, Poland

130 Department of Neurology, Justus Liebig University, Giessen, Germany  
131 Department of Clinical Neurosciences/Neurology, Institute of Neuroscience and Physiology, Sahlgrenska Academy at University of Gothenburg, Gothenburg, Sweden  
132 Sahlgrenska University Hospital, Gothenburg, Sweden  
133 Stroke Division, Florey Institute of Neuroscience and Mental Health, University of Melbourne, Heidelberg, Australia  
134 Austin Health, Department of Neurology, Heidelberg, Australia  
135 Department of Internal Medicine, Section Gerontology and Geriatrics, Leiden University Medical Center, Leiden, the Netherlands  
136 INSERM U1219, Bordeaux, France  
137 Department of Public Health, Bordeaux University Hospital, Bordeaux, France  
138 Genetic Epidemiology Unit, Department of Epidemiology, Erasmus University Medical Center Rotterdam, Netherlands  
139 Center for Medical Systems Biology, Leiden, Netherlands  
140 School of Medicine, Dentistry and Nursing at the University of Glasgow, Glasgow, UK  
141 Department of Epidemiology and Population Health, Albert Einstein College of Medicine, NY, USA  
142 Department of Physiology and Biophysics, University of Mississippi Medical Center, Jackson, MS, USA  
143 A full list of members and affiliations appears in the Supplementary Note  
144 Department of Human Genetics, McGill University, Montreal, Canada  
145 Department of Pathophysiology, Institute of Biomedicine and Translation Medicine, University of Tartu, Tartu, Estonia  
146 Department of Cardiac Surgery, Tartu University Hospital, Tartu, Estonia  
147 Clinical Gene Networks AB, Stockholm, Sweden  
148 Department of Genetics and Genomic Sciences, The Icahn Institute for Genomics and Multiscale Biology Icahn School of Medicine at Mount Sinai, New York, NY, USA  
149 Department of Pathophysiology, Institute of Biomedicine and Translation Medicine, University of Tartu, Biomeedikum, Tartu, Estonia  
150 Integrated Cardio Metabolic Centre, Department of Medicine, Karolinska Institutet, Karolinska Universitetssjukhuset, Huddinge, Sweden.  
151 Clinical Gene Networks AB, Stockholm, Sweden  
152 Sorbonne Universités, UPMC Univ. Paris 06, INSERM, UMR\_S 1166, Team Genomics & Pathophysiology of Cardiovascular Diseases, Paris, France  
153 ICAN Institute for Cardiometabolism and Nutrition, Paris, France  
154 Department of Biomedical Engineering, University of Virginia, Charlottesville, VA, USA  
155 Group Health Research Institute, Group Health Cooperative, Seattle, WA, USA  
156 Seattle Epidemiologic Research and Information Center, VA Office of Research and Development, Seattle, WA, USA  
157 Cardiovascular Research Center, Massachusetts General Hospital, Boston, MA, USA  
158 Department of Medical Research, Bærum Hospital, Vestre Viken Hospital Trust, Gjetlum, Norway  
159 Saw Swee Hock School of Public Health, National University of Singapore and National University Health System, Singapore  
160 National Heart and Lung Institute, Imperial College London, London, UK  
161 Department of Gene Diagnostics and Therapeutics, Research Institute, National Center for Global Health and Medicine, Tokyo, Japan  
162 Department of Epidemiology, Tulane University School of Public Health and Tropical Medicine, New Orleans, LA, USA  
163 Department of Cardiology, University Medical Center Groningen, University of Groningen, Netherlands  
164 MRC-PHE Centre for Environment and Health, School of Public Health, Department of Epidemiology and Biostatistics, Imperial College London, London, UK  
165 Department of Epidemiology and Biostatistics, Imperial College London, London, UK  
166 Department of Cardiology, Ealing Hospital NHS Trust, Southall, UK  
167 National Heart, Lung and Blood Research Institute, Division of Intramural Research, Population Sciences Branch, Framingham, MA, USA  
168 A full list of members and affiliations appears at the end of the manuscript  
169 Department of Pharmaceutical Sciences, College of Pharmacy, University of Oklahoma Health Sciences Center, Oklahoma City, OK, USA  
170 Oklahoma Center for Neuroscience, Oklahoma City, OK, USA

171 Department of Pathology and Genetics, Institute of Biomedicine, The Sahlgrenska Academy at University of Gothenburg, Gothenburg, Sweden

172 Department of Neurology, Helsinki University Hospital, Helsinki, Finland

173 Clinical Neurosciences, Neurology, University of Helsinki, Helsinki, Finland

174 Department of Neurology, University of Washington, Seattle, WA, USA

175 Albrecht Kossel Institute, University Clinic of Rostock, Rostock, Germany

176 Clinical Trial Service Unit and Epidemiological Studies Unit, Nuffield Department of Population Health, University of Oxford, Oxford, UK

177 Department of Genetics, Perelman School of Medicine, University of Pennsylvania, PA, USA

178 Faculty of Medicine, University of Iceland, Reykjavik, Iceland

179 Departments of Neurology and Public Health Sciences, University of Virginia School of Medicine, Charlottesville, VA, USA

180 Department of Neurology, Boston University School of Medicine, Boston, MA, USA

181 Human Genetics Center, University of Texas Health Science Center at Houston, Houston, TX, USA

182 Center for Genomic Medicine, Kyoto University Graduate School of Medicine, Kyoto, Japan

183 Munich Cluster for Systems Neurology (SyNergy), Munich, Germany

184 German Center for Neurodegenerative Diseases (DZNE), Munich, Germany

185 Boston University School of Medicine, Boston, MA, USA

186 University of Kentucky College of Public Health, Lexington, KY, USA

187 University of Newcastle and Hunter Medical Research Institute, New Lambton, Australia

188 Univ. Montpellier, Inserm, U1061, Montpellier, France

189 Centre for Research in Environmental Epidemiology, Barcelona, Spain

190 Department of Neurology, Università degli Studi di Perugia, Umbria, Italy

191 Department of Medicine, University of Maryland School of Medicine, Baltimore, MD, USA

192 Broad Institute, Cambridge, MA, USA

193 Univ. Bordeaux, Inserm, Bordeaux Population Health Research Center, UMR 1219, Bordeaux, France

194 Bordeaux University Hospital, Department of Neurology, Memory Clinic, Bordeaux, France

195 Neurovascular Research Laboratory. Vall d'Hebron Institut of Research, Neurology and Medicine Departments - Universitat Autònoma de Barcelona. Vall d'Hebrón Hospital, Barcelona, Spain

196 University Medicine Greifswald, Department of Internal Medicine B, Greifswald, Germany

197 DZHK, Greifswald, Germany

198 Robertson Center for Biostatistics, University of Glasgow, Glasgow, UK

199 Hero DMC Heart Institute, Dayanand Medical College & Hospital, Ludhiana, India

200 Atherosclerosis Research Unit, Department of Medicine Solna, Karolinska Institutet, Stockholm, Sweden

201 Karolinska Institutet, Stockholm, Sweden

202 Division of Emergency Medicine, and Department of Neurology, Washington University School of Medicine, St. Louis, MO, USA

203 Tohoku Medical Megabank Organization, Sendai, Japan

204 Department of Psychiatry, Washington University School of Medicine, St. Louis, MO, USA

205 Department of Public Health and Caring Sciences / Geriatrics, Uppsala University, Uppsala, Sweden

206 Epidemiology and Prevention Group, Center for Public Health Sciences, National Cancer Center, Tokyo, Japan

207 Department of Internal Medicine and the Center for Clinical and Translational Science, The Ohio State University, Columbus, OH, USA

208 Institute of Neuroscience and Physiology, the Sahlgrenska Academy at University of Gothenburg, Goteborg, Sweden

209 Department of Basic and Clinical Neurosciences, King's College London, London, UK

210 Department of Health Care Administration and Management, Graduate School of Medical Sciences, Kyushu University, Japan

211 Department of Medicine and Clinical Science, Graduate School of Medical Sciences, Kyushu University, Japan

212 Landspítali National University Hospital, Departments of Neurology & Radiology, Reykjavik, Iceland

213 Department of Neurology, Heidelberg University Hospital, Germany

214 Department of Neurology, Erasmus University Medical Center

215 Hospital Universitari Mutua Terrassa, Terrassa (Barcelona), Spain

216 Albert Einstein College of Medicine, Montefiore Medical Center, New York, NY, USA

217 John Hunter Hospital, Hunter Medical Research Institute and University of Newcastle, Newcastle, NSW, Australia



218 Centre for Prevention of Stroke and Dementia, Nuffield Department of Clinical Neurosciences, University of Oxford, UK

219 Department of Medical Sciences, Uppsala University, Uppsala, Sweden

220 Genetic and Genomic Epidemiology Unit, Wellcome Trust Centre for Human Genetics, University of Oxford, Oxford, UK

221 The Wellcome Trust Centre for Human Genetics, Oxford, UK

222 Beth Israel Deaconess Medical Center, Boston, MA, USA

223 Wake Forest School of Medicine, Wake Forest, NC, USA

224 Department of Neurology, University of Pittsburgh, Pittsburgh, PA, USA

225 BioBank Japan, Laboratory of Clinical Sequencing, Department of Computational biology and medical Sciences, Graduate school of Frontier Sciences, The University of Tokyo, Tokyo, Japan

226 Neurovascular Research Laboratory, Vall d'Hebron Institut of Research, Neurology and Medicine Departments - Universitat Autònoma de Barcelona. Vall d'Hebrón Hospital, Barcelona, Spain

227 Department of Biostatistics, University of Liverpool, Liverpool, UK

228 Wellcome Trust Centre for Human Genetics, University of Oxford, Oxford, UK

229 Institute of Genetic Epidemiology, Helmholtz Zentrum München - German Research Center for Environmental Health, Neuherberg, Germany

230 Department of Medicine I, Ludwig-Maximilians-Universität, Munich, Germany

231 DZHK (German Centre for Cardiovascular Research), partner site Munich Heart Alliance, Munich, Germany

232 Department of Cerebrovascular Diseases, Fondazione IRCCS Istituto Neurologico "Carlo Besta", Milano, Italy

233 Karolinska Institutet, MEB, Stockholm, Sweden

234 University of Tartu, Estonian Genome Center, Tartu, Estonia, Tartu, Estonia

235 Department of Clinical and Experimental Sciences, Neurology Clinic, University of Brescia, Italy

236 Translational Genomics Unit, Department of Oncology, IRCCS Istituto di Ricerche Farmacologiche Mario Negri, Milano, Italy

237 Department of Genetics, Microbiology and Statistics, University of Barcelona, Barcelona, Spain

238 Psychiatric Genetics Unit, Group of Psychiatry, Mental Health and Addictions, Vall d'Hebron Research Institute (VHIR), Universitat Autònoma de Barcelona, Biomedical Network Research Centre on Mental Health (CIBERSAM), Barcelona, Spain

239 Department of Neurology, IMIM-Hospital del Mar, and Universitat Autònoma de Barcelona, Spain

240 IMIM (Hospital del Mar Medical Research Institute), Barcelona, Spain

241 National Institute for Health Research Comprehensive Biomedical Research Centre, Guy's & St. Thomas' NHS Foundation Trust and King's College London, London, UK

242 Division of Health and Social Care Research, King's College London, London, UK

243 FIMM-Institute for Molecular Medicine Finland, Helsinki, Finland

244 THL-National Institute for Health and Welfare, Helsinki, Finland

245 Iwate Tohoku Medical Megabank Organization, Iwate Medical University, Iwate, Japan

246 BHF Glasgow Cardiovascular Research Centre, Faculty of Medicine, Glasgow, UK

247 deCODE Genetics/Amgen, Inc., Reykjavik, Iceland

248 Icelandic Heart Association, Reykjavik, Iceland

249 Institute of Biomedicine, the Sahlgrenska Academy at University of Gothenburg, Goteborg, Sweden

250 Department of Epidemiology, University of Maryland School of Medicine, Baltimore, MD, USA

251 Institute of Cardiovascular and Medical Sciences, Faculty of Medicine, University of Glasgow, Glasgow, UK

252 Chair of Genetic Epidemiology, IBE, Faculty of Medicine, LMU Munich, Germany

253 Division of Epidemiology and Prevention, Aichi Cancer Center Research Institute, Nagoya, Japan

254 Department of Epidemiology, Nagoya University Graduate School of Medicine, Nagoya, Japan

255 University Medicine Greifswald, Institute for Community Medicine, SHIP-KEF, Greifswald, Germany

256 Department of Neurology, Caen University Hospital, Caen, France

257 University of Caen Normandy, Caen, France

258 Department of Internal Medicine, Erasmus University Medical Center, Rotterdam, Netherlands

259 Landspítali University Hospital, Reykjavik, Iceland

260 Survey Research Center, University of Michigan, Ann Arbor, MI, USA

261 University of Virginia Department of Neurology, Charlottesville, VA, USA

**Author list for Coronary ARtery Disease Genome Wide Replication and Meta-analysis (CARDIoGRAM) on paper: Association analyses based on false discovery rate implicate new loci for coronary artery disease. Nat Genet 49, 1385-1391 (2017)**

Christopher P Nelson<sup>1,2,60</sup>, Anuj Goel<sup>3,4,60</sup>, Adam S Butterworth<sup>5,6,60</sup>, Stavroula Kanoni<sup>7,8,60</sup>, Tom R Webb<sup>1,2</sup>, Eirini Marouli<sup>7,8</sup>, Lingyao Zeng<sup>9</sup>, Ioanna Ntalla<sup>7,8</sup>, Florence Y Lai<sup>1,2</sup>, Jemma C Hopewell<sup>10</sup>, Olga Giannakopoulou<sup>7,8</sup>, Tao Jiang<sup>5</sup>, Stephen E Hamby<sup>1,2</sup>, Emanuele Di Angelantonio<sup>5,6</sup>, Themistocles L Assimes<sup>11</sup>, Erwin P Bottinger<sup>12</sup>, John C Chambers<sup>13-15</sup>, Robert Clarke<sup>10</sup>, Colin N A Palmer<sup>16,17</sup>, Richard M Cubbon<sup>18</sup>, Patrick Ellinor<sup>19</sup>, Raili Ermel<sup>20</sup>, Evangelos Evangelou<sup>13,21</sup>, Paul W Franks<sup>22-24</sup>, Christopher Grace<sup>3,4</sup>, Dongfeng Gu<sup>25</sup>, Aaron D Hingorani<sup>26</sup>, Joanna M M Howson<sup>5</sup>, Erik Ingelsson<sup>27</sup>, Adnan Kastrati<sup>9</sup>, Thorsten Kessler<sup>9</sup>, Theodosios Kyriakou<sup>3,4</sup>, Terho Lehtimäki<sup>28</sup>, Xiangfeng Lu<sup>27</sup>, Yingchang Lu<sup>12,29</sup>, Winfried März<sup>30-32</sup>, Ruth McPherson<sup>33</sup>, Andres Metspalu<sup>34</sup>, Mar Pujades-Rodriguez<sup>35</sup>, Arno Ruusalepp<sup>20,36</sup>, Eric E Schadt<sup>37</sup>, Amand F Schmidt<sup>38</sup>, Michael J Sweeting<sup>5</sup>, Pierre A Zalloua<sup>39,40</sup>, Kamal Al Ghalayini<sup>41</sup>, Bernard D Keavney<sup>42,43</sup>, Jaspal S Kooner<sup>14,15,44</sup>, Ruth J F Loos<sup>12,45</sup>, Riyaz S Patel<sup>46,47</sup>, Martin K Rutter<sup>48,49</sup>, Maciej Tomaszewski<sup>43,50</sup>, Ioanna Tzoulaki<sup>13,21</sup>, Eleftheria Zeggini<sup>51</sup>, Jeanette Erdmann<sup>52-54</sup>, George Dedoussis<sup>55</sup>, Johan L M Björkegren<sup>36,37,56</sup>, EPICCVD Consortium<sup>57</sup>, CARDIoGRAMplusC4D<sup>57</sup>, The UK Biobank CardioMetabolic Consortium CHD working group<sup>57</sup>, Heribert Schunkert<sup>9,60</sup>, Martin Farrall<sup>3,4,60</sup>, John Danesh<sup>5,6,58,60</sup>, Nilesh J Samani<sup>1,2,60</sup>, Hugh Watkins<sup>3,4,60</sup> & Panos Deloukas<sup>7,8,59,60</sup>

**Affiliations at the time the manuscript was published:**

1Department of Cardiovascular Sciences, University of Leicester, Leicester, UK. 2National Institute for Health Research Leicester Biomedical Research Centre, Leicester, UK. 3Division of Cardiovascular Medicine, Radcliffe Department of Medicine, University of Oxford, Oxford, UK. 4Wellcome Trust Centre for Human Genetics, University of Oxford, Oxford, UK. 5MRC/BHF Cardiovascular Epidemiology Unit, Department of Public Health and Primary Care, University of Cambridge, Cambridge, UK. 6NIHR Blood and Transplant Research Unit in Donor Health and Genomics, Department of Public Health and Primary Care, University of Cambridge, Cambridge, UK. 7William Harvey Research Institute, Barts & the London Medical School, Queen Mary University of London, London, UK. 8Centre for Genomic Health, Queen Mary University of London, London, UK. 9German Heart Center Munich, Clinic at Technische Universität München and Deutsches Zentrum für Herz- und Kreislauferkrankungen (DZHK), partner site Munich Heart Alliance, Munich, Germany. 10CTSU, Nuffield Department of Population Health, University of Oxford, Oxford, UK. 11Department of Medicine, Stanford University School of Medicine, Stanford, California, USA. 12Charles Bronfman Institute for Personalized Medicine, Icahn School of Medicine at Mount Sinai, New York, New York, USA. 13Department of Epidemiology and Biostatistics, Imperial College London, London, UK. 14Department of Cardiology, Ealing Hospital, London North West Healthcare NHS Trust, Southall, UK. 15Imperial College Healthcare NHS Trust, London, UK. 16Molecular and Clinical Medicine, Biomedical Research Institute, University of Dundee, Ninewells Hospital, Dundee, UK. 17 Pharmacogenomics Centre, Biomedical Research Institute, University of Dundee, Ninewells Hospital, Dundee, UK. 18 Leeds Institute of Cardiovascular and Metabolic Medicine, University of Leeds, Leeds, UK. 19Cardiac Arrhythmia Service and Cardiovascular Research Center, Broad Institute of Harvard and Massachusetts Institute of Technology, Boston, Massachusetts, USA. 20Department of Cardiac Surgery, Tartu University Hospital, Tartu, Nature Genetics: doi:10.1038/ng.3913 Estonia. 21Department of Hygiene and Epidemiology, University of Ioannina Medical School, Ioannina, Greece. 22Department of Clinical Sciences, Genetic & Molecular Epidemiology Unit, Lund University Diabetes Center, Skåne University Hospital, Lund University, Malmö, Sweden. 23Department of Nutrition, Harvard T.H. Chan School of Public Health, Harvard University, Boston, Massachusetts, USA. 24Department of Public Health and Clinical Medicine, Unit of Medicine, Umeå University, Umeå, Sweden. 25State Key Laboratory of Cardiovascular Disease, Fuwai Hospital, National Center of Cardiovascular Diseases, Chinese Academy of Medical Sciences and Peking Union Medical College, Beijing, China. 26University College London, London, UK. 27Department of Medicine, Division of Cardiovascular Medicine, Stanford University School of Medicine, Stanford, California, USA. 28Department of Clinical Chemistry, Fimlab Laboratories and Faculty of Medicine and Life Sciences, University of Tampere, Tampere, Finland. 29Division of Epidemiology, Department of Medicine, Vanderbilt-Ingram Cancer Center, Vanderbilt Epidemiology Center, Vanderbilt University School of Medicine, Nashville, Tennessee, USA. 30Clinical Institute of Medical and Chemical Laboratory Diagnostics, Medical University of Graz, Graz, Austria. 31Medical Clinic V (Nephrology, Rheumatology, Hypertensiology, Endocrinology, Diabetology), Medical Faculty Mannheim, University of Heidelberg, Mannheim, Germany. 32Academy, Synlab Holding Deutschland GmbH, Mannheim, Germany. 33Ruddy Canadian Cardiovascular Genetics Centre, University of Ottawa Heart Institute, Ottawa, Ontario, Canada. 34Estonian Genome Center, University of Tartu, Tartu, Estonia. 35Leeds Institute of Biomedical and Clinical Sciences, University of Leeds, Leeds, UK. 36Clinical Gene Networks AB, Stockholm, Sweden. 37Department of Genetics and Genomic Sciences, Icahn Institute for Genomics and Multiscale Biology, Icahn School of Medicine at Mount Sinai, New York, New York, USA. 38Institute of Cardiovascular Science, UCL, London, UK. 39 Lebanese American University, School of Medicine, Beirut, Lebanon. 40Harvard T.H. Chan School of Public Health, Boston, Massachusetts, USA. 41Department of Medicine, King Abdulaziz University, Jeddah, Saudi Arabia. 42Division of Cardiovascular Sciences, Faculty of Biology, Medicine and Health, University of Manchester, Manchester, UK. 43Central Manchester University Hospitals NHS Foundation Trust, Manchester Academic Health Science Centre, Manchester, UK. 44Cardiovascular Science, National Heart and Lung Institute, Imperial College London, London, UK. 45Mindich Child Health Development Institute, Icahn School of Medicine at Mount Sinai, New York, New York, USA. 46Farr Institute of Health Informatics, UCL, London, UK. 47Bart's Heart Centre, St Bartholomew's Hospital, London, UK. 48Division of Diabetes, Endocrinology and Gastroenterology, Faculty of Biology, Medicine and Health, University of Manchester, Manchester, UK. 49Manchester Diabetes Centre, Central Manchester University Hospitals NHS Foundation Trust, Manchester Academic Health Science Centre, Manchester, UK. 50Division of Medicine, Central Manchester NHS Foundation Trust, Manchester Academic Health Science Centre, Manchester, UK. 51Wellcome Trust Sanger Institute, Hinxton, UK. 52Institute for Cardiogenetics, University of Lübeck, Lübeck, Germany. 53DZHK (German Research Centre for Cardiovascular Research), partner site Hamburg/Lübeck/Kiel, Lübeck, Germany. 54University Heart Center Lübeck, Lübeck, Germany. 55Department of Nutrition-Dietetics, Harokopio University, Athens, Greece. 56 Integrated Cardio Metabolic Centre, Department of Medicine, Karolinska Institutet,

Karolinska Universitetssjukhuset, Huddinge, Sweden. 57A list of members and affiliations appears in the Supplementary Note. 58Wellcome Trust Sanger Institute, Wellcome Trust Genome Campus, Hinxton, UK. 59Princess Al-Jawhara Al-Brahim Centre of Excellence in Research of Hereditary Disorders (PACER-HD), Nature Genetics: doi:10.1038/ng.3913 King Abdulaziz University, Jeddah, Saudi Arabia. 60These authors contributed equally to this work.

**Author list for International Consortium of Blood Pressure-Genome Wide Association Studies (ICBP) on paper: Genetic analysis of over 1 million people identifies 535 new loci associated with blood pressure traits. Nat Genet 50, 1412-1425 (2018).**

Evangelos Evangelou 1 2, Helen R Warren 3 4, David Mosen-Ansorena 1, Borbala Mifsud 3, Raha Pazoki 1, He Gao 1 5, Georgios Ntritsos 2, Niki Dimou 2, Claudia P Cabrera 3 4, Ibrahim Karaman 1, Fu Liang Ng 3, Marina Evangelou 1 6, Katarzyna Witkowska 3, Evan Tzanos 3, Jacklyn N Hellwege 7, Ayush Giri 8, Digna R Velez Edwards 8, Yan V Sun 9 10, Kelly Cho 11 12, J Michael Gaziano 11 12, Peter W F Wilson 13, Philip S Tsao 14, Csaba P Kovesdy 15, Tonu Esko 16 17, Reedik Mägi 16, Lili Milani 16, Peter Almgren 18, Thibaud Boutin 19, Stéphanie Debette 20 21, Jun Ding 22, Franco Giulianini 23, Elizabeth G Holliday 24, Anne U Jackson 25, Ruifang Li-Gao 26, Wei-Yu Lin 27, Jian'an Luan 28, Massimo Mangino 29 30, Christopher Oldmeadow 24, Bram Peter Prins 31, Yong Qian 22, Muralidharan Sargurupremraj 21, Nabi Shah 32 33, Praveen Surendran 27, Sébastien Thériault 34 35, Nick Verweij 17 36 37, Sara M Willems 28, Jing-Hua Zhao 28, Philippe Amouyel 38, John Connell 39, Renée de Mutsert 26, Alex S F Doney 32, Martin Farrall 40 41, Cristina Menni 29, Andrew D Morris 42, Raymond Noordam 43, Guillaume Paré 34, Neil R Poulter 44, Denis C Shields 45, Alice Stanton 46, Simon Thom 47, Gonçalo Abecasis 48, Najaf Amin 49, Dan E Arking 50, Kristin L Ayers 51 52, Caterina M Barbieri 53, Chiara Batini 54, Joshua C Bis 55, Tineka Blake 54, Murielle Bochud 56, Michael Boehnke 25, Eric Boerwinkle 57, Dorret I Boomsma 58, Erwin P Bottinger 59, Peter S Braund 60 61, Marco Brumat 62, Archie Campbell 63 64, Harry Campbell 65, Aravinda Chakravarti 50, John C Chambers 1 5 66 67 68, Ganesh Chauhan 69, Marina Ciullo 70 71, Massimiliano Cocca 72, Francis Collins 73, Heather J Cordell 51, Gail Davies 74 75, Martin H de Borst 76, Eco J de Geus 58, Ian J Deary 74 75, Joris Deelen 77, Fabiola Del Greco M 78, Cumhur Yusuf Demirkale 79, Marcus Dörr 80 81, Georg B Ehret 50 82, Roberto Elosua 83 84, Stefan Enroth 85, A Mesut Erzurumluoglu 54, Teresa Ferreira 86 87, Mattias Frånberg 88 89 90, Oscar H Franco 91, Ilaria Gandin 62, Paolo Gasparini 62 72, Vilmantas Giedraitis 92, Christian Gieger 93 94 95, Giorgia Grotto 62 72, Anuj Goel 40 41, Alan J Gow 74 96, Vilmundur Gudnason 97 98, Xiuqing Guo 99, Ulf Gyllenstein 85, Anders Hamsten 88 89, Tamara B Harris 100, Sarah E Harris 63 74, Catharina A Hartman 101, Aki S Havulinna 102 103, Andrew A Hicks 78, Edith Hofer 104 105, Albert Hofman 91 106, Jouke-Jan Hottenga 58, Jennifer E Huffman 19 107 108, Shih-Jen Hwang 107 108, Erik Ingelsson 109 110, Alan James 111 112, Rick Jansen 113, Marjo-Riitta Jarvelin 1 5 114 115 116, Roby Joehanes 107 117, Åsa Johansson 85, Andrew D Johnson 107 118, Peter K Joshi 65, Pekka Jousilahti 102, J Wouter Jukema 119, Antti Julia 102, Mika Kähönen 120 121, Sekar Kathiresan 17 36 122, Bernard D Keavney 123 124, Kay-Tee Khaw 125, Paul Knekt 102, Joanne Knight 126, Ivana Kolcic 127, Jaspal S Kooner 5 67 68 128, Seppo Koskinen 102, Kati Kristiansson 102, Zoltan Kutalik 56 129, Maris Laan 130, Marty Larson 107, Lenore J Launer 100, Benjamin Lehne 1, Terho Lehtimäki 131 132, David C M Liewald 74 75, Li Lin 82, Lars Lind 133, Cecilia M Lindgren 40 87 134, YongMei Liu 135, Ruth J F Loos 28 59 136, Lorna M Lopez 74 137 138, Yingchang Lu 59, Leo-Pekka Lytykäinen 131 132, Anubha Mahajan 40, Chrysovalanto Mamasoula 139, Jaume Marrugat 83, Jonathan Marten 19, Yuri Milaneschi 140, Anna Morgan 62, Andrew P Morris 40 141, Alanna C Morrison 142, Peter J Munson 79, Mike A Nalls 143 144, Priyanka Nandakumar 50, Christopher P Nelson 60 61, Teemu Niiranen 102 145, Ilja M Nolte 146, Teresa Nutile 70, Albertine J Oldehinkel 147, Ben A Oostra 49, Paul F O'Reilly 148, Elin Org 16, Sandosh Padmanabhan 64 149, Walter Palmas 150, Aarno Palotie 103 151 152, Alison Pattie 75, Brenda W J H Penninx 140, Markus Perola 102 103 153, Annette Peters 94 95 154, Ozren Polasek 127 155, Peter P Pramstaller 78 156 157, Quang Tri Nguyen 79, Olli T Raitakari 158 159, Meixia Ren 160, Rainer Rettig 161, Kenneth Rice 162, Paul M Ridker 23 163, Janina S Ried 94, Harriette Riese 147, Samuli Ripatti 103 164, Antonietta Robino 72, Lynda M Rose 23, Jerome I Rotter 99, Igor Rudan 65, Daniela Ruggiero 70 71, Yasaman Saba 165, Cinzia F Sala 53, Veikko Salomaa 102, Nilesh J Samani 60 61, Antti-Pekka Sarin 103, Reinhold Schmidt 104, Helena Schmidt 165, Nick Shrine 54, David Siscovick 166, Albert V Smith 97 98, Harold Snieder 146, Siim Söber 130, Rossella Sorice 70, John M Starr 74 167, David J Stott 168, David P Strachan 169, Rona J Strawbridge 88 89, Johan Sundström 133, Morris A Swertz 170, Kent D Taylor 99, Alexander Teumer 81 171, Martin D Tobin 54, Maciej Tomaszewski 123 124, Daniela Toniolo 53, Michela Traglia 53, Stella Trompet 119 172, Jaakko Tuomilehto 173 174 175 176, Christophe Tzourio 21, André G Uitterlinden 91 177, Ahmad Vaez 146 178, Peter J van der Most 146, Cornelia M van Duijn 49, Anne-Claire Vergnaud 1, Germaine C Verwoert 91, Veronique Vitart 19, Uwe Völker 81 179, Peter Vollenweider 180, Dragana Vuckovic 62 181, Hugh Watkins 40 41, Sarah H Wild 182, Gonneke Willemsen 58, James F Wilson 19 65, Alan F Wright 19, Jie Yao 99, Tatijana Zemunik 183, Weihua Zhang 1 67, John R Attia 24, Adam S Butterworth 27 184, Daniel I Chasman 23 163, David Conen 185 186, Francesco Cucca 187 188, John Danesh 27 184, Caroline Hayward 19, Joanna M M Howson 27, Markku Laakso 189, Edward G Lakatta 190, Claudia Langenberg 28, Olle Melander 166, Dennis O Mook-Kanamori 26 191, Colin N A Palmer 32, Lorenz Risch 192 193 194, Robert A Scott 28, Rodney J Scott 24, Peter Sever 128, Tim D Spector 29, Pim van der Harst 195, Nicholas J Wareham 28, Eleftheria Zeggini 31, Daniel Levy 107 118, Patricia B Munroe 3 4, Christopher Newton-Cheh 134 196 197, Morris J Brown 3 4, Andres Metspalu 16, Adriana M Hung 198, Christopher J O'Donnell 199, Todd L Edwards 7, Bruce M Psaty 200 201, Ioanna Tzoulaki 1 2 5, Michael R Barnes 3 4, Louise V Wain 54 61, Paul Elliott 202 203 204 205 206, Mark J Caulfield 207 208, Million Veteran Program

**Affiliations at the time the manuscript was published:**

1Department of Epidemiology and Biostatistics, Imperial College London, London, UK.

2Department of Hygiene and Epidemiology, University of Ioannina Medical School, Ioannina, Greece.

3William Harvey Research Institute, Barts and The London School of Medicine and Dentistry, Queen Mary University of London, London, UK.

4National Institute for Health Research, Barts Cardiovascular Biomedical Research Center, Queen Mary University of London, London, UK.

5MRC-PHE Centre for Environment and Health, Imperial College London, London, UK.

6Department of Mathematics, Imperial College London, London, UK.

7Division of Epidemiology, Department of Medicine, Institute for Medicine and Public Health, Vanderbilt Genetics Institute, Vanderbilt University Medical Center, Tennessee Valley Healthcare System (626)/Vanderbilt University, Nashville, TN, USA.

8Vanderbilt Genetics Institute, Vanderbilt Epidemiology Center, Department of Obstetrics and Gynecology, Vanderbilt University Medical Center; Tennessee Valley Health Systems VA, Nashville, TN, USA.

9Department of Epidemiology, Emory University Rollins School of Public Health, Atlanta, GA, USA.

10Department of Biomedical Informatics, Emory University School of Medicine, Atlanta, GA, USA.

11Massachusetts Veterans Epidemiology Research and Information Center (MAVERIC), VA Boston Healthcare System, Boston, MA, USA.

12Division of Aging, Department of Medicine, Brigham and Women's Hospital; Department of Medicine, Harvard Medical School, Boston, MA, USA.

13Atlanta VAMC and Emory Clinical Cardiovascular Research Institute, Atlanta, GA, USA.

14VA Palo Alto Health Care System, Division of Cardiovascular Medicine, Stanford University School of Medicine, Stanford, CA, USA.

15Nephrology Section, Memphis VA Medical Center and University of Tennessee Health Science Center, Memphis, TN, USA.

16Estonian Genome Center, University of Tartu, Tartu, Estonia.

17Program in Medical and Population Genetics, Broad Institute of Harvard and MIT, Cambridge, MA, USA.

18Department Clinical Sciences, Malmö, Lund University, Malmö, Sweden.

19MRC Human Genetics Unit, MRC Institute of Genetics and Molecular Medicine, University of Edinburgh, Western General Hospital, Edinburgh, Scotland, UK.

20Department of Neurology, Bordeaux University Hospital, Bordeaux, France.

21Univ. Bordeaux, Inserm, Bordeaux Population Health Research Center, CHU Bordeaux, Bordeaux, France.

22Laboratory of Genetics and Genomics, NIA/NIH, Baltimore, MD, USA.

23Division of Preventive Medicine, Brigham and Women's Hospital, Boston, MA, USA.

24Hunter Medical Research Institute and Faculty of Health, University of Newcastle, New Lambton Heights, New South Wales, Australia.

25Department of Biostatistics and Center for Statistical Genetics, University of Michigan, Ann Arbor, MI, USA.

26Department of Clinical Epidemiology, Leiden University Medical Center, Leiden, the Netherlands.

27MRC/BHF Cardiovascular Epidemiology Unit, Department of Public Health and Primary Care, University of Cambridge, Cambridge, UK.

28MRC Epidemiology Unit, University of Cambridge School of Clinical Medicine, Cambridge, UK.

29Department of Twin Research and Genetic Epidemiology, Kings College London, London, UK.

30NIHR Biomedical Research Centre at Guy's and St Thomas' Foundation Trust, London, UK.

31Wellcome Trust Sanger Institute, Hinxton, UK.

32Division of Molecular and Clinical Medicine, School of Medicine, University of Dundee, Dundee, UK.

33Department of Pharmacy, COMSATS Institute of Information Technology, Abbottabad, Pakistan.

34Department of Pathology and Molecular Medicine, McMaster University, Hamilton, Ontario, Canada.

35Institut universitaire de cardiologie et de pneumologie de Québec-Université Laval, Quebec City, Quebec, Canada.

36Cardiovascular Research Center and Center for Human Genetic Research, Massachusetts General Hospital, Boston, MA, USA.

37University of Groningen, University Medical Center Groningen, Department of Cardiology, Groningen, the Netherlands.

38University of Lille, Inserm, Centre Hosp. Univ. Lille, Institut Pasteur de Lille, UMR1167 - RID-AGE - Risk factors and molecular determinants of aging-related diseases, Epidemiology and Public Health Department, Lille, France.

39University of Dundee, Ninewells Hospital & Medical School, Dundee, UK.

40Wellcome Trust Centre for Human Genetics, University of Oxford, Oxford, UK.

41Division of Cardiovascular Medicine, Radcliffe Department of Medicine, University of Oxford, Oxford, UK.

42Usher Institute of Population Health Sciences and Informatics, University of Edinburgh, Edinburgh, UK.

43Department of Internal Medicine, Section Gerontology and Geriatrics, Leiden University Medical Center, Leiden, the Netherlands.

44Imperial Clinical Trials Unit, London, UK.

45School of Medicine, University College Dublin, Dublin, Ireland.

46Molecular and Cellular Therapeutics, Royal College of Surgeons in Ireland, Dublin, Ireland.

47International Centre for Circulatory Health, Imperial College London, London, UK.

48Center for Statistical Genetics, Department of Biostatistics, SPH II, Washington Heights, Ann Arbor, MI, USA.

49Genetic Epidemiology Unit, Department of Epidemiology, Erasmus MC, Rotterdam, the Netherlands.

50Center for Complex Disease Genomics, McKusick-Nathans Institute of Genetic Medicine, Johns Hopkins University School of Medicine, Baltimore, MD, USA.

51Institute of Genetic Medicine, Newcastle University, Newcastle upon Tyne, UK.

52Sema4, a Mount Sinai venture, Stamford, CT, USA.

53Division of Genetics and Cell Biology, San Raffaele Scientific Institute, Milan, Italy.

54Department of Health Sciences, University of Leicester, Leicester, UK.

55Cardiovascular Health Research Unit, Department of Medicine, University of Washington, Seattle, WA, USA.

56Institute of Social and Preventive Medicine, University Hospital of Lausanne, Lausanne, Switzerland.

57Human Genetics Center, School of Public Health, The University of Texas Health Science Center at Houston and Human Genome Sequencing Center, Baylor College of Medicine, Houston, TX, USA.

58Department of Biological Psychology, Vrije Universiteit Amsterdam, EMGO+ Institute, VU University Medical Center, Amsterdam, the Netherlands.

59The Charles Bronfman Institute for Personalized Medicine, Icahn School of Medicine at Mount Sinai, New York, NY, USA.

60Department of Cardiovascular Sciences, University of Leicester, Leicester, UK.

61NIHR Leicester Biomedical Research Centre, Glenfield Hospital, Leicester, UK.

62Department of Medical, Surgical and Health Sciences, University of Trieste, Trieste, Italy.

63Medical Genetics Section, Centre for Genomic and Experimental Medicine, Institute of Genetics and Molecular Medicine, University of Edinburgh, Edinburgh, UK.

64Generation Scotland, Centre for Genomic and Experimental Medicine, University of Edinburgh, Edinburgh, UK.

65Centre for Global Health Research, Usher Institute of Population Health Sciences and Informatics, University of Edinburgh, Edinburgh, Scotland, UK.

66Lee Kong Chian School of Medicine, Nanyang Technological University, Singapore, Singapore.

67Department of Cardiology, Ealing Hospital, Middlesex, UK.

68Imperial College Healthcare NHS Trust, London, UK.

69Centre for Brain Research, Indian Institute of Science, Bangalore, India.

70Institute of Genetics and Biophysics "A. Buzzati-Traverso", CNR, Napoli, Italy.

71IRCCS Neuromed, Pozzilli, Isernia, Italy.

72Institute for Maternal and Child Health IRCCS Burlo Garofolo, Trieste, Italy.

73Medical Genomics and Metabolic Genetics Branch, National Human Genome Research Institute, NIH, Bethesda, MD, USA.

74Centre for Cognitive Ageing and Cognitive Epidemiology, University of Edinburgh, Edinburgh, UK.

75Department of Psychology, University of Edinburgh, Edinburgh, UK.

76Department of Internal Medicine, Division of Nephrology, University of Groningen, University Medical Center Groningen, Groningen, the Netherlands.

77Department of Molecular Epidemiology, Leiden University Medical Center, Leiden, the Netherlands.

78Institute for Biomedicine, Eurac Research, Bolzano, Italy - Affiliated Institute of the University of Lübeck, Lübeck, Germany.

79Mathematical and Statistical Computing Laboratory, Office of Intramural Research, Center for Information Technology, National Institutes of Health, Bethesda, MD, USA.

80Department of Internal Medicine B, University Medicine Greifswald, Greifswald, Germany.

81DZHK (German Centre for Cardiovascular Research), partner site Greifswald, Greifswald, Germany.

82Cardiology, Department of Medicine, Geneva University Hospital, Geneva, Switzerland.

83CIBERCV & Cardiovascular Epidemiology and Genetics, IMIM, Barcelona, Spain.

84Faculty of Medicine, Universitat de Vic-Central de Catalunya, Vic, Spain.

85Department of Immunology, Genetics and Pathology, Uppsala Universitet, Science for Life Laboratory, Uppsala, Sweden.

86Wellcome Centre for Human Genetics, University of Oxford, Oxford, UK.

87Big Data Institute, Li Ka Shing Center for Health for Health Information and Discovery, Oxford University, Oxford, UK.

88Cardiovascular Medicine Unit, Department of Medicine Solna, Karolinska Institutet, Stockholm, Sweden.

89Centre for Molecular Medicine, L8:03, Karolinska Universitetsjukhuset, Solna, Sweden.

90Department of Numerical Analysis and Computer Science, Stockholm University, Stockholm, Sweden.

91Department of Epidemiology, Erasmus MC, Rotterdam, the Netherlands.

92Department of Public Health and Caring Sciences, Geriatrics, Uppsala, Sweden.

93Research Unit of Molecular Epidemiology, Helmholtz Zentrum München, German Research Center for Environmental Health, Neuherberg, Germany.

94Institute of Epidemiology, Helmholtz Zentrum München, German Research Center for Environmental Health, Neuherberg, Germany.

95German Center for Diabetes Research (DZD e.V.), Neuherberg, Germany.

96Department of Psychology, School of Social Sciences, Heriot-Watt University, Edinburgh, UK.

97Faculty of Medicine, University of Iceland, Reykjavik, Iceland.

98Icelandic Heart Association, Kopavogur, Iceland.

99The Institute for Translational Genomics and Population Sciences, Department of Pediatrics, LABioMed at Harbor-UCLA Medical Center, Torrance, CA, USA.

100Intramural Research Program, Laboratory of Epidemiology, Demography, and Biometry, National Institute on Aging, Bethesda, MD, USA.

101Department of Psychiatry, University of Groningen, University Medical Center Groningen, Groningen, the Netherlands.

102Department of Public Health Solutions, National Institute for Health and Welfare (THL), Helsinki, Finland.

103Institute for Molecular Medicine Finland (FIMM), University of Helsinki, Helsinki, Finland.

104Clinical Division of Neurogeriatrics, Department of Neurology, Medical University of Graz, Graz, Austria.

105Institute for Medical Informatics, Statistics and Documentation, Medical University of Graz, Graz, Austria.

106Department of Epidemiology, Harvard T.H. Chan School of Public Health, Boston, MA, USA.

107National Heart, Lung and Blood Institute's Framingham Heart Study, Framingham, MA, USA.

108The Population Science Branch, Division of Intramural Research, National Heart, Lung, and Blood Institute, National Institutes of Health, Bethesda, MD, USA.

109Department of Medical Sciences, Molecular Epidemiology and Science for Life Laboratory, Uppsala University, Uppsala, Sweden.

110Division of Cardiovascular Medicine, Department of Medicine, Stanford University School of Medicine, Stanford, CA, USA.

111Department of Pulmonary Physiology and Sleep, Sir Charles Gairdner Hospital, Hospital Avenue, Nedlands, Western Australia, Australia.

112School of Medicine and Pharmacology, University of Western Australia, Perth, Western Australia, Australia.

113Department of Psychiatry, VU University Medical Center, Amsterdam Neuroscience, Amsterdam, the Netherlands.

114Biocenter Oulu, University of Oulu, Oulu, Finland.

115Center For Life-course Health Research, University of Oulu, Oulu, Finland.

116Unit of Primary Care, Oulu University Hospital, Oulu, Oulu, Finland.

117Hebrew SeniorLife, Harvard Medical School, Boston, MA, USA.

118Population Sciences Branch, National Heart, Lung, and Blood Institute, National Institutes of Health, Bethesda, MD, USA.

119Department of Cardiology, Leiden University Medical Center, Leiden, the Netherlands.

120Department of Clinical Physiology, Tampere University Hospital, Tampere, Finland.

121Department of Clinical Physiology, Finnish Cardiovascular Research Center - Tampere, Faculty of Medicine and Life Sciences, University of Tampere, Tampere, Finland.

122Broad Institute of the Massachusetts Institute of Technology and Harvard University, Cambridge, MA, USA.

123Division of Cardiovascular Sciences, Faculty of Biology, Medicine and Health, The University of Manchester, Manchester, UK.

124Division of Medicine, Manchester University NHS Foundation Trust, Manchester Academic Health Science Centre, Manchester, UK.

125Department of Public Health and Primary Care, Institute of Public Health, University of Cambridge, Cambridge, UK.

126Data Science Institute and Lancaster Medical School, Lancaster, UK.

127Department of Public Health, Faculty of Medicine, University of Split, Split, Croatia.

128National Heart and Lung Institute, Imperial College London, London, UK.

129Swiss Institute of Bioinformatics, Lausanne, Switzerland.

130Institute of Biomedicine and Translational Medicine, University of Tartu, Tartu, Estonia.

131Department of Clinical Chemistry, Fimlab Laboratories, Tampere, Finland.

132Department of Clinical Chemistry, Finnish Cardiovascular Research Center - Tampere, Faculty of Medicine and Life Sciences, University of Tampere, Tampere, Finland.

133Department of Medical Sciences, Cardiovascular Epidemiology, Uppsala University, Uppsala, Sweden.

134Program in Medical and Population Genetics, Broad Institute, Cambridge, MA, USA.

135Division of Public Health Sciences, Wake Forest School of Medicine, Winston-Salem, NC, USA.

136Mindich Child Health Development Institute, The Icahn School of Medicine at Mount Sinai, New York, NY, USA.

137Department of Psychiatry, Royal College of Surgeons in Ireland, Education and Research Centre, Beaumont Hospital, Dublin, Ireland.

138University College Dublin, UCD Conway Institute, Centre for Proteome Research, UCD, Belfield, Dublin, Ireland.

139Institute of Health and Society, Newcastle University, Newcastle upon Tyne, UK.

140Department of Psychiatry, Amsterdam Public Health and Amsterdam Neuroscience, VU University Medical Center/GGZ inGeest, Amsterdam, the Netherlands.

141Department of Biostatistics, University of Liverpool, Liverpool, UK.

142Department of Epidemiology, Human Genetics and Environmental Sciences, School of Public Health, University of Texas Health Science Center at Houston, Houston, TX, USA.

143Data Tecnica International, Glen Echo, MD, USA.

144Laboratory of Neurogenetics, National Institute on Aging, Bethesda, MD, USA.

145Department of Medicine, Turku University Hospital and University of Turku, Turku, Finland.

146Department of Epidemiology, University of Groningen, University Medical Center Groningen, Groningen, the Netherlands.

147Interdisciplinary Center Psychopathology and Emotion Regulation (ICPE), University of Groningen, University Medical Center Groningen, Groningen, the Netherlands.

148SGDP Centre, Institute of Psychiatry, Psychology and Neuroscience, King's College London, London, UK.

149British Heart Foundation Glasgow Cardiovascular Research Centre, Institute of Cardiovascular and Medical Sciences, College of Medical, Veterinary and Life Sciences, University of Glasgow, Glasgow, UK.

150Department of Medicine, Columbia University Medical Center, New York, NY, USA.

151Analytic and Translational Genetics Unit, Department of Medicine, Department of Neurology and Department of Psychiatry, Massachusetts General Hospital, Boston, MA, USA.

152The Stanley Center for Psychiatric Research and Program in Medical and Population Genetics, The Broad Institute of MIT and Harvard, Cambridge, MA, USA.

153University of Tartu, Tartu, Estonia.

154German Center for Cardiovascular Disease Research (DZHK), partner site Munich, Neuherberg, Germany.

155Psychiatric Hospital "Sveti Ivan", Zagreb, Croatia.

156Department of Neurology, General Central Hospital, Bolzano, Italy.

157Department of Neurology, University of Lübeck, Lübeck, Germany.

158Department of Clinical Physiology and Nuclear Medicine, Turku University Hospital, Turku, Finland.

159Research Centre of Applied and Preventive Cardiovascular Medicine, University of Turku, Turku, Finland.

160Fujian Key Laboratory of Geriatrics, Department of Geriatric Medicine, Fujian Provincial Hospital, Fujian Medical University, Fuzhou, China.

161Institute of Physiology, University Medicine Greifswald, Karlsburg, Germany.

162Department of Biostatistics, University of Washington, Seattle, WA, USA.

163Harvard Medical School, Boston, MA, USA.

164Public Health, Faculty of Medicine, University of Helsinki, Helsinki, Finland.

165Gottfried Schatz Research Center for Cell Signaling, Metabolism & Aging, Molecular Biology and Biochemistry, Medical University of Graz, Graz, Austria.

166The New York Academy of Medicine, New York, NY, USA.

167Alzheimer Scotland Dementia Research Centre, University of Edinburgh, Edinburgh, UK.

168Institute of Cardiovascular and Medical Sciences, Faculty of Medicine, University of Glasgow, Glasgow, UK.

169Population Health Research Institute, St George's, University of London, London, UK.

170Department of Genetics, University of Groningen, University Medical Center Groningen, Groningen, the Netherlands.

171Institute for Community Medicine, University Medicine Greifswald, Greifswald, Germany.

172Department of Gerontology and Geriatrics, Leiden University Medical Center, Leiden, the Netherlands.

173Dasman Diabetes Institute, Dasman, Kuwait.

174Chronic Disease Prevention Unit, National Institute for Health and Welfare, Helsinki, Finland.

175Department of Public Health, University of Helsinki, Helsinki, Finland.

176Saudi Diabetes Research Group, King Abdulaziz University, Jeddah, Saudi Arabia.

177Department of Internal Medicine, Erasmus MC, Rotterdam, the Netherlands.

178Research Institute for Primordial Prevention of Non-communicable Disease, Isfahan University of Medical Sciences, Isfahan, Iran.



179Interfaculty Institute for Genetics and Functional Genomics, University Medicine Greifswald, Greifswald, Germany.

180Department of Internal Medicine, University Hospital, CHUV, Lausanne, Switzerland.

181Experimental Genetics Division, Sidra Medical and Research Center, Doha, Qatar.

182Centre for Population Health Sciences, Usher Institute of Population Health Sciences and Informatics, University of Edinburgh, Edinburgh, Scotland, UK.

183Department of Biology, Faculty of Medicine, University of Split, Split, Croatia.

184The National Institute for Health Research Blood and Transplant Research Unit in Donor Health and Genomics, University of Cambridge, Cambridge, UK.

185Division of Cardiology, University Hospital, Basel, Switzerland.

186Division of Cardiology, Department of Medicine, McMaster University, Hamilton, Ontario, Canada.

187Institute of Genetic and Biomedical Research, National Research Council (CNR), Monserrato, Cagliari, Italy.

188Department of Biomedical Sciences, University of Sassari, Sassari, Italy.

189Institute of Clinical Medicine, Internal Medicine, University of Eastern Finland and Kuopio University Hospital, Kuopio, Finland.

190Laboratory of Cardiovascular Science, National Institute on Aging, National Institutes of Health, Baltimore, MD, USA.

191Department of Public Health and Primary Care, Leiden University Medical Center, Leiden, the Netherlands.

192Labormedizinisches Zentrum Dr. Risch, Schaan, Liechtenstein.

193Private University of the Principality of Liechtenstein, Triesen, Liechtenstein.

194University Institute of Clinical Chemistry, Inselspital, Bern University Hospital, University of Bern, Bern, Switzerland.

195Department of Cardiology, University of Groningen, University Medical Center Groningen, Groningen, the Netherlands.

196Center for Genomic Medicine, Massachusetts General Hospital, Boston, MA, USA.

197Cardiovascular Research Center, Massachusetts General Hospital, Boston, MA, USA.

198Tennessee Valley Healthcare System (Nashville VA) & Vanderbilt University, Nashville, TN, USA.

199VA Boston Healthcare, Section of Cardiology and Department of Medicine, Brigham and Women's Hospital, Harvard Medical School, Boston, MA, USA.

200Cardiovascular Health Research Unit, Departments of Medicine, Epidemiology and Health Services, University of Washington, Seattle, WA, USA.

201Kaiser Permanente Washington Health Research Institute, Seattle, WA, USA.

202Department of Epidemiology and Biostatistics, Imperial College London, London, UK. p.elliott@imperial.ac.uk.

203MRC-PHE Centre for Environment and Health, Imperial College London, London, UK. p.elliott@imperial.ac.uk.

204National Institute for Health Research Imperial Biomedical Research Centre, Imperial College Healthcare NHS Trust and Imperial College London, London, UK. p.elliott@imperial.ac.uk.

205UK Dementia Research Institute (UK DRI) at Imperial College London, London, UK. p.elliott@imperial.ac.uk.

206Health Data Research-UK London substantive site, London, UK. p.elliott@imperial.ac.uk.

207William Harvey Research Institute, Barts and The London School of Medicine and Dentistry, Queen Mary University of London, London, UK. m.j.caulfield@qmul.ac.uk.

208National Institute for Health Research, Barts Cardiovascular Biomedical Research Center, Queen Mary University of London, London, UK. m.j.caulfield@qmul.ac.uk.

## References

1. Mancuso N, Shi H, Goddard P, Kichaev G, Gusev A, Pasaniuc B. Integrating Gene Expression with Summary Association Statistics to Identify Genes Associated with 30 Complex Traits. *Am J Hum Genet* 2017; **100**(3): 473-87.
2. GTex Consortium. The Genotype-Tissue Expression (GTEx) project. *Nat Genet* 2013; **45**(6): 580-5.
3. Gusev A, Ko A, Shi H, et al. Integrative approaches for large-scale transcriptome-wide association studies. *Nat Genet* 2016; **48**(3): 245-52.
4. Gusev A, Mancuso N, Won H, et al. Transcriptome-wide association study of schizophrenia and chromatin activity yields mechanistic disease insights. *Nat Genet* 2018; **50**(4): 538-48.
5. Yang J, Ferreira T, Morris AP, et al. Conditional and joint multiple-SNP analysis of GWAS summary statistics identifies additional variants influencing complex traits. *Nat Genet* 2012; **44**(4): 369-75, S1-3.
6. Yavorska OO, Burgess S. MendelianRandomization: an R package for performing Mendelian randomization analyses using summarized data. *Int J Epidemiol* 2017; **46**(6): 1734-9.
7. Hemani G, Tilling K, Davey Smith G. Orienting the causal relationship between imprecisely measured traits using GWAS summary data. *PLoS Genet* 2017; **13**(11): e1007081.
